# Supplementary material for: Ring size and nothing else matters: unusual regioselectivity of alkyne hydration by NHC gold(i) complexes
Source: Royal Society of Chemistry journal article supplement (doi:10.1039/d1cc01837j), 2021-01-01
Supplement: d1cc01837j1.pdf [file d1cc01837j1.pdf]

## **Supporting Information**

## Contents

|                                                                             |           |
|-----------------------------------------------------------------------------|-----------|
| <b>General information</b> .....                                            | <b>4</b>  |
| <b>Synthesis and characterization of compounds</b> .....                    | <b>5</b>  |
| <b>General procedure</b> .....                                              | <b>5</b>  |
| 2-phenyl-1-p-tolyloethanone ( <b>1a</b> ) .....                             | 5         |
| 2-phenyl-1-o-tolyloethanone ( <b>2a</b> ) .....                             | 5         |
| 2-mesityl-1-phenylethanone ( <b>3b</b> ) .....                              | 5         |
| 1-(4-methoxyphenyl)-2-phenylethanone ( <b>4a</b> ) .....                    | 6         |
| 1-phenyl-2-(3-(trifluoromethyl)phenyl)ethanone ( <b>5a</b> ) .....          | 6         |
| 2-(4-nitrophenyl)-1-phenylethanone ( <b>6a</b> ).....                       | 6         |
| 1-(4-methoxyphenyl)-2-(4-nitrophenyl)ethanone ( <b>7a</b> ).....            | 7         |
| 1-(4-(dimethylamino)phenyl)-2-(4-nitrophenyl)ethanone ( <b>8a</b> ).....    | 7         |
| 1-phenyloctan-2-one ( <b>9b</b> ).....                                      | 7         |
| 1-(4-methoxyphenyl)octan-2-one ( <b>10b</b> ).....                          | 8         |
| 1-(4-nitrophenyl)octan-2-one ( <b>11b</b> ) .....                           | 8         |
| 1-(4-(trifluoromethyl)phenyl)octan-2-one ( <b>12b</b> ).....                | 8         |
| 1-(3-nitrophenyl)octan-2-one ( <b>13b</b> ) .....                           | 9         |
| 1-(2-bromophenyl)octan-2-one ( <b>14b</b> ) .....                           | 9         |
| 1-(2-methoxyphenyl)octan-1-one ( <b>15a</b> ) .....                         | 10        |
| 1-(2-methoxyphenyl)octan-2-one ( <b>15b</b> ).....                          | 10        |
| 1-(4-chlorophenyl)octan-2-one ( <b>16b</b> ).....                           | 10        |
| Methyl 4-(2-oxooctyl)benzoate ( <b>17b</b> ) .....                          | 11        |
| Ethyl 4-(2-oxooctyl)benzoate ( <b>18b</b> ).....                            | 11        |
| 1-mesityloctan-2-one ( <b>19b</b> ) .....                                   | 11        |
| 3,3-dimethyl-1-(4-nitrophenyl)butan-2-one ( <b>20b</b> ) .....              | 12        |
| 1-(4-methoxyphenyl)-3,3-dimethylbutan-2-one ( <b>21b</b> ).....             | 12        |
| 3,3-dimethyl-1-phenylbutan-2-one ( <b>22b</b> ).....                        | 12        |
| Acetophenone ( <b>23a</b> ) .....                                           | 13        |
| <b>Kinetic experiments</b> .....                                            | <b>14</b> |
| <b>Computational details</b> .....                                          | <b>15</b> |
| <b>Cartesian coordinates and energies of the optimized structures</b> ..... | <b>17</b> |
| <b>Intermediate I-alkyne</b> .....                                          | <b>17</b> |
| <b>Intermediate I-water</b> .....                                           | <b>17</b> |
| <b>Intermediate I-water-dimer</b> .....                                     | <b>18</b> |

|                                       |           |
|---------------------------------------|-----------|
| <b>Intermediate I-6-DippAu</b> .....  | <b>18</b> |
| <b>Intermediate II</b> .....          | <b>21</b> |
| <b>Intermediate syn III-aM</b> .....  | <b>24</b> |
| <b>Intermediate syn-III-M</b> .....   | <b>27</b> |
| <b>Intermediate anti-III-aM</b> ..... | <b>30</b> |
| <b>Intermediate anti-III-M</b> .....  | <b>33</b> |
| <b>Intermediate syn-TS-aM</b> .....   | <b>36</b> |
| <b>Intermediate syn-TS-M</b> .....    | <b>39</b> |
| <b>Intermediate anti-TS-aM</b> .....  | <b>41</b> |
| <b>Intermediate anti-TS-M</b> .....   | <b>45</b> |
| <b>Intermediate syn-IV-aM</b> .....   | <b>48</b> |
| <b>Intermediate syn-IV-M</b> .....    | <b>50</b> |
| <b>Intermediate anti-IV-aM</b> .....  | <b>53</b> |
| <b>Intermediate anti-IV-M</b> .....   | <b>56</b> |
| <b>Intermediate syn-V-aM</b> .....    | <b>59</b> |
| <b>Intermediate V-M</b> .....         | <b>62</b> |
| <b>References</b> .....               | <b>66</b> |
| <b>Spectra</b> .....                  | <b>67</b> |

## General information

All catalytic reactions were carried out under ambient atmosphere. Chemicals and solvents were obtained from commercial sources and used without further purification. NMR spectra were obtained on a Bruker "Avance 600" (600 MHz  $^1\text{H}$ , 151 MHz  $^{13}\text{C}$ ). The chemical shifts are frequency referenced relative to the residual undeuterated solvent peaks. Coupling constants  $J$  are given in Hertz as positive values regardless of their real individual signs. The multiplicity of the signals is indicated as "s", "d", "t" or "m" for singlet, doublet, triplet or multiplet, respectively. The abbreviation "br" is given for broadened signals.

## Synthesis and characterization of compounds

### General procedure

A screw-cap vial equipped with a magnetic stir bar was charged with 0.01 mmol of (7-Dipp)AuCl in 1 ml of dioxane, 0.01 mmol of AgOTf, 15 mmol of H<sub>2</sub>O and 1 mmol of acetylene. The vial was transferred to a preheated oil bath (80°C). After 24 h reaction mixture was cooled, concentrated in vacuum and the product isolated by flash chromatography on a silica gel by elution with hexane-CH<sub>2</sub>Cl<sub>2</sub> mixture or recrystallized from hexane/CH<sub>2</sub>Cl<sub>2</sub>.

### 2-phenyl-1-p-tolyloethanone (**1a**)

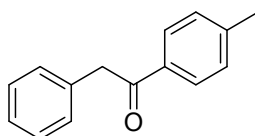

Yield 142 mg, 67%. White solid. M.p. 96-98 °C (lit data: M.p. 104-105 °C).<sup>1</sup>

<sup>1</sup>H NMR (600 MHz, Chloroform-*d*) δ 7.95 – 7.91 (m, 2H), 7.33 (t, *J* = 7.4 Hz, 2H), 7.29 – 7.24 (m, 5H), 4.26 (s, 2H), 2.41 (s, 3H).

<sup>13</sup>C{<sup>1</sup>H} NMR (151 MHz, Chloroform-*d*) δ 197.4, 144.1, 134.9, 134.2, 129.5, 129.4, 128.9, 128.8, 126.9, 45.5, 21.8.

The NMR data are in agreement with previously reported.<sup>1</sup>

### 2-phenyl-1-o-tolyloethanone (**2a**)

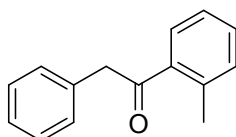

Yield 136 mg, 65%. White solid. M.p. 79-80 °C. (lit data: Colorless oil).<sup>2</sup>

<sup>1</sup>H NMR (600 MHz, Chloroform-*d*) δ 7.72 (d, *J* = 7.7 Hz, 1H), 7.39 – 7.35 (m, 1H), 7.35 – 7.30 (m, 2H), 7.29 – 7.21 (m, 5H), 4.22 (s, 2H), 2.45 (s, 3H).

<sup>13</sup>C{<sup>1</sup>H} NMR (151 MHz, Chloroform-*d*) δ 201.6, 138.7, 137.8, 134.6, 132.1, 131.4, 129.7, 128.7, 127.0, 125.7, 48.6, 21.4.

The NMR data are in agreement with previously reported.<sup>3</sup>

*2-mesityl-1-phenylethanone (3b)*

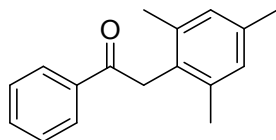

Yield 22 mg, 9.4%. White solid. M.p. 144-145 °C (lit data: M.p. 146.5-148 °C).<sup>4</sup>

<sup>1</sup>H NMR (600 MHz, Chloroform-*d*) δ 8.08 (d, *J* = 7.5 Hz, 2H), 7.64 – 7.57 (m, 1H), 7.51 (t, *J* = 7.6 Hz, 2H), 6.90 (s, 2H), 4.34 (s, 2H), 2.29 (s, 3H), 2.19 (s, 6H).

<sup>13</sup>C{<sup>1</sup>H} NMR (151 MHz, Chloroform-*d*) δ 197.2, 137.3, 137.0, 136.5, 133.3, 129.4, 129.0, 128.8, 128.2, 39.5, 21.1, 20.4.

The NMR data are in agreement with previously reported.<sup>4</sup>

*1-(4-methoxyphenyl)-2-phenylethanone (4a)*

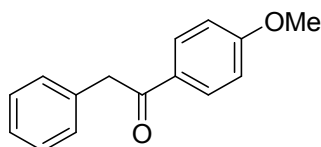

Yield 163 mg, 72%. White solid. M.p. 65-66 °C (lit data: M.p. 66-68 °C).<sup>5</sup>

<sup>1</sup>H NMR (600 MHz, Chloroform-*d*) δ 8.00 (d, *J* = 8.8 Hz, 2H), 7.32 (t, *J* = 7.5 Hz, 2H), 7.30 – 7.23 (m, 3H), 6.93 (d, *J* = 8.8 Hz, 2H), 4.24 (s, 2H), 3.86 (s, 3H).

<sup>13</sup>C{<sup>1</sup>H} NMR (151 MHz, Chloroform-*d*) δ 196.3, 163.6, 135.1, 131.1, 129.8, 129.5, 128.7, 126.9, 113.9, 55.6, 45.4.

The NMR data are in agreement with previously reported.<sup>4</sup>

*1-phenyl-2-(3-(trifluoromethyl)phenyl)ethanone (5a)*

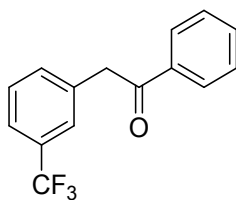

Yield 188.6 mg, 71%. White solid. . M.p. 90-93°C (lit data: M.p. 35-36 °C).<sup>6</sup>

<sup>1</sup>H NMR (600 MHz, Chloroform-*d*) δ 8.03 (d, *J* = 7.3 Hz, 2H), 7.60 (t, *J* = 7.4 Hz, 1H), 7.54 (s, 2H), 7.50 (t, *J* = 7.8 Hz, 2H), 7.48 – 7.44 (m, 2H), 4.36 (s, 2H).

<sup>13</sup>C{<sup>1</sup>H} NMR (151 MHz, Chloroform-*d*) δ 196.7, 136.5, 135.5, 133.6, 133.2, 131.0 (q, *J* = 32.2 Hz), 129.1, 128.9, 128.6, 126.6 – 126.4 (m), 124.5 (q, *J* = 272.8 Hz), 124.0 – 123.88 (m), 45.0.

The NMR data are in agreement with previously reported.<sup>6</sup>

*2-(4-nitrophenyl)-1-phenylethanone (6a)*

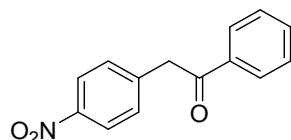

Yield 163 mg, 67.5%. Red solid. M.p. 138-139 °C (lit data: M.p. 141-142 °C).<sup>7</sup>

<sup>1</sup>H NMR (600 MHz, Chloroform-*d*) δ 8.20 (d, *J* = 8.6 Hz, 2H), 8.01 (d, *J* = 7.4 Hz, 2H), 7.61 (t, *J* = 7.4 Hz, 1H), 7.50 (t, *J* = 7.7 Hz, 2H), 7.43 (d, *J* = 8.5 Hz, 2H), 4.42 (s, 2H).

<sup>13</sup>C{<sup>1</sup>H} NMR (151 MHz, Chloroform-*d*) δ 196.1, 147.2, 142.2, 136.3, 133.9, 130.8, 129.0, 128.6, 123.9, 45.1.

The NMR data are in agreement with previously reported.<sup>7</sup>

*1-(4-methoxyphenyl)-2-(4-nitrophenyl)ethanone (7a)*

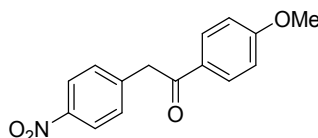

Yield 236 mg, 87%. Yellow needles. M.p. 110-112 °C (lit data: M.p. 114-116 °C).<sup>8</sup>

<sup>1</sup>H NMR (600 MHz, Chloroform-*d*) δ 8.18 (d, *J* = 8.6 Hz, 2H), 7.99 (d, *J* = 8.8 Hz, 2H), 7.43 (d, *J* = 8.5 Hz, 2H), 6.96 (d, *J* = 8.8 Hz, 2H), 4.35 (s, 2H), 3.88 (s, 3H).

<sup>13</sup>C{<sup>1</sup>H} NMR (151 MHz, Chloroform-*d*) δ 194.6, 164.1, 147.1, 142.6, 130.9, 130.7, 129.3, 123.8, 114.2, 55.7, 44.8.

The NMR data are in agreement with previously reported.<sup>8</sup>

*1-(4-(dimethylamino)phenyl)-2-(4-nitrophenyl)ethanone (8a)*

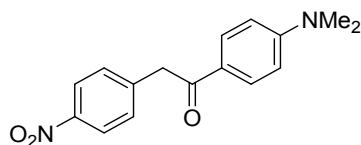

Yield 188 mg, 66%. Orange needles. M.p. >200 °C (lit data: M.p. 246-247 °C).<sup>9</sup>

<sup>1</sup>H NMR (600 MHz, Chloroform-*d*) δ 8.17 (d, *J* = 8.7 Hz, 2H), 7.91 (d, *J* = 9.0 Hz, 2H), 7.44 (d, *J* = 8.6 Hz, 2H), 6.66 (d, *J* = 9.0 Hz, 2H), 4.30 (s, 2H), 3.07 (s, 6H).

<sup>13</sup>C{<sup>1</sup>H} NMR (151 MHz, Chloroform-*d*) δ 194.0, 153.8, 143.6, 131.0, 130.6, 124.1, 123.8, 110.9, 44.5, 40.2.

The NMR data are in agreement with previously reported.<sup>9</sup>

*1-phenyloctan-2-one (9b)*

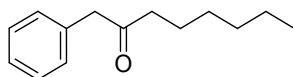

Yield 126.7 mg, 62%. Colorless oil.

$^1\text{H}$  NMR (600 MHz, Chloroform-*d*)  $\delta$  7.33 (t,  $J = 7.5$  Hz, 2H), 7.29 – 7.23 (m, 1H), 7.20 (d,  $J = 7.4$  Hz, 2H), 3.68 (s, 2H), 2.44 (t,  $J = 7.4$  Hz, 2H), 1.58 – 1.48 (m, 2H), 1.30 – 1.18 (m, 6H), 0.86 (t,  $J = 7.1$  Hz, 3H).

$^{13}\text{C}\{^1\text{H}\}$  NMR (151 MHz, Chloroform-*d*)  $\delta$  208.7, 134.5, 129.5, 128.8, 127.0, 50.3, 42.1, 31.7, 28.9, 23.8, 22.6, 14.1.

The NMR data are in agreement with previously reported.<sup>10</sup>

*1-(4-methoxyphenyl)octan-2-one (10b)*

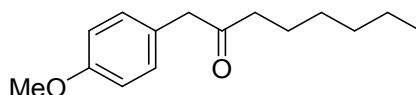

Yield 145 mg, 62%. Yellow oil.

$^1\text{H}$  NMR (600 MHz, Chloroform-*d*)  $\delta$  7.11 (d,  $J = 8.5$  Hz, 2H), 6.86 (d,  $J = 8.5$  Hz, 2H), 3.79 (s, 3H), 3.61 (s, 2H), 2.42 (t,  $J = 7.4$  Hz, 2H), 1.57 – 1.50 (m, 2H), 1.28 – 1.20 (m, 6H), 0.86 (t,  $J = 7.1$  Hz, 3H).

$^{13}\text{C}\{^1\text{H}\}$  NMR (151 MHz, Chloroform-*d*)  $\delta$  209.2, 158.7, 130.5, 126.6, 114.2, 55.4, 49.4, 41.2, 31.7, 28.9, 23.9, 22.6, 14.1.

The NMR data are in agreement with previously reported.<sup>11</sup>

*1-(4-nitrophenyl)octan-2-one (11b)*

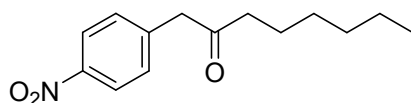

Yield 240 mg, 96%. Yellow crystals. M.p. 46 °C (lit data: orange liquid).<sup>11</sup>

$^1\text{H}$  NMR (600 MHz, Chloroform-*d*)  $\delta$  8.18 (d,  $J = 8.6$  Hz, 2H), 7.36 (d,  $J = 8.5$  Hz, 2H), 3.81 (s, 2H), 2.50 (t,  $J = 7.4$  Hz, 2H), 1.61 – 1.55 (m, 2H), 1.31 – 1.21 (m, 6H), 0.86 (t,  $J = 6.8$  Hz, 3H).

$^{13}\text{C}\{^1\text{H}\}$  NMR (151 MHz, Chloroform-*d*)  $\delta$  206.6, 147.2, 141.8, 130.6, 123.9, 49.4, 43.0, 31.7, 28.9, 23.8, 22.6, 14.1.

The NMR data are in agreement with previously reported.<sup>11</sup>

FT-IR (neat,  $\text{cm}^{-1}$ ): 2953, 2930, 2851, 1711, 1521, 1495, 1349, 1112, 1073, 1013, 750, 709.



HRMS calc. for C<sub>14</sub>H<sub>19</sub>NO<sub>3</sub>: [M-H]<sup>-</sup> 248.1287; found 248.1292.

*1-(4-(trifluoromethyl)phenyl)octan-2-one (12b)*

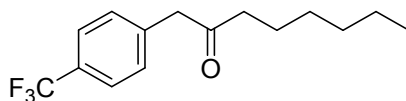

Yield 250 mg, 91%. Yellow oil (lit data: brown liquid).<sup>11</sup>

<sup>1</sup>H NMR (600 MHz, Chloroform-*d*) δ 7.57 (d, *J* = 8.0 Hz, 2H), 7.31 (d, *J* = 7.9 Hz, 2H), 3.75 (s, 2H), 2.47 (t, *J* = 7.4 Hz, 2H), 1.61 – 1.53 (m, 2H), 1.30 – 1.21 (m, 6H), 0.86 (t, *J* = 7.0 Hz, 3H).

<sup>13</sup>C{<sup>1</sup>H} NMR (151 MHz, Chloroform-*d*) δ 207.4, 138.4, 129.9, 129.4 (q, *J* = 32.5 Hz), 125.6 (q, *J* = 3.6 Hz), 124.3 (q, *J* = 271.9 Hz), 49.5, 42.6, 31.6, 28.86, 23.8, 22.5, 14.0.

The NMR data are in agreement with previously reported.<sup>11</sup>

*1-(3-nitrophenyl)octan-2-one (13b)*

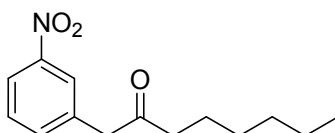

Yield 240 mg, 95%. White needles. M.p. 51-53 °C.

<sup>1</sup>H NMR (600 MHz, Chloroform-*d*) δ 8.13 (d, *J* = 7.5 Hz, 1H), 8.06 (s, 1H), 7.54 – 7.47 (m, 2H), 3.82 (s, 2H), 2.51 (t, *J* = 7.4 Hz, 2H), 1.62 – 1.56 (m, 2H), 1.32 – 1.23 (m, 6H), 0.87 (t, *J* = 6.9 Hz, 3H).

<sup>13</sup>C{<sup>1</sup>H} NMR (151 MHz, Chloroform-*d*) δ 206.9, 136.2, 135.9, 129.5, 124.6, 122.2, 100.1, 49.0, 42.9, 31.7, 28.9, 23.8, 22.6, 14.1.

FT-IR (neat, cm<sup>-1</sup>): 2954, 2928, 2857, 1708, 1521, 1471, 1348, 1126, 1071, 1016, 904, 812, 706.

HRMS calc. for C<sub>14</sub>H<sub>19</sub>NO<sub>3</sub>: [M-H]<sup>-</sup> 248.1287; found 248.1294.

*1-(2-bromophenyl)octan-2-one (14b)*

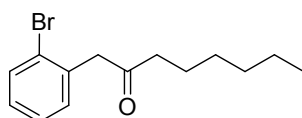

Yield 246 mg, 87%. Yellow oil. (lit data: yellow oil).<sup>10</sup>

$^1\text{H}$  NMR (600 MHz, Chloroform-*d*)  $\delta$  7.60 – 7.54 (m, 1H), 7.31 – 7.25 (m, 1H), 7.23 – 7.19 (m, 1H), 7.15 – 7.11 (m, 1H), 3.85 (s, 2H), 2.49 (t,  $J = 7.4$  Hz, 2H), 1.62 – 1.57 (m, 2H), 1.30 – 1.25 (m, 6H), 0.87 (t,  $J = 6.9$  Hz, 3H).

$^{13}\text{C}$  { $^1\text{H}$ } NMR (151 MHz, Chloroform-*d*)  $\delta$  207.3, 135.0, 132.9, 131.8, 128.8, 127.7, 125.13, 50.1, 42.7, 31.7, 28.9, 23.8, 22.6, 14.2.

The NMR data are in agreement with previously reported.<sup>10</sup>

*1-(2-methoxyphenyl)octan-1-one (15a)*

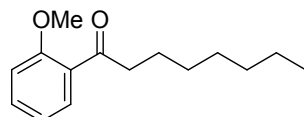

Yield 36 mg, 15.4%. Colorless oil.

$^1\text{H}$  NMR (600 MHz, Chloroform-*d*)  $\delta$  7.64 (dd,  $J = 7.6, 1.8$  Hz, 1H), 7.47 – 7.41 (m, 1H), 7.02 – 6.97 (m, 1H), 6.97 – 6.93 (m, 1H), 3.89 (s, 3H), 2.95 (t,  $J = 7.5$  Hz, 2H), 1.71 – 1.63 (m, 2H), 1.31 – 1.21 (m, 6H), 0.88 (t,  $J = 6.9$  Hz, 3H).

$^{13}\text{C}$  { $^1\text{H}$ } NMR (151 MHz, Chloroform-*d*)  $\delta$  203.6, 158.4, 133.2, 130.2, 120.8, 111.60, 55.61, 43.9, 31.9, 29.5, 24.6, 22.8, 14.2.

The NMR data are in agreement with previously reported.<sup>12</sup>

*1-(2-methoxyphenyl)octan-2-one (15b)*

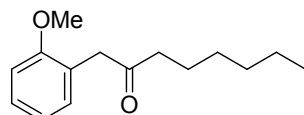

Yield 154 mg, 65.6%. Colorless oil.

$^1\text{H}$  NMR (600 MHz, Chloroform-*d*)  $\delta$  7.28 – 7.22 (m, 1H), 7.12 (d,  $J = 7.34$  Hz, 1H), 6.92 (t,  $J = 7.40$  Hz, 1H), 6.87 (d,  $J = 8.20$  Hz, 1H), 3.80 (s, 3H), 3.66 (s, 2H), 2.42 (t,  $J = 7.42$  Hz, 2H), 1.59 – 1.52 (m, 2H), 1.29 – 1.19 (m, 6H), 0.87 (t,  $J = 7.04$  Hz, 3H).

$^{13}\text{C}$  NMR (151 MHz, Chloroform-*d*)  $\delta$  209.3, 157.5, 131.3, 128.5, 123.9, 120.8, 110.6, 55.4, 44.82, 42.1, 31.7, 29.0, 23.9, 22.6, 14.2.

HRMS calc. for  $\text{C}_{15}\text{H}_{22}\text{O}_2$ :  $[\text{M}+\text{H}]^+$  235.1692; found 235.1692.

*1-(4-chlorophenyl)octan-2-one (16b)*

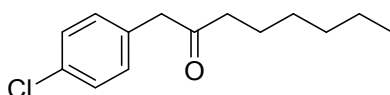

Yield 184 mg, 77%. Colorless oil. (lit data: yellow liquid).<sup>11</sup>

<sup>1</sup>H NMR (600 MHz, Chloroform-*d*)  $\delta$  7.28 (d,  $J = 8.2$  Hz, 2H), 7.12 (d,  $J = 8.2$  Hz, 2H), 3.64 (s, 2H), 2.43 (t,  $J = 7.4$  Hz, 2H), 1.58 – 1.51 (m, 2H), 1.29 – 1.20 (m, 6H), 0.86 (t,  $J = 6.9$  Hz, 3H).

<sup>13</sup>C{<sup>1</sup>H} NMR (151 MHz, Chloroform-*d*)  $\delta$  208.0, 133.0, 132.9, 130.9, 128.8, 49.2, 42.3, 31.6, 28.9, 23.8, 22.6, 14.1.

The NMR data are in agreement with previously reported.<sup>11</sup>

#### Methyl 4-(2-oxooctyl)benzoate (**17b**)

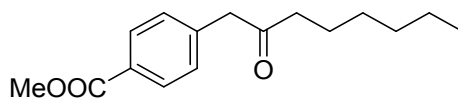

Yield 230 mg, 88%. White solid. M.p. 53-54 °C (lit data: yellow liquid).<sup>11</sup>

<sup>1</sup>H NMR (600 MHz, Chloroform-*d*)  $\delta$  7.99 (d,  $J = 8.3$  Hz, 2H), 7.27 (d,  $J = 8.3$  Hz, 2H), 3.90 (s, 3H), 3.74 (s, 2H), 2.45 (t,  $J = 7.4$  Hz, 2H), 1.57 – 1.50 (m, 2H), 1.30 – 1.19 (m, 6H), 0.85 (t,  $J = 7.1$  Hz, 3H).

<sup>13</sup>C{<sup>1</sup>H} NMR (151 MHz, Chloroform-*d*)  $\delta$  207.7, 167.0, 139.7, 130.1, 129.6, 129.0, 52.2, 50.0, 42.5, 31.7, 28.9, 23.8, 22.6, 14.1.

The NMR data are in agreement with previously reported.<sup>11</sup>

#### Ethyl 4-(2-oxooctyl)benzoate (**18b**)

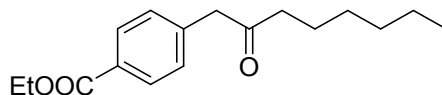

Yield 260 mg, 94%. White solid. M.p. 52 °C

<sup>1</sup>H NMR (600 MHz, Chloroform-*d*)  $\delta$  7.99 (d,  $J = 8.3$  Hz, 2H), 7.28 – 7.23 (m, 2H), 4.35 (q,  $J = 7.1$  Hz, 2H), 3.72 (s, 2H), 2.43 (t,  $J = 7.4$  Hz, 2H), 1.57 – 1.51 (m, 2H), 1.37 (t,  $J = 7.2$  Hz, 3H), 1.26 – 1.19 (m, 6H), 0.84 (t,  $J = 7.1$  Hz, 3H).

<sup>13</sup>C{<sup>1</sup>H} NMR (151 MHz, Chloroform-*d*)  $\delta$  207.6, 166.4, 139.5, 129.9, 129.5, 129.3, 100.1, 61.0, 49.9, 42.4, 31.6, 28.8, 23.7, 22.5, 14.4, 14.1.

HRMS calc. for C<sub>17</sub>H<sub>24</sub>O<sub>3</sub>: [M+H]<sup>+</sup> 277.1798; found 277.1799.

*1-mesityloctan-2-one (19b)*

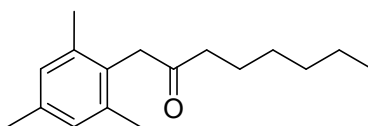

Yield 172.5 mg, 70%. Colorless oil.

$^1\text{H}$  NMR (600 MHz, Chloroform-*d*)  $\delta$  6.88 (s, 2H), 3.72 (s, 2H), 2.41 (t,  $J = 7.4$  Hz, 2H), 2.27 (s, 3H), 2.20 (s, 6H), 1.61 – 1.55 (m, 2H), 1.30 – 1.24 (m, 6H), 0.88 (t,  $J = 7.0$  Hz, 3H).

$^{13}\text{C}\{^1\text{H}\}$  NMR (151 MHz, Chloroform-*d*)  $\delta$  208.9, 136.8, 136.4, 129.3, 129.1, 44.2, 42.1, 31.7, 29.0, 24.0, 22.6, 21.0, 20.5, 14.2.

HRMS calc. for  $\text{C}_{17}\text{H}_{26}\text{O}$ :  $[\text{M}+\text{H}]^+$  247.2056; found 247.2053.

*3,3-dimethyl-1-(4-nitrophenyl)butan-2-one (20b)*

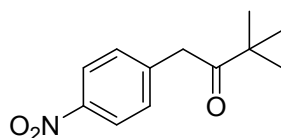

Yield 208 mg, 94%. White solid . M.p. 63-64 °C.

$^1\text{H}$  NMR (600 MHz, Chloroform-*d*)  $\delta$  8.17 (d,  $J = 8.2$  Hz, 2H), 7.37 – 7.29 (m, 2H), 3.91 (s, 2H), 1.23 (s, 9H).

$^{13}\text{C}\{^1\text{H}\}$  NMR (151 MHz, Chloroform-*d*)  $\delta$  211.4, 147.0, 142.7, 130.7, 123.7, 45.0, 43.0, 26.4.

The NMR data are in agreement with previously reported.<sup>13</sup>

*1-(4-methoxyphenyl)-3,3-dimethylbutan-2-one (21b)*

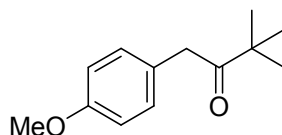

Yield 70 mg, 34%. Colorless oil. (lit data: Colorless oil).<sup>14</sup>

$^1\text{H}$  NMR (600 MHz, Chloroform-*d*)  $\delta$  7.09 (d,  $J = 8.6$  Hz, 2H), 6.85 (d,  $J = 8.6$  Hz, 2H), 3.79 (s, 3H), 3.74 (s, 2H), 1.20 (d,  $J = 1.2$  Hz, 9H).

$^{13}\text{C}\{^1\text{H}\}$  NMR (151 MHz, Chloroform-*d*)  $\delta$  213.4, 158.5, 130.6, 127.1, 114.0, 55.4, 44.7, 42.5, 26.6.

The NMR data are in agreement with previously reported.<sup>14</sup>

*3,3-dimethyl-1-phenylbutan-2-one (22b)*

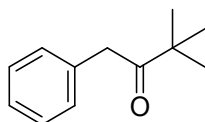

Yield 125 mg, 71%. Colorless oil.

$^1\text{H}$  NMR (600 MHz, Chloroform-*d*)  $\delta$  7.31 (t,  $J = 7.5$  Hz, 2H), 7.26 – 7.22 (m, 1H), 7.18 (d,  $J = 7.3$  Hz, 2H), 3.81 (s, 2H), 1.21 (d,  $J = 1.1$  Hz, 9H).

$^{13}\text{C}\{^1\text{H}\}$  NMR (151 MHz, Chloroform-*d*)  $\delta$  213.0, 135.1, 129.7, 128.5, 126.7, 44.8, 43.4, 26.5.

The NMR data are in agreement with previously reported.<sup>3</sup>

*Acetophenone (23a)*

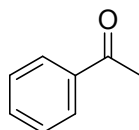

Yield 101 mg, 84%. Colorless oil.

$^1\text{H}$  NMR (600 MHz, Chloroform-*d*)  $\delta$  7.96 (d,  $J = 8.02$  Hz, 2H), 7.56 (t,  $J = 7.40$  Hz, 1H), 7.46 (t,  $J = 7.75$  Hz, 2H), 2.61 (s, 3H).

$^{13}\text{C}\{^1\text{H}\}$  NMR (151 MHz, Chloroform-*d*)  $\delta$  198.3, 137.2, 133.2, 128.7, 128.4, 26.7.

The NMR data are in agreement with previously reported.<sup>15</sup>

## Kinetic experiments

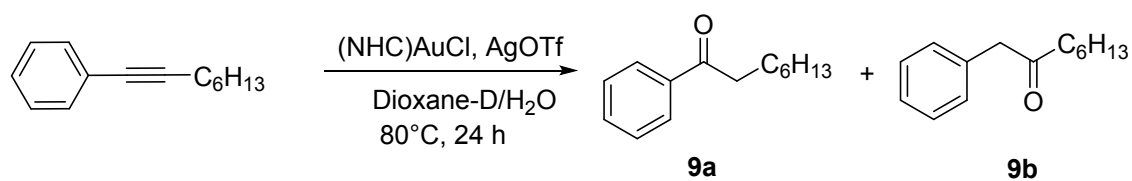

Kinetic experiments were performed in an NMR tube in deuterated 1,4-dioxane under optimized conditions. The mixture composition throughout the reaction was determined by <sup>1</sup>H-NMR. From the obtained results the plot of the reaction selectivity (products ratio) over time was obtained.

### Selectivity during the reaction

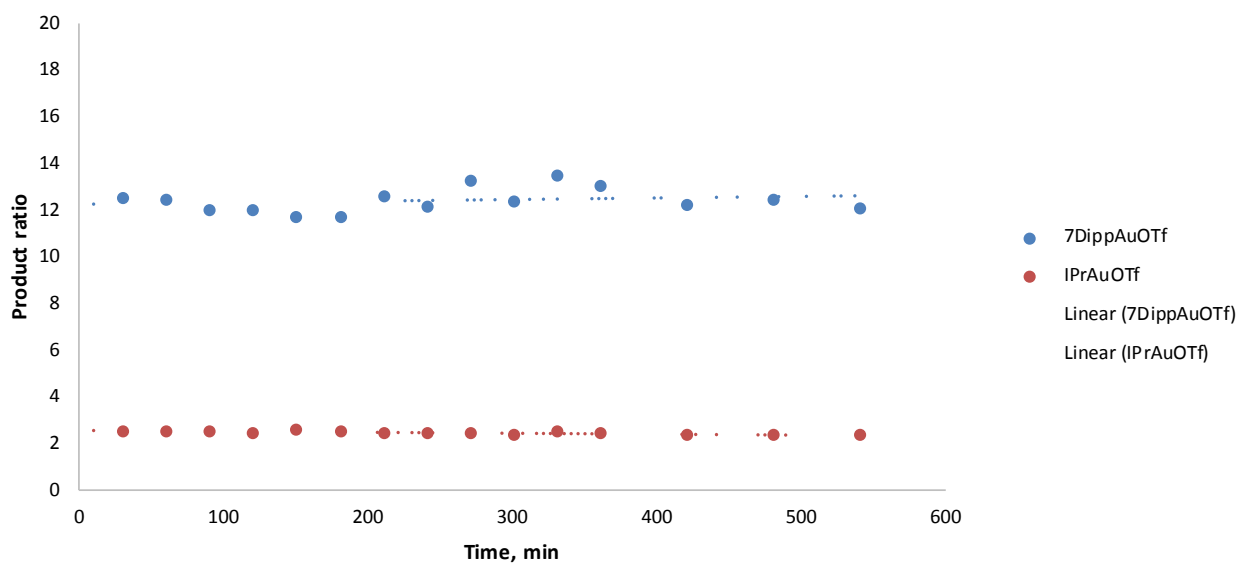

## Computational details

All DFT calculations were performed with the Orca 4.2.1 package.<sup>16</sup> Geometry optimizations were performed at the  $\omega$ B97X-D3<sup>17</sup> level of theory. Gold was described with a def2-SVP basis set<sup>18</sup> in combination with Stuttgart-Dresden (SDD) pseudopotentials,<sup>18</sup> while all other atoms were described with a def2-SVP basis set. Analytical frequency calculations were performed at the same level of theory to characterize all stationary points as either intermediates (no imaginary frequencies) or transition states (exactly one imaginary frequency). The electronic energy was refined through single point calculations at the  $\omega$ B97X-D3 level of theory. Gold was described with a def2-TZVPP basis set<sup>18</sup> in combination with SDD pseudopotentials and all other atoms were described with a def2-TZVPP basis set. For representative structures, solvent effects were taken into consideration in the single point calculations through the use of the CPCM solvation model for 1,4-dioxane ( $\epsilon = 2.25$ ) and water ( $\epsilon = 80.4$ ) as implemented in Orca.<sup>19</sup> For all calculations the RIJCOSX approximation was employed in combination with def2/J auxiliary basis sets.<sup>20</sup> A larger DFT integration (Grid6) and auxiliary (GridX6) grids and very tight convergence thresholds (VeryTightSCF) were used. The optimized structures were visualized with the CYLview software.<sup>21</sup>

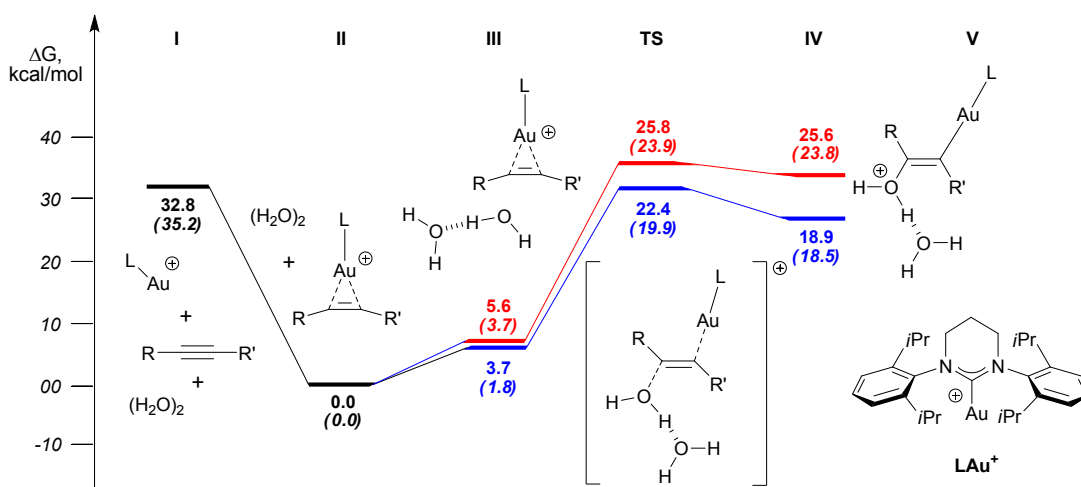

Results summary for water dimer anti-attack (red – Markovnikov, blue – anti-Markovnikov)

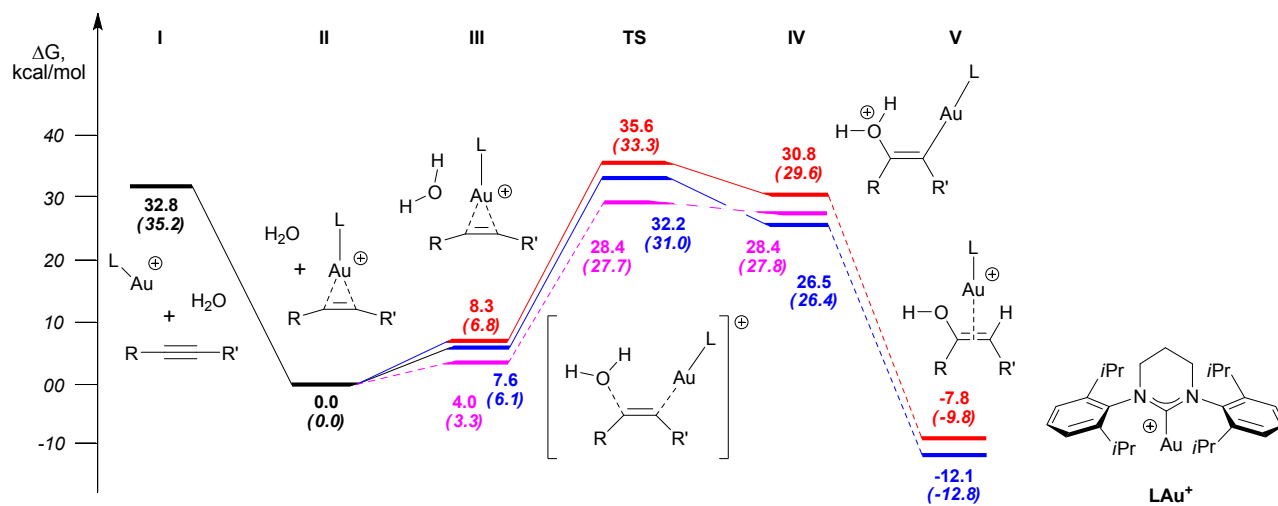

Results summary for water syn-attack (red – Markovnikov, blue – anti-Markovnikov);  
magenta – anti-attack anti-Markovnikov

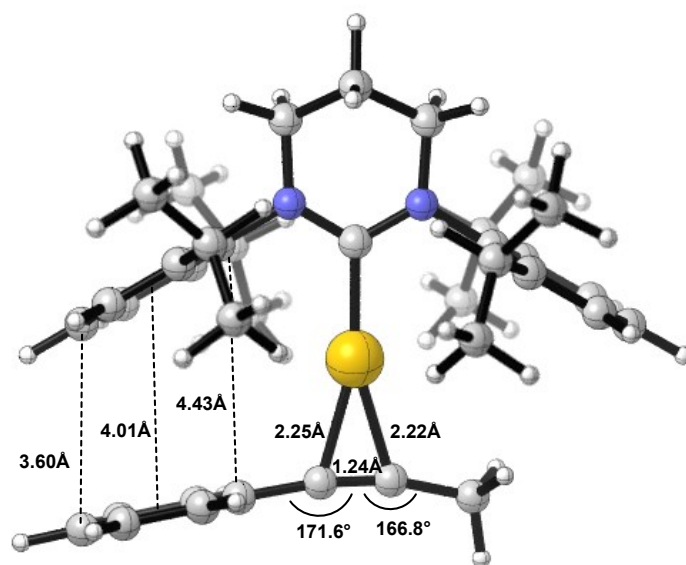

Selected structural parameters of the intermediate II



## Cartesian coordinates and energies of the optimized structures

### Intermediate I-alkyne

$$E(\omega\text{B97X-D3/def2-TZVPP}) = -347.736641 E_h$$

$$E(\omega\text{B97X-D3/def2-TZVPP+CPCM(1,4-dioxane)}) = -347.734228 E_h$$

$$\text{Lowest frequency} = 38.65 \text{ cm}^{-1}$$

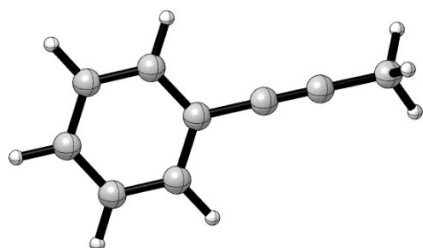

|   |           |           |          |
|---|-----------|-----------|----------|
| C | -7.423599 | -2.446577 | 1.208146 |
| C | -6.326903 | -3.306008 | 1.277132 |
| C | -7.233560 | -1.067983 | 1.177749 |
| C | -5.035905 | -2.779016 | 1.314317 |
| C | -4.839628 | -1.401126 | 1.284247 |
| C | -5.937557 | -0.528440 | 1.215528 |
| C | -5.741001 | 0.898147  | 1.183605 |
| C | -5.584594 | 2.098602  | 1.155427 |
| C | -5.397197 | 3.547098  | 1.119584 |
| H | -6.270876 | 4.066517  | 1.540432 |
| H | -5.259223 | 3.900490  | 0.086578 |
| H | -4.512617 | 3.844300  | 1.702286 |
| H | -3.829884 | -0.985473 | 1.314050 |
| H | -6.478112 | -4.388281 | 1.301411 |
| H | -4.172780 | -3.447511 | 1.367924 |
| H | -8.437460 | -2.853820 | 1.177176 |
| H | -8.090005 | -0.391967 | 1.123166 |

### Intermediate I-water

$$E(\omega\text{B97X-D3/def2-TZVPP}) = -76.442666 E_h$$

$$E(\omega\text{B97X-D3/def2-TZVPP+CPCM}(1,4\text{-dioxane})) = -76.445866 E_h$$

$$\text{Lowest frequency} = 1645.16 \text{ cm}^{-1}$$

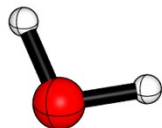

$$\text{O} \quad -8.275200 \quad -3.447308 \quad -1.335146$$

$$\text{H} \quad -7.314830 \quad -3.418811 \quad -1.293169$$

$$\text{H} \quad -8.547499 \quad -2.929231 \quad -0.572014$$

### Intermediate I-water-dimer

$$E(\omega\text{B97X-D3/def2-TZVPP}) = -152.893897 E_h$$

$$E(\omega\text{B97X-D3/def2-TZVPP+CPCM}(1,4\text{-dioxane})) = -152.9008728 E_h$$

$$\text{Lowest frequency} = 64.43 \text{ cm}^{-1}$$

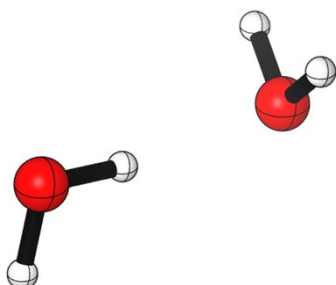

$$\text{O} \quad 0.172365 \quad -0.195997 \quad 0.164291$$

$$\text{H} \quad 1.132474 \quad -0.242987 \quad 0.036113$$

$$\text{H} \quad -0.098269 \quad -1.117957 \quad 0.154687$$

$$\text{O} \quad 3.015896 \quad 0.017087 \quad -0.084190$$

$$\text{H} \quad 3.118725 \quad 0.583212 \quad 0.688752$$

$$\text{H} \quad 3.084829 \quad 0.625282 \quad -0.828333$$

### Intermediate I-6-DippAu

$$E(\omega\text{B97X-D3/def2-TZVPP}) = -1336.324364 E_h$$

$$E(\omega\text{B97X-D3/def2-TZVPP+CPCM}(1,4\text{-dioxane})) = -1336.353664 E_h$$

Lowest frequency = 19.17 cm<sup>-1</sup>

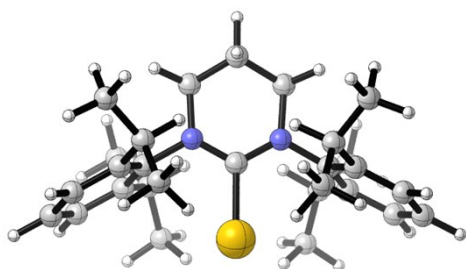

|   |           |           |           |
|---|-----------|-----------|-----------|
| C | -1.253004 | 2.969730  | -2.887150 |
| C | -2.265908 | 1.955833  | -2.391609 |
| H | -1.324266 | 3.068769  | -3.978957 |
| C | 0.145336  | 2.532418  | -2.495982 |
| H | -1.471857 | 3.960474  | -2.456503 |
| H | 0.470598  | 1.652712  | -3.077473 |
| N | 0.199186  | 2.200488  | -1.064433 |
| H | 0.881249  | 3.328332  | -2.674287 |
| C | -0.870214 | 1.809102  | -0.380214 |
| C | 1.495784  | 2.290693  | -0.434721 |
| H | -2.190876 | 1.006864  | -2.950371 |
| H | -3.294553 | 2.323642  | -2.508824 |
| N | -2.058007 | 1.682230  | -0.962666 |
| C | -3.204168 | 1.228785  | -0.209648 |
| C | 2.319773  | 1.149947  | -0.416481 |
| C | 1.899023  | 3.532430  | 0.092740  |
| C | 3.591044  | 1.285615  | 0.149790  |
| C | 3.180978  | 3.611865  | 0.643195  |
| C | 4.020901  | 2.502847  | 0.666674  |
| C | -4.031713 | 2.191710  | 0.397722  |
| C | -3.462135 | -0.152676 | -0.139863 |
| C | -4.584997 | -0.560815 | 0.586926  |
| C | -5.140673 | 1.727962  | 1.110667  |
| C | -5.414853 | 0.367494  | 1.206095  |
| C | 1.874956  | -0.200906 | -0.962145 |
| C | 0.986095  | 4.751198  | 0.109928  |
| H | 3.530751  | 4.558621  | 1.063050  |

|   |           |           |           |
|---|-----------|-----------|-----------|
| H | 5.020896  | 2.587220  | 1.097831  |
| H | 4.260232  | 0.421899  | 0.184533  |
| H | 0.848308  | -0.092401 | -1.348893 |
| C | 1.825739  | -1.256903 | 0.148580  |
| C | 2.756477  | -0.655529 | -2.131140 |
| C | 1.569535  | 5.920731  | -0.691195 |
| H | 0.034885  | 4.469336  | -0.369113 |
| C | 0.651416  | 5.163100  | 1.548794  |
| H | 2.518525  | 6.276227  | -0.260780 |
| H | 0.870428  | 6.770772  | -0.695439 |
| H | 1.766625  | 5.638662  | -1.736805 |
| H | 0.205272  | 4.325959  | 2.109922  |
| H | -0.067575 | 5.996538  | 1.559172  |
| H | 1.548307  | 5.487813  | 2.098323  |
| H | 2.768223  | 0.090131  | -2.940831 |
| H | 2.389584  | -1.606519 | -2.546019 |
| H | 3.798336  | -0.814207 | -1.812898 |
| H | 1.185821  | -0.930462 | 0.984308  |
| H | 2.826343  | -1.461426 | 0.559661  |
| H | 1.422621  | -2.207098 | -0.232910 |
| H | -4.817583 | -1.625913 | 0.667668  |
| H | -6.288869 | 0.027513  | 1.766578  |
| C | -3.751865 | 3.686550  | 0.315118  |
| H | -5.806214 | 2.443568  | 1.599872  |
| C | -2.577814 | -1.190175 | -0.818992 |
| C | -3.389888 | 4.258586  | 1.691110  |
| C | -4.922699 | 4.447781  | -0.318815 |
| H | -2.875512 | 3.832811  | -0.335805 |
| C | -1.948058 | -2.149841 | 0.196040  |
| H | -1.747706 | -0.659169 | -1.311843 |
| C | -3.349776 | -1.947262 | -1.907039 |
| H | -4.159021 | -2.555346 | -1.473771 |
| H | -2.682979 | -2.627912 | -2.458109 |
| H | -3.808935 | -1.257415 | -2.631489 |
| H | -1.355013 | -1.605515 | 0.948407  |

|    |           |           |           |
|----|-----------|-----------|-----------|
| H  | -1.280189 | -2.864032 | -0.309057 |
| H  | -2.711036 | -2.733665 | 0.733464  |
| H  | -5.824814 | 4.399802  | 0.310355  |
| H  | -5.185050 | 4.039073  | -1.306618 |
| H  | -4.668138 | 5.510631  | -0.446941 |
| H  | -2.499477 | 3.762548  | 2.110766  |
| H  | -4.212768 | 4.128243  | 2.410882  |
| H  | -3.173291 | 5.335486  | 1.622793  |
| Au | -0.686659 | 1.395896  | 1.593703  |

## Intermediate II

$E(\omega\text{B97X-D3/def2-TZVPP}) = -1684.142979 E_h$

$E(\omega\text{B97X-D3/def2-TZVPP+CPCM}(1,4\text{-dioxane})) = -1684.166014 E_h$

Lowest frequency = 13.59  $\text{cm}^{-1}$

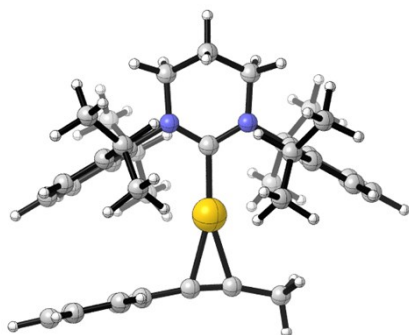

|   |           |          |           |
|---|-----------|----------|-----------|
| C | -1.294090 | 2.893055 | -2.943459 |
| C | -2.262621 | 1.890861 | -2.341052 |
| H | -1.408362 | 2.920047 | -4.035886 |
| C | 0.130897  | 2.518665 | -2.578253 |
| H | -1.523552 | 3.904172 | -2.568839 |
| H | 0.459960  | 1.618473 | -3.126571 |
| N | 0.239844  | 2.273638 | -1.136885 |
| H | 0.833944  | 3.324591 | -2.832358 |
| C | -0.790240 | 1.912541 | -0.368734 |
| C | 1.551419  | 2.399550 | -0.549855 |
| H | -2.182261 | 0.908131 | -2.838301 |
| H | -3.303579 | 2.225882 | -2.451171 |
| N | -1.994915 | 1.729060 | -0.909100 |
| C | -3.092169 | 1.319011 | -0.066137 |

|   |           |           |           |
|---|-----------|-----------|-----------|
| C | 2.389751  | 1.268938  | -0.521820 |
| C | 1.950979  | 3.649496  | -0.037885 |
| C | 3.665920  | 1.421141  | 0.029837  |
| C | 3.237344  | 3.747569  | 0.501233  |
| C | 4.089270  | 2.647637  | 0.530824  |
| C | -3.936200 | 2.311557  | 0.466741  |
| C | -3.280781 | -0.050797 | 0.197179  |
| C | -4.356864 | -0.410797 | 1.013571  |
| C | -4.994631 | 1.897424  | 1.278832  |
| C | -5.207396 | 0.550013  | 1.546870  |
| C | 1.949513  | -0.093145 | -1.041855 |
| C | 1.033036  | 4.864648  | -0.032748 |
| H | 3.582837  | 4.704605  | 0.901401  |
| H | 5.094043  | 2.747740  | 0.947967  |
| H | 4.344007  | 0.564049  | 0.063887  |
| H | 0.913929  | 0.001427  | -1.405171 |
| C | 1.933306  | -1.134926 | 0.082771  |
| C | 2.810544  | -0.550264 | -2.225224 |
| C | 1.598637  | 6.008489  | -0.882681 |
| H | 0.073662  | 4.563506  | -0.482203 |
| C | 0.729225  | 5.322047  | 1.399564  |
| H | 2.556930  | 6.376341  | -0.483948 |
| H | 0.899578  | 6.858472  | -0.899550 |
| H | 1.773938  | 5.692536  | -1.922395 |
| H | 0.290223  | 4.504335  | 1.994067  |
| H | 0.013107  | 6.157968  | 1.398127  |
| H | 1.638199  | 5.664511  | 1.918755  |
| H | 2.793643  | 0.186366  | -3.043184 |
| H | 2.446583  | -1.510295 | -2.621781 |
| H | 3.861865  | -0.691879 | -1.930089 |
| H | 1.302453  | -0.804214 | 0.923143  |
| H | 2.944908  | -1.324379 | 0.474809  |
| H | 1.535493  | -2.094693 | -0.280635 |
| H | -4.531820 | -1.466286 | 1.238050  |
| H | -6.041222 | 0.245931  | 2.183742  |

|    |           |           |           |
|----|-----------|-----------|-----------|
| C  | -3.711773 | 3.796312  | 0.218729  |
| H  | -5.664473 | 2.643371  | 1.714187  |
| C  | -2.368103 | -1.134645 | -0.359426 |
| C  | -3.283869 | 4.506421  | 1.509082  |
| C  | -4.940643 | 4.461819  | -0.410379 |
| H  | -2.879291 | 3.898838  | -0.494633 |
| C  | -1.726299 | -1.959013 | 0.762063  |
| H  | -1.547846 | -0.642300 | -0.905820 |
| C  | -3.117357 | -2.028528 | -1.354430 |
| H  | -3.923538 | -2.590093 | -0.856610 |
| H  | -2.436258 | -2.761753 | -1.813040 |
| H  | -3.576402 | -1.436960 | -2.161133 |
| H  | -1.170815 | -1.316003 | 1.463454  |
| H  | -1.022687 | -2.695991 | 0.346832  |
| H  | -2.480022 | -2.513963 | 1.342254  |
| H  | -5.803534 | 4.447421  | 0.273594  |
| H  | -5.244806 | 3.953502  | -1.338319 |
| H  | -4.729953 | 5.514693  | -0.651635 |
| H  | -2.377951 | 4.045066  | 1.934608  |
| H  | -4.075638 | 4.458222  | 2.273712  |
| H  | -3.067013 | 5.568704  | 1.318459  |
| Au | -0.512489 | 1.639502  | 1.644584  |
| C  | -0.805979 | 1.265312  | 3.841134  |
| C  | 0.400380  | 1.470269  | 3.662005  |
| C  | -2.172113 | 1.019765  | 4.257780  |
| C  | -2.654352 | -0.293324 | 4.360934  |
| C  | -3.007220 | 2.101787  | 4.573578  |
| C  | -3.957441 | -0.516871 | 4.794313  |
| H  | -2.002584 | -1.131692 | 4.106436  |
| C  | -4.308389 | 1.867446  | 5.005393  |
| H  | -2.625872 | 3.121493  | 4.486164  |
| C  | -4.782469 | 0.560141  | 5.119199  |
| H  | -4.330214 | -1.539933 | 4.882491  |
| H  | -4.953773 | 2.710136  | 5.262778  |
| H  | -5.802794 | 0.379876  | 5.466006  |

|   |          |          |          |
|---|----------|----------|----------|
| C | 1.851991 | 1.672349 | 3.783380 |
| H | 2.134369 | 2.675216 | 3.432768 |
| H | 2.148464 | 1.565343 | 4.836496 |
| H | 2.400717 | 0.937492 | 3.177948 |

### Intermediate syn III-aM

$$E(\omega\text{B97X-D3/def2-TZVPP}) = -1760.593591 E_h$$

$$E(\omega\text{B97X-D3/def2-TZVPP+CPCM(1,4-dioxane)}) = -1760.617391 E_h$$

Lowest frequency = 5.13 cm<sup>-1</sup>

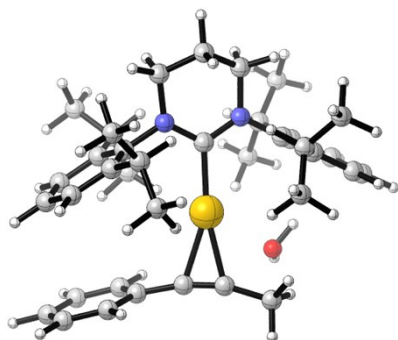

|   |           |          |           |
|---|-----------|----------|-----------|
| C | -0.717159 | 3.014225 | -2.866051 |
| C | -1.722358 | 2.115671 | -2.173497 |
| H | -0.896711 | 3.020439 | -3.949967 |
| C | 0.684112  | 2.517440 | -2.569757 |
| H | -0.831070 | 4.051700 | -2.511357 |
| H | 0.877142  | 1.555234 | -3.075243 |
| N | 0.867237  | 2.356185 | -1.123292 |
| H | 1.444421  | 3.228056 | -2.923294 |
| C | -0.135282 | 2.101471 | -0.275675 |
| C | 2.217479  | 2.456432 | -0.636042 |
| H | -1.765035 | 1.123194 | -2.655419 |
| H | -2.735158 | 2.540191 | -2.216887 |
| N | -1.372138 | 1.954959 | -0.758371 |
| C | -2.447764 | 1.597922 | 0.134728  |
| C | 3.022999  | 1.301954 | -0.643526 |
| C | 2.698150  | 3.712688 | -0.219281 |
| C | 4.343938  | 1.432073 | -0.197378 |
| C | 4.016591  | 3.783048 | 0.241982  |
| C | 4.833506  | 2.656880 | 0.251245  |



|   |           |           |           |
|---|-----------|-----------|-----------|
| C | -3.191815 | 2.623747  | 0.748471  |
| C | -2.722363 | 0.234342  | 0.344346  |
| C | -3.767896 | -0.088872 | 1.214453  |
| C | -4.229924 | 2.245927  | 1.603236  |
| C | -4.515242 | 0.904487  | 1.836060  |
| C | 2.512937  | -0.046611 | -1.136485 |
| C | 1.848537  | 4.975045  | -0.288878 |
| H | 4.419822  | 4.740595  | 0.581785  |
| H | 5.866790  | 2.736840  | 0.597095  |
| H | 5.004978  | 0.560766  | -0.209704 |
| H | 1.428401  | 0.048243  | -1.302711 |
| C | 2.703127  | -1.156253 | -0.096889 |
| C | 3.160514  | -0.417773 | -2.477533 |
| C | 2.474369  | 6.014099  | -1.227787 |
| H | 0.870888  | 4.696682  | -0.711831 |
| C | 1.578777  | 5.564318  | 1.099391  |
| H | 3.443645  | 6.374373  | -0.849366 |
| H | 1.813999  | 6.888854  | -1.327471 |
| H | 2.646066  | 5.601692  | -2.233781 |
| H | 1.047982  | 4.841013  | 1.737745  |
| H | 0.950153  | 6.464537  | 1.023879  |
| H | 2.512440  | 5.852197  | 1.608316  |
| H | 3.007783  | 0.366177  | -3.235320 |
| H | 2.736793  | -1.356145 | -2.866910 |
| H | 4.247152  | -0.561804 | -2.370347 |
| H | 2.251347  | -0.879543 | 0.866418  |
| H | 3.769944  | -1.374144 | 0.074058  |
| H | 2.234108  | -2.089588 | -0.442940 |
| H | -4.002588 | -1.138351 | 1.409211  |
| H | -5.327948 | 0.629052  | 2.512042  |
| C | -2.899099 | 4.099519  | 0.514448  |
| H | -4.825411 | 3.016185  | 2.100640  |
| C | -1.918090 | -0.873950 | -0.323376 |
| C | -2.543778 | 4.820213  | 1.820730  |
| C | -4.060647 | 4.790838  | -0.209173 |

|    |           |           |           |
|----|-----------|-----------|-----------|
| H  | -2.015351 | 4.167496  | -0.139509 |
| C  | -1.028005 | -1.604384 | 0.688545  |
| H  | -1.243681 | -0.405391 | -1.057134 |
| C  | -2.818682 | -1.846951 | -1.094311 |
| H  | -3.460699 | -2.433604 | -0.418778 |
| H  | -2.211603 | -2.562895 | -1.669238 |
| H  | -3.476366 | -1.314968 | -1.798422 |
| H  | -0.327166 | -0.909313 | 1.178564  |
| H  | -0.435179 | -2.387689 | 0.191633  |
| H  | -1.628648 | -2.087233 | 1.475559  |
| H  | -4.977996 | 4.775429  | 0.399915  |
| H  | -4.293428 | 4.299345  | -1.166402 |
| H  | -3.817102 | 5.843746  | -0.418027 |
| H  | -1.720135 | 4.310535  | 2.345305  |
| H  | -3.403414 | 4.864717  | 2.508052  |
| H  | -2.230248 | 5.856134  | 1.619679  |
| Au | 0.140123  | 2.050952  | 1.771060  |
| C  | -0.311090 | 1.792746  | 3.966857  |
| C  | 0.714612  | 2.478665  | 3.903772  |
| C  | -1.487104 | 1.027152  | 4.325990  |
| C  | -1.486174 | -0.369658 | 4.197454  |
| C  | -2.606324 | 1.680328  | 4.862093  |
| C  | -2.590797 | -1.104292 | 4.615324  |
| H  | -0.608676 | -0.870350 | 3.782070  |
| C  | -3.705520 | 0.936490  | 5.280907  |
| H  | -2.602478 | 2.768458  | 4.956602  |
| C  | -3.698141 | -0.453324 | 5.161177  |
| H  | -2.582951 | -2.193235 | 4.526786  |
| H  | -4.573151 | 1.445085  | 5.707472  |
| H  | -4.560144 | -1.034201 | 5.498442  |
| C  | 1.938122  | 3.226147  | 4.223023  |
| H  | 2.024275  | 4.140675  | 3.622786  |
| H  | 1.921258  | 3.498245  | 5.288024  |
| H  | 2.801642  | 2.578971  | 4.017914  |
| H  | 3.424156  | 1.021056  | 1.909066  |

|   |          |           |          |
|---|----------|-----------|----------|
| H | 3.372806 | -0.080991 | 2.962634 |
| O | 2.938213 | 0.734937  | 2.694302 |

### Intermediate syn-III-M

$E(\omega\text{B97X-D3/def2-TZVPP}) = -1760.593680 E_h$

$E(\omega\text{B97X-D3/def2-TZVPP+CPCM}(1,4\text{-dioxane})) = -1760.617448 E_h$

Lowest frequency = 15.01  $\text{cm}^{-1}$

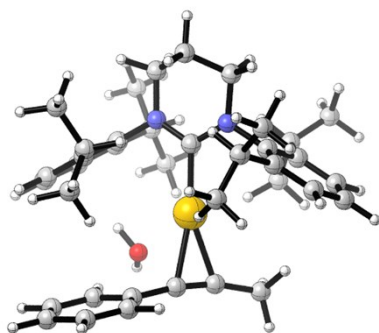

|   |           |           |           |
|---|-----------|-----------|-----------|
| C | -1.365263 | 3.183105  | -2.739758 |
| C | -2.223108 | 1.990328  | -2.365308 |
| H | -1.452666 | 3.392299  | -3.814750 |
| C | 0.077898  | 2.884794  | -2.381966 |
| H | -1.714259 | 4.078262  | -2.199234 |
| H | 0.510763  | 2.131607  | -3.063595 |
| N | 0.168877  | 2.397664  | -1.000613 |
| H | 0.706035  | 3.783929  | -2.458215 |
| C | -0.848521 | 1.846604  | -0.329155 |
| C | 1.463043  | 2.501123  | -0.371005 |
| H | -1.975723 | 1.119072  | -2.996666 |
| H | -3.292936 | 2.196941  | -2.501834 |
| N | -2.010787 | 1.645566  | -0.955818 |
| C | -3.110541 | 1.028006  | -0.260084 |
| C | 2.347245  | 1.410975  | -0.471642 |
| C | 1.798780  | 3.687057  | 0.308762  |
| C | 3.592486  | 1.525780  | 0.154602  |
| C | 3.055402  | 3.750228  | 0.917725  |
| C | 3.944017  | 2.681836  | 0.843596  |
| C | -3.965585 | 1.833325  | 0.518921  |
| C | -3.310483 | -0.356364 | -0.419372 |

|   |           |           |           |
|---|-----------|-----------|-----------|
| C | -4.410851 | -0.931092 | 0.228862  |
| C | -5.030086 | 1.203382  | 1.171444  |
| C | -5.255972 | -0.161569 | 1.024288  |
| C | 1.981751  | 0.124202  | -1.199717 |
| C | 0.841740  | 4.866536  | 0.416769  |
| H | 3.346981  | 4.653347  | 1.460219  |
| H | 4.923127  | 2.753212  | 1.323199  |
| H | 4.301841  | 0.695680  | 0.100137  |
| H | 1.030580  | 0.293487  | -1.729380 |
| C | 1.742245  | -1.018415 | -0.205658 |
| C | 3.028005  | -0.255525 | -2.252734 |
| C | 1.448309  | 6.142626  | -0.177806 |
| H | -0.058192 | 4.624294  | -0.170375 |
| C | 0.384346  | 5.080215  | 1.865249  |
| H | 2.325669  | 6.480614  | 0.395499  |
| H | 0.712863  | 6.961476  | -0.166451 |
| H | 1.772538  | 5.989945  | -1.218702 |
| H | -0.092815 | 4.173652  | 2.270212  |
| H | -0.344858 | 5.902614  | 1.926440  |
| H | 1.232045  | 5.332472  | 2.521454  |
| H | 3.205542  | 0.567804  | -2.960961 |
| H | 2.696034  | -1.133789 | -2.826672 |
| H | 3.994787  | -0.515235 | -1.794292 |
| H | 0.925719  | -0.775538 | 0.493949  |
| H | 2.647175  | -1.226754 | 0.387255  |
| H | 1.468587  | -1.944953 | -0.733087 |
| H | -4.612180 | -1.999166 | 0.107612  |
| H | -6.106364 | -0.630682 | 1.525052  |
| C | -3.798058 | 3.345157  | 0.606877  |
| H | -5.704654 | 1.793833  | 1.795414  |
| C | -2.392369 | -1.222470 | -1.273179 |
| C | -3.976832 | 3.888749  | 2.024781  |
| C | -4.749968 | 4.043129  | -0.375021 |
| H | -2.767678 | 3.587022  | 0.302347  |
| C | -1.867837 | -2.441119 | -0.506112 |

|    |           |           |           |
|----|-----------|-----------|-----------|
| H  | -1.512759 | -0.614806 | -1.538428 |
| C  | -3.086949 | -1.637957 | -2.576703 |
| H  | -3.951771 | -2.290007 | -2.377104 |
| H  | -2.393130 | -2.193868 | -3.225667 |
| H  | -3.457547 | -0.767437 | -3.138964 |
| H  | -1.372606 | -2.137858 | 0.427472  |
| H  | -1.144330 | -2.999009 | -1.119684 |
| H  | -2.678865 | -3.141766 | -0.249972 |
| H  | -5.801401 | 3.855482  | -0.105920 |
| H  | -4.610516 | 3.692535  | -1.409080 |
| H  | -4.589404 | 5.131983  | -0.363646 |
| H  | -3.294202 | 3.398804  | 2.734092  |
| H  | -5.003974 | 3.751977  | 2.396382  |
| H  | -3.770747 | 4.969277  | 2.042667  |
| Au | -0.575939 | 1.420715  | 1.667106  |
| C  | -0.641762 | 1.402702  | 3.942921  |
| C  | 0.458274  | 0.960397  | 3.602881  |
| C  | -1.828924 | 1.963187  | 4.553780  |
| C  | -3.025955 | 1.232551  | 4.597719  |
| C  | -1.768533 | 3.253560  | 5.101982  |
| C  | -4.150497 | 1.796705  | 5.192071  |
| H  | -3.049469 | 0.237716  | 4.148687  |
| C  | -2.900901 | 3.807254  | 5.691492  |
| H  | -0.831901 | 3.814295  | 5.060679  |
| C  | -4.091130 | 3.080320  | 5.736511  |
| H  | -5.083129 | 1.228863  | 5.232059  |
| H  | -2.854657 | 4.810252  | 6.121101  |
| H  | -4.977855 | 3.517228  | 6.201926  |
| C  | 1.814709  | 0.400428  | 3.531862  |
| H  | 2.468578  | 1.032728  | 2.913642  |
| H  | 2.232748  | 0.337280  | 4.546725  |
| H  | 1.792693  | -0.607617 | 3.095104  |
| H  | -2.872076 | -1.080402 | 1.987521  |
| H  | -2.203915 | -2.087170 | 2.917602  |
| O  | -2.148743 | -1.172131 | 2.622758  |

## Intermediate anti-III-aM

$$E(\omega\text{B97X-D3/def2-TZVPP}) = -1837.049888 E_h$$

$$E(\omega\text{B97X-D3/def2-TZVPP+CPCM(1,4-dioxane)}) = -1837.076734 E_h$$

Lowest frequency = 8.46 cm<sup>-1</sup>

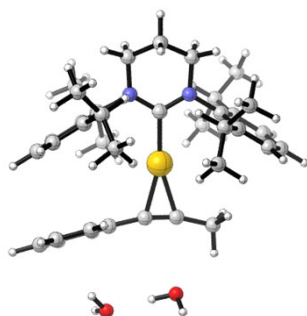

|   |           |           |           |
|---|-----------|-----------|-----------|
| C | -0.533896 | 3.046944  | -3.091688 |
| C | -1.727393 | 2.451275  | -2.365428 |
| H | -0.737897 | 3.109385  | -4.169423 |
| C | 0.698169  | 2.194877  | -2.846410 |
| H | -0.358274 | 4.074362  | -2.733708 |
| H | 0.637444  | 1.242474  | -3.401132 |
| N | 0.850326  | 1.912026  | -1.416138 |
| H | 1.610828  | 2.706052  | -3.184184 |
| C | -0.156065 | 1.952033  | -0.540176 |
| C | 2.168536  | 1.559989  | -0.946096 |
| H | -2.036586 | 1.495353  | -2.823697 |
| H | -2.595618 | 3.123640  | -2.401790 |
| N | -1.393676 | 2.224952  | -0.956433 |
| C | -2.453998 | 2.328341  | 0.016999  |
| C | 2.563784  | 0.211225  | -1.007122 |
| C | 3.006782  | 2.570041  | -0.433790 |
| C | 3.839713  | -0.115283 | -0.537106 |
| C | 4.273830  | 2.190364  | 0.018547  |
| C | 4.688923  | 0.863339  | -0.032300 |
| C | -2.769920 | 3.604760  | 0.520190  |
| C | -3.124718 | 1.165440  | 0.436467  |
| C | -4.133318 | 1.310856  | 1.394870  |
| C | -3.792053 | 3.696829  | 1.467307  |

|   |           |           |           |
|---|-----------|-----------|-----------|
| C | -4.467981 | 2.561089  | 1.901387  |
| C | 1.649688  | -0.882158 | -1.542014 |
| C | 2.582862  | 4.030407  | -0.352962 |
| H | 4.951936  | 2.948475  | 0.418864  |
| H | 5.685033  | 0.589979  | 0.323602  |
| H | 4.176683  | -1.154826 | -0.566892 |
| H | 0.707290  | -0.409826 | -1.859557 |
| C | 1.290267  | -1.892571 | -0.447798 |
| C | 2.258229  | -1.568179 | -2.770591 |
| C | 3.410920  | 4.905705  | -1.302047 |
| H | 1.531371  | 4.094982  | -0.674091 |
| C | 2.644708  | 4.556096  | 1.085423  |
| H | 4.470014  | 4.933669  | -1.001572 |
| H | 3.038092  | 5.941375  | -1.299184 |
| H | 3.373202  | 4.533502  | -2.337121 |
| H | 2.032184  | 3.941537  | 1.764614  |
| H | 2.272181  | 5.590280  | 1.136217  |
| H | 3.674915  | 4.558942  | 1.473984  |
| H | 2.514103  | -0.838371 | -3.553810 |
| H | 1.555448  | -2.299180 | -3.198487 |
| H | 3.181148  | -2.110794 | -2.513102 |
| H | 0.829956  | -1.394927 | 0.420852  |
| H | 2.180106  | -2.434584 | -0.091271 |
| H | 0.578086  | -2.639629 | -0.830359 |
| H | -4.671388 | 0.428328  | 1.749893  |
| H | -5.263723 | 2.651370  | 2.644698  |
| C | -2.017569 | 4.853264  | 0.083370  |
| H | -4.062131 | 4.673668  | 1.877699  |
| C | -2.799534 | -0.213520 | -0.118611 |
| C | -1.209157 | 5.442840  | 1.243972  |
| C | -2.949980 | 5.890504  | -0.550097 |
| H | -1.290190 | 4.552970  | -0.685154 |
| C | -2.454429 | -1.208799 | 0.993508  |
| H | -1.903334 | -0.118546 | -0.752021 |
| C | -3.942071 | -0.726552 | -1.003601 |

|    |           |           |           |
|----|-----------|-----------|-----------|
| H  | -4.870198 | -0.850150 | -0.423666 |
| H  | -3.689710 | -1.704507 | -1.441130 |
| H  | -4.159415 | -0.029740 | -1.827467 |
| H  | -1.631962 | -0.830725 | 1.621594  |
| H  | -2.141735 | -2.174300 | 0.568122  |
| H  | -3.315715 | -1.401881 | 1.651669  |
| H  | -3.670908 | 6.290324  | 0.179811  |
| H  | -3.527919 | 5.458332  | -1.381173 |
| H  | -2.372662 | 6.741202  | -0.942853 |
| H  | -0.519248 | 4.695071  | 1.666346  |
| H  | -1.866241 | 5.793182  | 2.055337  |
| H  | -0.611035 | 6.303021  | 0.906038  |
| Au | 0.201952  | 1.565833  | 1.445250  |
| C  | 0.013542  | 1.236359  | 3.630354  |
| C  | 1.207361  | 1.054345  | 3.366259  |
| C  | -1.302581 | 1.373177  | 4.220733  |
| C  | -2.032623 | 0.228059  | 4.569044  |
| C  | -1.831499 | 2.644880  | 4.481930  |
| C  | -3.275296 | 0.357412  | 5.183878  |
| H  | -1.613563 | -0.759768 | 4.365309  |
| C  | -3.071094 | 2.765904  | 5.105709  |
| H  | -1.262925 | 3.533508  | 4.199554  |
| C  | -3.793961 | 1.624437  | 5.458050  |
| H  | -3.840707 | -0.536734 | 5.457020  |
| H  | -3.478628 | 3.758437  | 5.311967  |
| H  | -4.766150 | 1.722900  | 5.946778  |
| O  | 1.785078  | 1.291393  | 6.311962  |
| C  | 2.648833  | 0.795194  | 3.401121  |
| H  | 2.897679  | -0.125083 | 2.854741  |
| H  | 2.904657  | 0.700366  | 4.467769  |
| H  | 3.208876  | 1.626763  | 2.951651  |
| H  | 0.900729  | 1.180514  | 6.704185  |
| H  | 2.227485  | 1.885474  | 6.924931  |
| O  | -0.764767 | 1.269027  | 7.489341  |
| H  | -1.371085 | 1.852743  | 7.017967  |



H -1.264251 0.454797 7.609418

### Intermediate anti-III-M

$E(\omega\text{B97X-D3/def2-TZVPP}) = -1837.050822 E_h$

$E(\omega\text{B97X-D3/def2-TZVPP+CPCM(1,4-dioxane)}) = -1837.076924 E_h$

Lowest frequency = 7.51  $\text{cm}^{-1}$

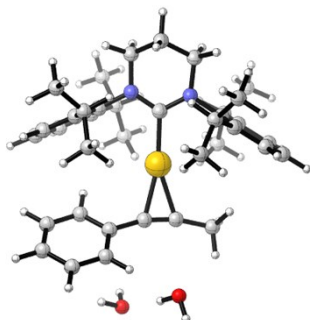

|   |           |           |           |
|---|-----------|-----------|-----------|
| C | -0.877085 | 3.018442  | -3.019079 |
| C | -1.783733 | 1.949118  | -2.440186 |
| H | -1.050066 | 3.115643  | -4.099705 |
| C | 0.571611  | 2.656322  | -2.751999 |
| H | -1.110692 | 3.994144  | -2.562044 |
| H | 0.884586  | 1.790395  | -3.361569 |
| N | 0.760182  | 2.342374  | -1.332645 |
| H | 1.246582  | 3.487081  | -3.001424 |
| C | -0.213294 | 1.886661  | -0.540401 |
| C | 2.095616  | 2.489687  | -0.807767 |
| H | -1.706612 | 1.008587  | -3.013645 |
| H | -2.837664 | 2.260124  | -2.468494 |
| N | -1.434067 | 1.688509  | -1.039591 |
| C | -2.472871 | 1.120653  | -0.217040 |
| C | 2.959092  | 1.377804  | -0.831321 |
| C | 2.492898  | 3.745507  | -0.309758 |
| C | 4.260674  | 1.558910  | -0.353158 |
| C | 3.803792  | 3.871610  | 0.159821  |
| C | 4.682560  | 2.792793  | 0.130953  |
| C | -3.370924 | 1.986213  | 0.435601  |
| C | -2.582229 | -0.281102 | -0.139269 |
| C | -3.638829 | -0.808480 | 0.610758  |

|   |           |           |           |
|---|-----------|-----------|-----------|
| C | -4.415337 | 1.407292  | 1.162179  |
| C | -4.553530 | 0.025667  | 1.244719  |
| C | 2.521045  | 0.010416  | -1.339958 |
| C | 1.540351  | 4.931072  | -0.235965 |
| H | 4.146097  | 4.832850  | 0.552209  |
| H | 5.706547  | 2.914386  | 0.491991  |
| H | 4.959972  | 0.718574  | -0.361786 |
| H | 1.448360  | 0.069054  | -1.582042 |
| C | 2.671144  | -1.062876 | -0.256468 |
| C | 3.259009  | -0.374993 | -2.627730 |
| C | 2.057122  | 6.136983  | -1.028609 |
| H | 0.586088  | 4.622564  | -0.691127 |
| C | 1.239547  | 5.299746  | 1.222381  |
| H | 2.993239  | 6.532515  | -0.604580 |
| H | 1.318571  | 6.953046  | -1.011598 |
| H | 2.253315  | 5.878681  | -2.080560 |
| H | 0.840925  | 4.436794  | 1.779395  |
| H | 0.494621  | 6.108527  | 1.273892  |
| H | 2.144514  | 5.644076  | 1.746893  |
| H | 3.125855  | 0.387060  | -3.411126 |
| H | 2.883120  | -1.333563 | -3.017162 |
| H | 4.341031  | -0.486800 | -2.456145 |
| H | 2.108442  | -0.792225 | 0.651034  |
| H | 3.724127  | -1.210389 | 0.029513  |
| H | 2.287340  | -2.030845 | -0.612180 |
| H | -3.756940 | -1.892561 | 0.688757  |
| H | -5.384486 | -0.407450 | 1.807510  |
| C | -3.224354 | 3.501312  | 0.394229  |
| H | -5.134812 | 2.050426  | 1.674931  |
| C | -1.612945 | -1.219788 | -0.844854 |
| C | -2.815224 | 4.048982  | 1.768328  |
| C | -4.492451 | 4.186069  | -0.129988 |
| H | -2.407746 | 3.739882  | -0.305069 |
| C | -0.911672 | -2.157071 | 0.143454  |
| H | -0.827853 | -0.604803 | -1.311180 |

|    |           |           |           |
|----|-----------|-----------|-----------|
| C  | -2.311000 | -2.001557 | -1.964743 |
| H  | -3.069682 | -2.689386 | -1.559590 |
| H  | -1.584140 | -2.604329 | -2.531009 |
| H  | -2.820914 | -1.328973 | -2.671537 |
| H  | -0.380859 | -1.591008 | 0.925474  |
| H  | -0.177366 | -2.788094 | -0.379950 |
| H  | -1.624788 | -2.831593 | 0.642319  |
| H  | -5.340395 | 4.056946  | 0.560479  |
| H  | -4.796971 | 3.783169  | -1.108231 |
| H  | -4.327924 | 5.267999  | -0.244832 |
| H  | -1.861912 | 3.614112  | 2.108356  |
| H  | -3.571444 | 3.818504  | 2.535550  |
| H  | -2.692853 | 5.142173  | 1.732204  |
| Au | 0.204131  | 1.573726  | 1.447865  |
| C  | 0.158197  | 1.427364  | 3.661109  |
| C  | 1.356653  | 1.389345  | 3.354346  |
| C  | -1.098614 | 1.602896  | 4.363178  |
| C  | -2.274339 | 0.963983  | 3.949877  |
| C  | -1.113767 | 2.460939  | 5.476060  |
| C  | -3.459016 | 1.180264  | 4.649933  |
| H  | -2.263659 | 0.307039  | 3.075243  |
| C  | -2.305287 | 2.672831  | 6.163363  |
| H  | -0.175375 | 2.917086  | 5.801492  |
| C  | -3.478631 | 2.036223  | 5.750560  |
| H  | -4.374428 | 0.679981  | 4.326486  |
| H  | -2.320940 | 3.342911  | 7.026466  |
| H  | -4.411737 | 2.208857  | 6.292456  |
| C  | 2.820330  | 1.333037  | 3.316786  |
| H  | 3.172244  | 0.366575  | 2.930131  |
| H  | 3.144670  | 1.468731  | 4.360900  |
| H  | 3.233268  | 2.135036  | 2.687993  |
| H  | 1.470731  | 1.222756  | 6.550074  |
| H  | 2.425311  | 2.291667  | 7.086769  |
| O  | 2.019953  | 1.980667  | 6.272123  |
| O  | 0.207634  | -0.016236 | 7.012796  |

|   |           |           |          |
|---|-----------|-----------|----------|
| H | 0.089593  | -0.772459 | 6.428274 |
| H | -0.660533 | 0.403673  | 7.038224 |

### Intermediate syn-TS-aM

$E(\omega\text{B97X-D3/def2-TZVPP}) = -1760.554803 E_h$

$E(\omega\text{B97X-D3/def2-TZVPP+CPCM}(1,4\text{-dioxane})) = -1760.579141 E_h$

Lowest frequency =  $-161.52 \text{ cm}^{-1}$

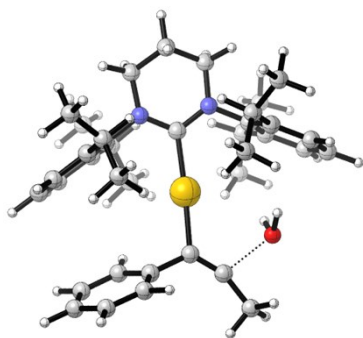

|   |           |           |           |
|---|-----------|-----------|-----------|
| C | -0.799696 | 2.988089  | -2.993733 |
| C | -1.767255 | 2.002274  | -2.367533 |
| H | -0.968647 | 3.046329  | -4.077730 |
| C | 0.626262  | 2.557261  | -2.706827 |
| H | -0.974208 | 3.996084  | -2.583175 |
| H | 0.882583  | 1.636183  | -3.259875 |
| N | 0.798941  | 2.328132  | -1.269699 |
| H | 1.346704  | 3.328726  | -3.012944 |
| C | -0.194839 | 1.940942  | -0.460155 |
| C | 2.128956  | 2.488675  | -0.742697 |
| H | -1.764661 | 1.041832  | -2.912237 |
| H | -2.797200 | 2.386005  | -2.393502 |
| N | -1.418126 | 1.762069  | -0.964133 |
| C | -2.475308 | 1.269757  | -0.111824 |
| C | 2.983923  | 1.370312  | -0.697665 |
| C | 2.540907  | 3.765221  | -0.312102 |
| C | 4.285088  | 1.562297  | -0.218377 |
| C | 3.849596  | 3.902474  | 0.166464  |
| C | 4.718564  | 2.815066  | 0.204685  |
| C | -3.286279 | 2.193416  | 0.575019  |
| C | -2.671221 | -0.120588 | -0.013645 |

|   |           |           |           |
|---|-----------|-----------|-----------|
| C | -3.718440 | -0.574804 | 0.793843  |
| C | -4.314947 | 1.686348  | 1.373243  |
| C | -4.535101 | 0.317831  | 1.478287  |
| C | 2.538235  | -0.020360 | -1.128340 |
| C | 1.606668  | 4.966858  | -0.314375 |
| H | 4.200163  | 4.882012  | 0.502513  |
| H | 5.739887  | 2.944246  | 0.569708  |
| H | 4.975629  | 0.715847  | -0.179326 |
| H | 1.469036  | 0.033021  | -1.384825 |
| C | 2.670199  | -1.025109 | 0.021577  |
| C | 3.291118  | -0.485119 | -2.380818 |
| C | 2.179299  | 6.145713  | -1.108035 |
| H | 0.671064  | 4.660321  | -0.806204 |
| C | 1.244132  | 5.373652  | 1.119234  |
| H | 3.097383  | 6.543095  | -0.648256 |
| H | 1.451251  | 6.969798  | -1.146588 |
| H | 2.423022  | 5.859431  | -2.142364 |
| H | 0.793931  | 4.530887  | 1.668307  |
| H | 0.517806  | 6.200215  | 1.119191  |
| H | 2.131742  | 5.711757  | 1.677715  |
| H | 3.167197  | 0.227623  | -3.210345 |
| H | 2.919981  | -1.465362 | -2.715889 |
| H | 4.370937  | -0.586359 | -2.190914 |
| H | 2.083489  | -0.705100 | 0.898481  |
| H | 3.717938  | -1.155187 | 0.334580  |
| H | 2.293768  | -2.014067 | -0.278278 |
| H | -3.897673 | -1.649029 | 0.887792  |
| H | -5.350319 | -0.055530 | 2.102487  |
| C | -3.070154 | 3.698397  | 0.500365  |
| H | -4.955784 | 2.376015  | 1.928170  |
| C | -1.780252 | -1.129061 | -0.725249 |
| C | -2.674049 | 4.260877  | 1.871046  |
| C | -4.298411 | 4.419858  | -0.068054 |
| H | -2.229479 | 3.886504  | -0.186176 |
| C | -0.969373 | -1.953160 | 0.281534  |

|    |           |           |           |
|----|-----------|-----------|-----------|
| H  | -1.055852 | -0.566517 | -1.334903 |
| C  | -2.582758 | -2.026199 | -1.674936 |
| H  | -3.284319 | -2.672395 | -1.125055 |
| H  | -1.912629 | -2.684154 | -2.249053 |
| H  | -3.172280 | -1.433026 | -2.390222 |
| H  | -0.365813 | -1.302597 | 0.934170  |
| H  | -0.287642 | -2.643017 | -0.239010 |
| H  | -1.623269 | -2.560601 | 0.926580  |
| H  | -5.166599 | 4.328907  | 0.602969  |
| H  | -4.592982 | 4.011668  | -1.046949 |
| H  | -4.093185 | 5.493518  | -0.195252 |
| H  | -1.752754 | 3.787860  | 2.245820  |
| H  | -3.459576 | 4.080621  | 2.621385  |
| H  | -2.503570 | 5.346871  | 1.815339  |
| Au | 0.118105  | 1.712966  | 1.559291  |
| C  | 0.286971  | 1.633186  | 3.642677  |
| C  | 1.378901  | 1.776172  | 4.284307  |
| C  | -1.039576 | 1.541588  | 4.335967  |
| C  | -1.870664 | 0.437172  | 4.113697  |
| C  | -1.470208 | 2.571743  | 5.180580  |
| C  | -3.102331 | 0.352904  | 4.757152  |
| H  | -1.552619 | -0.354974 | 3.431253  |
| C  | -2.715124 | 2.490932  | 5.803165  |
| H  | -0.837595 | 3.450075  | 5.332805  |
| C  | -3.530486 | 1.378893  | 5.599405  |
| H  | -3.737990 | -0.519071 | 4.587535  |
| H  | -3.046538 | 3.302758  | 6.455036  |
| H  | -4.501977 | 1.313905  | 6.094503  |
| C  | 2.255166  | 1.891302  | 5.436915  |
| H  | 2.781052  | 2.854202  | 5.473127  |
| H  | 1.571623  | 1.831602  | 6.302821  |
| H  | 2.978120  | 1.068053  | 5.500210  |
| H  | 2.991722  | 2.708310  | 2.384627  |
| H  | 2.948219  | 1.193239  | 2.269877  |
| O  | 3.030230  | 1.902731  | 2.923697  |

## Intermediate syn-TS-M

$$E(\omega\text{B97X-D3/def2-TZVPP}) = -1760.551570 E_h$$

$$E(\omega\text{B97X-D3/def2-TZVPP+CPCM(1,4-dioxane)}) = -1760.574215 E_h$$

$$\text{Lowest frequency} = -198.96 \text{ cm}^{-1}$$

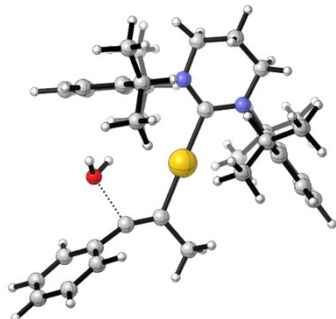

|   |           |           |           |
|---|-----------|-----------|-----------|
| C | -1.065794 | 2.993191  | -3.240127 |
| C | -2.013650 | 1.889826  | -2.807872 |
| H | -1.077469 | 3.097294  | -4.333859 |
| C | 0.338299  | 2.671861  | -2.762593 |
| H | -1.398558 | 3.956175  | -2.819025 |
| H | 0.779087  | 1.846380  | -3.349045 |
| N | 0.329057  | 2.302492  | -1.343110 |
| H | 1.006844  | 3.537107  | -2.876644 |
| C | -0.741503 | 1.839911  | -0.691135 |
| C | 1.582567  | 2.432959  | -0.639909 |
| H | -1.804533 | 0.952068  | -3.353105 |
| H | -3.060200 | 2.155594  | -3.012291 |
| N | -1.882701 | 1.652959  | -1.366975 |
| C | -3.055064 | 1.176234  | -0.681389 |
| C | 2.466389  | 1.338443  | -0.629207 |
| C | 1.883810  | 3.650508  | -0.000936 |
| C | 3.676122  | 1.485880  | 0.055781  |
| C | 3.107093  | 3.746616  | 0.668304  |
| C | 3.995759  | 2.676949  | 0.697553  |
| C | -3.951639 | 2.116075  | -0.135676 |
| C | -3.288467 | -0.210825 | -0.609239 |
| C | -4.460069 | -0.644438 | 0.023241  |
| C | -5.110116 | 1.631368  | 0.483403  |
| C | -5.367926 | 0.264855  | 0.556409  |

|   |           |           |           |
|---|-----------|-----------|-----------|
| C | 2.130260  | 0.008572  | -1.289262 |
| C | 0.926578  | 4.834136  | 0.003598  |
| H | 3.370819  | 4.677129  | 1.178089  |
| H | 4.946907  | 2.772188  | 1.226499  |
| H | 4.380925  | 0.650795  | 0.090473  |
| H | 1.179479  | 0.131079  | -1.832060 |
| C | 1.904787  | -1.077353 | -0.230669 |
| C | 3.191282  | -0.408291 | -2.312925 |
| C | 1.534671  | 6.056244  | -0.694291 |
| H | 0.028236  | 4.542432  | -0.563151 |
| C | 0.465861  | 5.168068  | 1.427795  |
| H | 2.431403  | 6.419054  | -0.168063 |
| H | 0.811095  | 6.885339  | -0.724778 |
| H | 1.831508  | 5.825087  | -1.728807 |
| H | 0.008455  | 4.289430  | 1.910685  |
| H | -0.280284 | 5.977628  | 1.417100  |
| H | 1.306401  | 5.497865  | 2.058569  |
| H | 3.343251  | 0.368731  | -3.077698 |
| H | 2.893585  | -1.336779 | -2.823454 |
| H | 4.164982  | -0.597890 | -1.835234 |
| H | 1.131618  | -0.771636 | 0.492091  |
| H | 2.827552  | -1.281804 | 0.334686  |
| H | 1.584450  | -2.021454 | -0.697743 |
| H | -4.670293 | -1.714839 | 0.094387  |
| H | -6.281337 | -0.094486 | 1.036221  |
| C | -3.687952 | 3.614515  | -0.179003 |
| H | -5.831982 | 2.336226  | 0.905270  |
| C | -2.323783 | -1.230190 | -1.197998 |
| C | -3.462638 | 4.177315  | 1.229881  |
| C | -4.799517 | 4.366951  | -0.919102 |
| H | -2.753900 | 3.771414  | -0.738145 |
| C | -1.826420 | -2.220740 | -0.141192 |
| H | -1.440779 | -0.683809 | -1.563653 |
| C | -2.958664 | -1.953524 | -2.392228 |
| H | -3.819539 | -2.563525 | -2.076112 |



|    |           |           |           |
|----|-----------|-----------|-----------|
| H  | -2.233217 | -2.627343 | -2.872948 |
| H  | -3.320711 | -1.241964 | -3.149891 |
| H  | -1.340647 | -1.701503 | 0.700458  |
| H  | -1.090105 | -2.911497 | -0.578730 |
| H  | -2.647039 | -2.832875 | 0.264191  |
| H  | -5.759727 | 4.304958  | -0.383670 |
| H  | -4.956901 | 3.963452  | -1.930961 |
| H  | -4.545063 | 5.433273  | -1.014480 |
| H  | -2.623458 | 3.668642  | 1.731884  |
| H  | -4.360602 | 4.065978  | 1.859138  |
| H  | -3.225997 | 5.251227  | 1.186428  |
| Au | -0.653007 | 1.494595  | 1.344703  |
| C  | -1.597824 | 1.141843  | 4.164887  |
| C  | -0.564959 | 1.302756  | 3.415773  |
| C  | -2.322430 | 1.233598  | 5.398680  |
| C  | -2.954861 | 0.120423  | 5.982664  |
| C  | -2.324845 | 2.472001  | 6.066047  |
| C  | -3.568622 | 0.248590  | 7.220402  |
| H  | -2.962832 | -0.831443 | 5.448634  |
| C  | -2.927226 | 2.586574  | 7.315155  |
| H  | -1.842767 | 3.333960  | 5.598618  |
| C  | -3.548615 | 1.477713  | 7.887962  |
| H  | -4.062793 | -0.611920 | 7.676205  |
| H  | -2.918802 | 3.544544  | 7.839702  |
| H  | -4.027991 | 1.569794  | 8.865555  |
| C  | 0.795609  | 1.502304  | 4.073043  |
| H  | 1.224178  | 2.459861  | 3.743684  |
| H  | 0.750823  | 1.489241  | 5.171974  |
| H  | 1.481793  | 0.712901  | 3.735004  |
| H  | -3.760235 | 1.287209  | 2.692898  |
| H  | -2.855070 | 0.162699  | 2.190229  |
| O  | -3.212655 | 0.551175  | 3.004614  |

### Intermediate anti-TS-aM

$$E(\omega\text{B97X-D3/def2-TZVPP}) = -1837.026473 E_h$$

$E(\omega\text{B97X-D3/def2-TZVPP+CPCM(1,4-dioxane)}) = -1837.052539 E_h$

Lowest frequency =  $-285.18 \text{ cm}^{-1}$

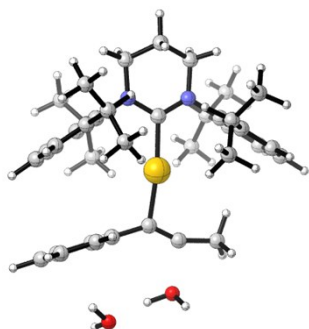

|   |           |           |           |
|---|-----------|-----------|-----------|
| C | -0.529494 | 2.972022  | -3.148696 |
| C | -1.738831 | 2.435942  | -2.402057 |
| H | -0.729114 | 2.993362  | -4.228937 |
| C | 0.682432  | 2.103762  | -2.861342 |
| H | -0.329805 | 4.009342  | -2.834248 |
| H | 0.593376  | 1.123635  | -3.362126 |
| N | 0.833103  | 1.898794  | -1.418008 |
| H | 1.605429  | 2.571193  | -3.232763 |
| C | -0.176614 | 1.982278  | -0.546893 |
| C | 2.149775  | 1.579178  | -0.924681 |
| H | -2.078503 | 1.476269  | -2.830671 |
| H | -2.586407 | 3.133204  | -2.461057 |
| N | -1.410595 | 2.246012  | -0.987577 |
| C | -2.474305 | 2.369568  | -0.019907 |
| C | 2.551301  | 0.231684  | -0.898993 |
| C | 2.981709  | 2.621270  | -0.471226 |
| C | 3.825954  | -0.059812 | -0.402424 |
| C | 4.248107  | 2.277546  | 0.010796  |
| C | 4.669117  | 0.951553  | 0.045146  |
| C | -2.763335 | 3.647043  | 0.495503  |
| C | -3.155358 | 1.215148  | 0.405217  |
| C | -4.135850 | 1.367268  | 1.391135  |
| C | -3.755214 | 3.746327  | 1.474121  |
| C | -4.432018 | 2.616999  | 1.923122  |
| C | 1.646452  | -0.897809 | -1.370175 |
| C | 2.549074  | 4.080564  | -0.485055 |

|   |           |           |           |
|---|-----------|-----------|-----------|
| H | 4.919973  | 3.062563  | 0.367159  |
| H | 5.665048  | 0.704846  | 0.420868  |
| H | 4.166515  | -1.098031 | -0.366024 |
| H | 0.705876  | -0.450934 | -1.727147 |
| C | 1.279698  | -1.836035 | -0.215945 |
| C | 2.272801  | -1.658735 | -2.544791 |
| C | 3.357728  | 4.890544  | -1.506043 |
| H | 1.492859  | 4.114395  | -0.793573 |
| C | 2.625136  | 4.706722  | 0.911552  |
| H | 4.422401  | 4.936718  | -1.227985 |
| H | 2.984633  | 5.924424  | -1.566050 |
| H | 3.301200  | 4.449412  | -2.512804 |
| H | 2.051524  | 4.116920  | 1.644543  |
| H | 2.214871  | 5.727668  | 0.899185  |
| H | 3.663706  | 4.775638  | 1.270968  |
| H | 2.536151  | -0.979684 | -3.370093 |
| H | 1.578457  | -2.419150 | -2.933673 |
| H | 3.194596  | -2.179504 | -2.241782 |
| H | 0.800489  | -1.284387 | 0.608466  |
| H | 2.169767  | -2.341764 | 0.190513  |
| H | 0.581712  | -2.615353 | -0.558366 |
| H | -4.676564 | 0.489661  | 1.754558  |
| H | -5.199153 | 2.712112  | 2.695504  |
| C | -2.013578 | 4.890135  | 0.039947  |
| H | -3.997649 | 4.723719  | 1.900179  |
| C | -2.857364 | -0.164538 | -0.163742 |
| C | -1.205144 | 5.502861  | 1.188265  |
| C | -2.953557 | 5.911867  | -0.608136 |
| H | -1.287376 | 4.578890  | -0.725735 |
| C | -2.471189 | -1.160997 | 0.933074  |
| H | -1.985623 | -0.072018 | -0.830869 |
| C | -4.034371 | -0.675249 | -1.003077 |
| H | -4.939531 | -0.797104 | -0.387337 |
| H | -3.800670 | -1.653904 | -1.449599 |
| H | -4.282010 | 0.021329  | -1.818465 |

|    |           |           |           |
|----|-----------|-----------|-----------|
| H  | -1.613044 | -0.789807 | 1.515119  |
| H  | -2.193885 | -2.132180 | 0.495802  |
| H  | -3.301318 | -1.338679 | 1.634558  |
| H  | -3.676406 | 6.316012  | 0.117699  |
| H  | -3.529905 | 5.462859  | -1.431404 |
| H  | -2.383376 | 6.760994  | -1.014735 |
| H  | -0.519321 | 4.760844  | 1.626633  |
| H  | -1.860852 | 5.872540  | 1.992094  |
| H  | -0.604469 | 6.353955  | 0.832133  |
| Au | 0.110261  | 1.678468  | 1.465982  |
| C  | 0.140106  | 1.352202  | 3.544871  |
| C  | 1.342246  | 1.130118  | 3.891765  |
| C  | -1.172585 | 1.416868  | 4.207191  |
| C  | -1.917457 | 0.247581  | 4.408273  |
| C  | -1.693248 | 2.645755  | 4.632920  |
| C  | -3.157132 | 0.305617  | 5.042166  |
| H  | -1.516952 | -0.710183 | 4.067864  |
| C  | -2.929122 | 2.696831  | 5.277901  |
| H  | -1.124136 | 3.561990  | 4.458266  |
| C  | -3.664899 | 1.527928  | 5.486277  |
| H  | -3.730380 | -0.612715 | 5.193218  |
| H  | -3.323892 | 3.659491  | 5.612392  |
| H  | -4.635183 | 1.571730  | 5.986510  |
| O  | 1.425892  | 0.761513  | 5.884219  |
| C  | 2.776218  | 0.935785  | 3.650979  |
| H  | 2.958618  | 0.970142  | 2.566386  |
| H  | 3.098786  | -0.041004 | 4.034687  |
| H  | 3.374243  | 1.726984  | 4.125460  |
| H  | 0.557458  | 0.803951  | 6.362746  |
| H  | 1.984444  | 1.398282  | 6.346685  |
| O  | -0.776617 | 1.003676  | 7.362445  |
| H  | -1.439762 | 1.597385  | 6.983448  |
| H  | -1.264191 | 0.197222  | 7.564124  |

## Intermediate anti-TS-M

$$E(\omega\text{B97X-D3/def2-TZVPP}) = -1837.021376 E_h$$

$$E(\omega\text{B97X-D3/def2-TZVPP+CPCM(1,4-dioxane)}) = -1837.048261 E_h$$

$$\text{Lowest frequency} = -306.46 \text{ cm}^{-1}$$

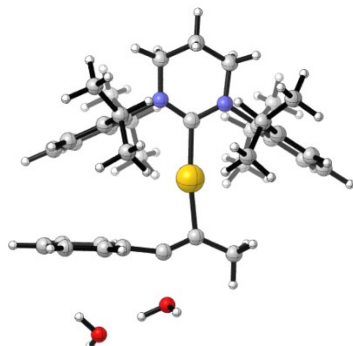

|   |           |           |           |
|---|-----------|-----------|-----------|
| C | -0.939319 | 3.034565  | -3.018269 |
| C | -1.831855 | 2.029422  | -2.315846 |
| H | -1.198848 | 3.092567  | -4.084401 |
| C | 0.511992  | 2.626935  | -2.851941 |
| H | -1.096433 | 4.038164  | -2.589715 |
| H | 0.737921  | 1.715313  | -3.433210 |
| N | 0.806545  | 2.388586  | -1.437472 |
| H | 1.192101  | 3.413403  | -3.208845 |
| C | -0.106943 | 1.993518  | -0.542421 |
| C | 2.183744  | 2.529221  | -1.032232 |
| H | -1.845220 | 1.066292  | -2.856453 |
| H | -2.870737 | 2.386325  | -2.267402 |
| N | -1.369871 | 1.808060  | -0.941842 |
| C | -2.356122 | 1.325951  | -0.007388 |
| C | 3.018853  | 1.396488  | -1.058670 |
| C | 2.650049  | 3.797805  | -0.637965 |
| C | 4.354455  | 1.564347  | -0.680137 |
| C | 3.992591  | 3.911089  | -0.265526 |
| C | 4.839094  | 2.807504  | -0.288862 |
| C | -3.132144 | 2.260491  | 0.703983  |
| C | -2.540496 | -0.062535 | 0.134307  |
| C | -3.543325 | -0.501352 | 1.003596  |
| C | -4.112630 | 1.769546  | 1.570012  |
| C | -4.325553 | 0.403293  | 1.711422  |

|   |           |           |           |
|---|-----------|-----------|-----------|
| C | 2.519287  | 0.020440  | -1.478067 |
| C | 1.737066  | 5.014071  | -0.562807 |
| H | 4.385399  | 4.881688  | 0.048529  |
| H | 5.887537  | 2.917859  | -0.001578 |
| H | 5.029843  | 0.704842  | -0.693369 |
| H | 1.427041  | 0.082829  | -1.603463 |
| C | 2.778046  | -1.029806 | -0.392627 |
| C | 3.116786  | -0.397316 | -2.827895 |
| C | 2.278110  | 6.198675  | -1.370541 |
| H | 0.766972  | 4.732272  | -1.001206 |
| C | 1.469873  | 5.401976  | 0.896877  |
| H | 3.222283  | 6.581590  | -0.952799 |
| H | 1.556923  | 7.030362  | -1.362171 |
| H | 2.467757  | 5.922687  | -2.419162 |
| H | 1.049350  | 4.553298  | 1.459781  |
| H | 0.756733  | 6.238874  | 0.955367  |
| H | 2.397020  | 5.713542  | 1.403641  |
| H | 2.909467  | 0.349820  | -3.609518 |
| H | 2.700140  | -1.361552 | -3.158098 |
| H | 4.210578  | -0.509858 | -2.764511 |
| H | 2.341425  | -0.719497 | 0.569712  |
| H | 3.854391  | -1.200950 | -0.236509 |
| H | 2.329075  | -1.995027 | -0.672268 |
| H | -3.714428 | -1.574249 | 1.126592  |
| H | -5.109298 | 0.040682  | 2.380953  |
| C | -2.934512 | 3.764055  | 0.571444  |
| H | -4.728655 | 2.471538  | 2.138377  |
| C | -1.684289 | -1.087333 | -0.596818 |
| C | -2.437605 | 4.370683  | 1.889258  |
| C | -4.207450 | 4.461637  | 0.075967  |
| H | -2.148298 | 3.936293  | -0.180026 |
| C | -0.831597 | -1.893013 | 0.391346  |
| H | -0.986562 | -0.538668 | -1.248419 |
| C | -2.529274 | -2.001997 | -1.492156 |
| H | -3.202616 | -2.640668 | -0.898868 |

|    |           |           |           |
|----|-----------|-----------|-----------|
| H  | -1.885183 | -2.668546 | -2.086163 |
| H  | -3.153177 | -1.422022 | -2.189268 |
| H  | -0.206395 | -1.228990 | 1.009419  |
| H  | -0.166736 | -2.587807 | -0.144430 |
| H  | -1.459623 | -2.493616 | 1.068842  |
| H  | -5.023212 | 4.388893  | 0.812681  |
| H  | -4.571594 | 4.019526  | -0.864336 |
| H  | -4.020089 | 5.531557  | -0.102033 |
| H  | -1.497170 | 3.895967  | 2.211941  |
| H  | -3.177254 | 4.234708  | 2.694771  |
| H  | -2.256397 | 5.450923  | 1.779572  |
| Au | 0.489471  | 1.726351  | 1.416479  |
| C  | 0.367572  | 1.397286  | 4.191168  |
| C  | 1.311387  | 1.555957  | 3.331354  |
| C  | -1.048358 | 1.181632  | 4.470728  |
| C  | -1.593227 | -0.105450 | 4.364340  |
| C  | -1.846722 | 2.238570  | 4.931264  |
| C  | -2.915236 | -0.335181 | 4.737357  |
| H  | -0.967769 | -0.920789 | 3.993879  |
| C  | -3.168079 | 2.005331  | 5.303687  |
| H  | -1.419867 | 3.241785  | 5.005675  |
| C  | -3.699526 | 0.715820  | 5.216482  |
| H  | -3.337333 | -1.339421 | 4.652712  |
| H  | -3.786524 | 2.830833  | 5.663690  |
| H  | -4.735592 | 0.533786  | 5.512946  |
| C  | 2.794657  | 1.670612  | 3.494632  |
| H  | 3.303467  | 0.943302  | 2.845699  |
| H  | 3.111280  | 1.503362  | 4.533656  |
| H  | 3.131734  | 2.664678  | 3.163154  |
| H  | 0.359776  | 0.945642  | 6.570774  |
| H  | 1.274472  | 2.181600  | 6.257568  |
| O  | 1.055883  | 1.293623  | 5.945993  |
| O  | -0.851962 | 0.477147  | 7.578577  |
| H  | -0.864455 | -0.425532 | 7.915921  |
| H  | -1.739387 | 0.635699  | 7.229797  |

## Intermediate syn-IV-aM

$$E(\omega\text{B97X-D3/def2-TZVPP}) = -1760.565958 E_h$$

$$E(\omega\text{B97X-D3/def2-TZVPP+CPCM(1,4-dioxane)}) = -1760.592076 E_h$$

Lowest frequency = 13.88  $\text{cm}^{-1}$

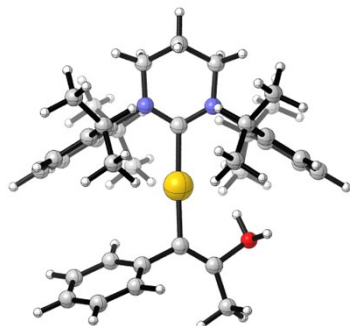

|   |           |           |           |
|---|-----------|-----------|-----------|
| C | -0.754790 | 2.978141  | -3.074281 |
| C | -1.736962 | 1.973306  | -2.498048 |
| H | -0.886306 | 3.052969  | -4.162582 |
| C | 0.667900  | 2.559821  | -2.746056 |
| H | -0.954021 | 3.977523  | -2.653355 |
| H | 0.955485  | 1.654786  | -3.310127 |
| N | 0.789883  | 2.302569  | -1.308968 |
| H | 1.386924  | 3.348049  | -3.011059 |
| C | -0.232030 | 1.899424  | -0.541418 |
| C | 2.087579  | 2.468554  | -0.707191 |
| H | -1.704244 | 1.020509  | -3.055109 |
| H | -2.768803 | 2.348058  | -2.558184 |
| N | -1.434563 | 1.720903  | -1.086730 |
| C | -2.507070 | 1.251079  | -0.239943 |
| C | 2.955127  | 1.358932  | -0.638161 |
| C | 2.442960  | 3.729292  | -0.187923 |
| C | 4.211957  | 1.546743  | -0.051589 |
| C | 3.710601  | 3.864239  | 0.393368  |
| C | 4.592965  | 2.787626  | 0.452065  |
| C | -3.294907 | 2.194241  | 0.447992  |
| C | -2.712635 | -0.135606 | -0.112943 |
| C | -3.744153 | -0.565811 | 0.727176  |
| C | -4.309489 | 1.710491  | 1.278335  |
| C | -4.535628 | 0.345898  | 1.416566  |



|   |           |           |           |
|---|-----------|-----------|-----------|
| C | 2.560836  | -0.019993 | -1.149633 |
| C | 1.497376  | 4.921812  | -0.210500 |
| H | 4.021709  | 4.837503  | 0.783926  |
| H | 5.587578  | 2.916933  | 0.886427  |
| H | 4.908711  | 0.706890  | 0.009650  |
| H | 1.500499  | 0.022857  | -1.442792 |
| C | 2.674985  | -1.078289 | -0.046443 |
| C | 3.371410  | -0.404454 | -2.393873 |
| C | 2.048235  | 6.063322  | -1.073411 |
| H | 0.551409  | 4.588118  | -0.663445 |
| C | 1.167553  | 5.392943  | 1.211582  |
| H | 2.995684  | 6.456550  | -0.672410 |
| H | 1.332431  | 6.898482  | -1.108609 |
| H | 2.238347  | 5.736320  | -2.107022 |
| H | 0.735848  | 4.575420  | 1.811482  |
| H | 0.432835  | 6.211873  | 1.188498  |
| H | 2.061958  | 5.769877  | 1.733588  |
| H | 3.261650  | 0.344156  | -3.193565 |
| H | 3.036705  | -1.375867 | -2.787936 |
| H | 4.445596  | -0.490813 | -2.166693 |
| H | 2.083093  | -0.798146 | 0.839441  |
| H | 3.717554  | -1.228288 | 0.274627  |
| H | 2.299518  | -2.049198 | -0.401957 |
| H | -3.927839 | -1.636694 | 0.847442  |
| H | -5.335493 | -0.009592 | 2.070551  |
| C | -3.067776 | 3.696285  | 0.343638  |
| H | -4.931868 | 2.416459  | 1.834049  |
| C | -1.837191 | -1.163852 | -0.815998 |
| C | -2.688180 | 4.290821  | 1.705897  |
| C | -4.283358 | 4.409121  | -0.262282 |
| H | -2.216383 | 3.864777  | -0.334905 |
| C | -1.005739 | -1.958612 | 0.198200  |
| H | -1.125939 | -0.618668 | -1.456537 |
| C | -2.658399 | -2.087615 | -1.723661 |
| H | -3.346664 | -2.720461 | -1.141879 |

|    |           |           |           |
|----|-----------|-----------|-----------|
| H  | -1.998892 | -2.760041 | -2.293636 |
| H  | -3.263181 | -1.514502 | -2.442707 |
| H  | -0.395027 | -1.289231 | 0.824998  |
| H  | -0.329177 | -2.658876 | -0.315494 |
| H  | -1.646881 | -2.551211 | 0.869583  |
| H  | -5.165290 | 4.328746  | 0.392266  |
| H  | -4.557397 | 3.983396  | -1.239909 |
| H  | -4.074551 | 5.480443  | -0.404330 |
| H  | -1.787682 | 3.807549  | 2.118053  |
| H  | -3.494332 | 4.157243  | 2.443780  |
| H  | -2.489955 | 5.370278  | 1.619536  |
| Au | 0.046949  | 1.674299  | 1.498821  |
| C  | 0.368922  | 1.651796  | 3.537518  |
| C  | 1.583858  | 1.795832  | 4.053868  |
| C  | -0.842311 | 1.584974  | 4.395339  |
| C  | -1.763976 | 0.542982  | 4.204570  |
| C  | -1.133597 | 2.576984  | 5.343173  |
| C  | -2.924402 | 0.473986  | 4.969467  |
| H  | -1.565001 | -0.217684 | 3.443828  |
| C  | -2.306474 | 2.515360  | 6.095840  |
| H  | -0.448841 | 3.419951  | 5.473959  |
| C  | -3.200186 | 1.460701  | 5.916930  |
| H  | -3.624679 | -0.350860 | 4.816206  |
| H  | -2.524977 | 3.299621  | 6.824987  |
| H  | -4.117045 | 1.412250  | 6.509206  |
| C  | 2.199438  | 1.840357  | 5.404491  |
| H  | 2.688584  | 2.805798  | 5.613612  |
| H  | 1.406942  | 1.695966  | 6.150339  |
| H  | 2.945615  | 1.040680  | 5.526809  |
| H  | 3.097728  | 2.681423  | 2.873462  |
| H  | 2.191538  | 1.613721  | 2.142348  |
| O  | 2.677570  | 1.807604  | 2.997695  |

### Intermediate syn-IV-M

$$E(\omega\text{B97X-D3/def2-TZVPP}) = -1760.561284 E_h$$

$E(\omega\text{B97X-D3/def2-TZVPP+CPCM}(1,4\text{-dioxane})) = -1760.585541 E_h$

Lowest frequency = 11.82  $\text{cm}^{-1}$

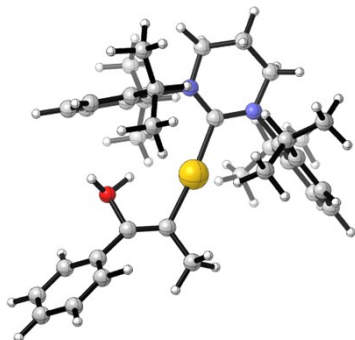

|   |           |           |           |
|---|-----------|-----------|-----------|
| C | -1.071340 | 2.917422  | -3.294716 |
| C | -2.029628 | 1.848622  | -2.799672 |
| H | -1.117578 | 2.990338  | -4.390059 |
| C | 0.342748  | 2.583088  | -2.853502 |
| H | -1.370016 | 3.899037  | -2.891291 |
| H | 0.747901  | 1.728346  | -3.423463 |
| N | 0.370821  | 2.265895  | -1.421966 |
| H | 1.023583  | 3.429854  | -3.020234 |
| C | -0.684952 | 1.846194  | -0.724635 |
| C | 1.632022  | 2.431535  | -0.738343 |
| H | -1.861221 | 0.892041  | -3.325898 |
| H | -3.075857 | 2.134902  | -2.977176 |
| N | -1.852776 | 1.651625  | -1.357991 |
| C | -3.003445 | 1.226670  | -0.602926 |
| C | 2.515821  | 1.338249  | -0.677375 |
| C | 1.932565  | 3.677625  | -0.155962 |
| C | 3.724151  | 1.516794  | 0.002419  |
| C | 3.157205  | 3.805141  | 0.505717  |
| C | 4.044641  | 2.737548  | 0.585663  |
| C | -3.826698 | 2.201281  | -0.003308 |
| C | -3.273817 | -0.152848 | -0.488536 |
| C | -4.399233 | -0.542474 | 0.247614  |
| C | -4.938015 | 1.760335  | 0.727946  |
| C | -5.228842 | 0.402266  | 0.847614  |
| C | 2.172353  | -0.021785 | -1.268440 |
| C | 0.973432  | 4.859727  | -0.199321 |

|   |           |           |           |
|---|-----------|-----------|-----------|
| H | 3.420933  | 4.757842  | 0.972430  |
| H | 4.994762  | 2.856758  | 1.111412  |
| H | 4.426644  | 0.683168  | 0.082257  |
| H | 1.259788  | 0.095080  | -1.874605 |
| C | 1.848429  | -1.026104 | -0.155468 |
| C | 3.272627  | -0.545741 | -2.196022 |
| C | 1.573627  | 6.050462  | -0.955720 |
| H | 0.070959  | 4.542782  | -0.746073 |
| C | 0.522956  | 5.257277  | 1.211798  |
| H | 2.478628  | 6.432597  | -0.458233 |
| H | 0.851041  | 6.879237  | -1.009061 |
| H | 1.854600  | 5.777092  | -1.984349 |
| H | 0.064869  | 4.403035  | 1.735927  |
| H | -0.219405 | 6.069277  | 1.171164  |
| H | 1.368745  | 5.608891  | 1.823127  |
| H | 3.513611  | 0.179194  | -2.988356 |
| H | 2.957640  | -1.485132 | -2.675085 |
| H | 4.201599  | -0.759984 | -1.645151 |
| H | 1.042899  | -0.651405 | 0.496074  |
| H | 2.727771  | -1.213000 | 0.480533  |
| H | 1.527905  | -1.991590 | -0.576768 |
| H | -4.635665 | -1.604763 | 0.349595  |
| H | -6.114145 | 0.078545  | 1.401754  |
| C | -3.551007 | 3.693138  | -0.117855 |
| H | -5.601932 | 2.495992  | 1.190425  |
| C | -2.390769 | -1.210237 | -1.135452 |
| C | -3.351715 | 4.337898  | 1.258461  |
| C | -4.649378 | 4.402081  | -0.920042 |
| H | -2.606891 | 3.814747  | -0.668799 |
| C | -1.846530 | -2.207292 | -0.107708 |
| H | -1.520443 | -0.696163 | -1.570761 |
| C | -3.137789 | -1.920499 | -2.272058 |
| H | -3.988636 | -2.504729 | -1.887449 |
| H | -2.470631 | -2.616767 | -2.802523 |
| H | -3.537078 | -1.203211 | -3.005325 |

|    |           |           |           |
|----|-----------|-----------|-----------|
| H  | -1.286654 | -1.696550 | 0.691475  |
| H  | -1.161858 | -2.920527 | -0.590439 |
| H  | -2.651003 | -2.794662 | 0.361702  |
| H  | -5.620049 | 4.360398  | -0.401329 |
| H  | -4.786150 | 3.948996  | -1.913816 |
| H  | -4.396076 | 5.463354  | -1.062770 |
| H  | -2.549345 | 3.835408  | 1.821887  |
| H  | -4.270429 | 4.302418  | 1.865167  |
| H  | -3.075004 | 5.397233  | 1.149383  |
| Au | -0.598842 | 1.600981  | 1.340114  |
| C  | -1.888674 | 1.049400  | 3.947946  |
| C  | -0.762046 | 1.503265  | 3.401361  |
| C  | -2.487185 | 1.010281  | 5.292052  |
| C  | -3.111951 | -0.146425 | 5.784336  |
| C  | -2.434580 | 2.156445  | 6.099337  |
| C  | -3.660054 | -0.155776 | 7.063877  |
| H  | -3.157350 | -1.046386 | 5.165408  |
| C  | -2.971112 | 2.137018  | 7.384206  |
| H  | -1.979981 | 3.070529  | 5.710324  |
| C  | -3.583518 | 0.981922  | 7.868315  |
| H  | -4.141976 | -1.060621 | 7.441155  |
| H  | -2.920071 | 3.033586  | 8.006411  |
| H  | -4.009380 | 0.969099  | 8.874192  |
| C  | 0.337500  | 2.064277  | 4.265290  |
| H  | 0.419306  | 3.152949  | 4.113349  |
| H  | 0.196684  | 1.874912  | 5.340355  |
| H  | 1.305573  | 1.638702  | 3.961837  |
| H  | -3.673037 | 0.851489  | 2.835394  |
| H  | -2.335907 | 0.423529  | 2.087665  |
| O  | -2.820918 | 0.382982  | 2.961750  |

### Intermediate anti-IV-aM

$$E(\omega\text{B97X-D3/def2-TZVPP}) = -1837.031603 E_h$$

$$E(\omega\text{B97X-D3/def2-TZVPP+CPCM(1,4-dioxane)}) = -1837.061006 E_h$$

$$\text{Lowest frequency} = 6.80 \text{ cm}^{-1}$$

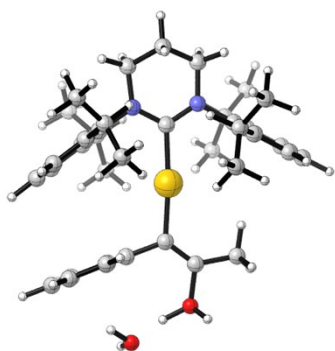

|   |           |           |           |
|---|-----------|-----------|-----------|
| C | -0.521573 | 2.992766  | -3.126668 |
| C | -1.733398 | 2.433745  | -2.401812 |
| H | -0.712734 | 3.040972  | -4.207649 |
| C | 0.689503  | 2.120073  | -2.851221 |
| H | -0.327676 | 4.022124  | -2.783573 |
| H | 0.607837  | 1.155327  | -3.382586 |
| N | 0.827550  | 1.874614  | -1.413437 |
| H | 1.614674  | 2.600599  | -3.200590 |
| C | -0.183639 | 1.940818  | -0.539971 |
| C | 2.141273  | 1.530818  | -0.930580 |
| H | -2.062998 | 1.481839  | -2.855452 |
| H | -2.584925 | 3.126826  | -2.454055 |
| N | -1.414422 | 2.216936  | -0.989806 |
| C | -2.485058 | 2.330561  | -0.029773 |
| C | 2.537487  | 0.182147  | -0.963581 |
| C | 2.981549  | 2.548545  | -0.439097 |
| C | 3.813851  | -0.136294 | -0.489508 |
| C | 4.249614  | 2.178856  | 0.018643  |
| C | 4.665123  | 0.851167  | -0.006347 |
| C | -2.775310 | 3.600926  | 0.501951  |
| C | -3.174671 | 1.173745  | 0.373386  |
| C | -4.162730 | 1.314451  | 1.353281  |
| C | -3.773410 | 3.689802  | 1.475298  |
| C | -4.457853 | 2.556765  | 1.902917  |
| C | 1.618848  | -0.921873 | -1.467175 |
| C | 2.555665  | 4.009170  | -0.383314 |
| H | 4.927878  | 2.945623  | 0.402068  |
| H | 5.662666  | 0.584467  | 0.350957  |

|   |           |           |           |
|---|-----------|-----------|-----------|
| H | 4.148973  | -1.176887 | -0.498126 |
| H | 0.690240  | -0.450567 | -1.823306 |
| C | 1.222604  | -1.871706 | -0.332467 |
| C | 2.239209  | -1.672861 | -2.650842 |
| C | 3.381524  | 4.870367  | -1.346617 |
| H | 1.504237  | 4.064466  | -0.704391 |
| C | 2.613576  | 4.555778  | 1.047217  |
| H | 4.441391  | 4.903882  | -1.048643 |
| H | 3.007783  | 5.905809  | -1.360463 |
| H | 3.342417  | 4.481148  | -2.375466 |
| H | 2.004802  | 3.940857  | 1.729418  |
| H | 2.231534  | 5.587349  | 1.083161  |
| H | 3.645052  | 4.572899  | 1.433150  |
| H | 2.523294  | -0.982903 | -3.460147 |
| H | 1.532063  | -2.410118 | -3.060887 |
| H | 3.146995  | -2.219937 | -2.351760 |
| H | 0.749352  | -1.321560 | 0.496105  |
| H | 2.098984  | -2.401975 | 0.072773  |
| H | 0.511271  | -2.630201 | -0.694130 |
| H | -4.710408 | 0.433146  | 1.697053  |
| H | -5.230851 | 2.643494  | 2.670648  |
| C | -2.019430 | 4.848264  | 0.068728  |
| H | -4.015301 | 4.662102  | 1.913404  |
| C | -2.873242 | -0.199167 | -0.209280 |
| C | -1.224980 | 5.450534  | 1.232044  |
| C | -2.950858 | 5.876091  | -0.581951 |
| H | -1.283308 | 4.543548  | -0.689774 |
| C | -2.490730 | -1.204617 | 0.880545  |
| H | -1.997194 | -0.098135 | -0.869086 |
| C | -4.043503 | -0.702930 | -1.062030 |
| H | -4.952721 | -0.835662 | -0.454423 |
| H | -3.803865 | -1.675092 | -1.519691 |
| H | -4.287755 | 0.003097  | -1.870394 |
| H | -1.634791 | -0.834685 | 1.466585  |
| H | -2.210302 | -2.171948 | 0.436603  |

|    |           |           |           |
|----|-----------|-----------|-----------|
| H  | -3.324126 | -1.389310 | 1.576577  |
| H  | -3.686430 | 6.269755  | 0.137003  |
| H  | -3.512826 | 5.436141  | -1.419975 |
| H  | -2.375981 | 6.731283  | -0.969107 |
| H  | -0.546891 | 4.702556  | 1.672096  |
| H  | -1.890890 | 5.815602  | 2.029840  |
| H  | -0.618621 | 6.303251  | 0.889184  |
| Au | 0.094877  | 1.651177  | 1.491830  |
| C  | 0.203227  | 1.426722  | 3.539475  |
| C  | 1.342003  | 1.289640  | 4.205599  |
| C  | -1.115890 | 1.467221  | 4.218650  |
| C  | -1.867433 | 0.295519  | 4.399145  |
| C  | -1.650786 | 2.683739  | 4.673049  |
| C  | -3.104409 | 0.333753  | 5.042119  |
| H  | -1.473593 | -0.653042 | 4.024123  |
| C  | -2.885190 | 2.719141  | 5.325336  |
| H  | -1.091178 | 3.608345  | 4.506686  |
| C  | -3.615254 | 1.543077  | 5.518846  |
| H  | -3.677130 | -0.588890 | 5.169056  |
| H  | -3.286046 | 3.674888  | 5.673294  |
| H  | -4.584086 | 1.573037  | 6.022653  |
| O  | 1.311212  | 1.121174  | 5.688129  |
| C  | 2.762404  | 1.208176  | 3.759660  |
| H  | 2.800996  | 1.291069  | 2.666009  |
| H  | 3.218593  | 0.249315  | 4.052377  |
| H  | 3.375155  | 2.025138  | 4.179379  |
| H  | 0.406490  | 1.139729  | 6.276674  |
| H  | 2.012977  | 1.624962  | 6.126173  |
| O  | -0.612297 | 1.174377  | 7.209456  |
| H  | -1.314554 | 1.763388  | 6.877822  |
| H  | -1.041802 | 0.313876  | 7.311627  |

### Intermediate anti-IV-M

$$E(\omega\text{B97X-D3/def2-TZVPP}) = -1837.021832 E_h$$

$$E(\omega\text{B97X-D3/def2-TZVPP+CPCM(1,4-dioxane)}) = -1837.052481 E_h$$



Lowest frequency = 10.01 cm<sup>-1</sup>

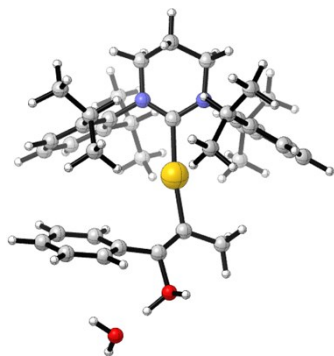

|   |           |           |           |
|---|-----------|-----------|-----------|
| C | -0.962505 | 3.058840  | -2.941697 |
| C | -1.828065 | 1.967326  | -2.343964 |
| H | -1.191295 | 3.182657  | -4.009285 |
| C | 0.498183  | 2.698389  | -2.755773 |
| H | -1.177693 | 4.020304  | -2.446835 |
| H | 0.780268  | 1.845812  | -3.399200 |
| N | 0.760067  | 2.358168  | -1.355850 |
| H | 1.156329  | 3.536305  | -3.026497 |
| C | -0.159182 | 1.860942  | -0.515687 |
| C | 2.123542  | 2.503836  | -0.912576 |
| H | -1.777755 | 1.045853  | -2.951056 |
| H | -2.884308 | 2.270707  | -2.308413 |
| N | -1.401349 | 1.669132  | -0.973262 |
| C | -2.399378 | 1.061824  | -0.132880 |
| C | 2.990736  | 1.399622  | -1.008534 |
| C | 2.545963  | 3.751962  | -0.418287 |
| C | 4.313469  | 1.573929  | -0.590177 |
| C | 3.877824  | 3.874320  | -0.012134 |
| C | 4.755142  | 2.797776  | -0.098664 |
| C | -3.274221 | 1.892940  | 0.591509  |
| C | -2.509342 | -0.340605 | -0.119531 |
| C | -3.547222 | -0.904862 | 0.629586  |
| C | -4.296205 | 1.280466  | 1.320865  |
| C | -4.439568 | -0.103542 | 1.332561  |
| C | 2.532969  | 0.047047  | -1.537611 |
| C | 1.593119  | 4.931284  | -0.277193 |
| H | 4.237765  | 4.829871  | 0.378355  |

|   |           |           |           |
|---|-----------|-----------|-----------|
| H | 5.794858  | 2.914582  | 0.216734  |
| H | 5.013099  | 0.736086  | -0.652576 |
| H | 1.446639  | 0.104746  | -1.705731 |
| C | 2.760163  | -1.068200 | -0.512169 |
| C | 3.188419  | -0.279769 | -2.884979 |
| C | 2.110600  | 6.185943  | -0.988913 |
| H | 0.642218  | 4.650567  | -0.755891 |
| C | 1.280850  | 5.205049  | 1.199232  |
| H | 3.034865  | 6.567388  | -0.527247 |
| H | 1.363280  | 6.992916  | -0.938330 |
| H | 2.327050  | 5.989421  | -2.050181 |
| H | 0.867222  | 4.308585  | 1.688244  |
| H | 0.546097  | 6.019277  | 1.297919  |
| H | 2.188118  | 5.500122  | 1.750297  |
| H | 3.005731  | 0.513719  | -3.626163 |
| H | 2.790039  | -1.222729 | -3.290673 |
| H | 4.279557  | -0.393295 | -2.786184 |
| H | 2.262238  | -0.833370 | 0.441512  |
| H | 3.830927  | -1.225054 | -0.308626 |
| H | 2.351344  | -2.021349 | -0.880774 |
| H | -3.666581 | -1.991571 | 0.653336  |
| H | -5.258409 | -0.563766 | 1.892285  |
| C | -3.122260 | 3.407684  | 0.617391  |
| H | -4.994983 | 1.898525  | 1.890826  |
| C | -1.551674 | -1.241981 | -0.886473 |
| C | -2.657069 | 3.883966  | 1.999205  |
| C | -4.402863 | 4.125781  | 0.176038  |
| H | -2.329902 | 3.674540  | -0.098542 |
| C | -0.806107 | -2.194437 | 0.054034  |
| H | -0.790313 | -0.599693 | -1.354641 |
| C | -2.267938 | -1.999820 | -2.010566 |
| H | -3.010835 | -2.707052 | -1.609228 |
| H | -1.547737 | -2.578294 | -2.610037 |
| H | -2.800087 | -1.313059 | -2.686948 |
| H | -0.259441 | -1.636257 | 0.830561  |

|    |           |           |           |
|----|-----------|-----------|-----------|
| H  | -0.079966 | -2.801648 | -0.507970 |
| H  | -1.495102 | -2.890717 | 0.557496  |
| H  | -5.230058 | 3.956464  | 0.883191  |
| H  | -4.738967 | 3.784341  | -0.815091 |
| H  | -4.237390 | 5.212580  | 0.121446  |
| H  | -1.711853 | 3.398226  | 2.289172  |
| H  | -3.402851 | 3.647396  | 2.774785  |
| H  | -2.498381 | 4.973519  | 2.005252  |
| Au | 0.423280  | 1.471937  | 1.441537  |
| C  | 0.533087  | 1.484458  | 4.420618  |
| C  | 1.248536  | 1.252384  | 3.325683  |
| C  | -0.910690 | 1.695244  | 4.671963  |
| C  | -1.844146 | 0.744774  | 4.241545  |
| C  | -1.365061 | 2.818831  | 5.384136  |
| C  | -3.197460 | 0.900802  | 4.538940  |
| H  | -1.498204 | -0.123640 | 3.675340  |
| C  | -2.717494 | 2.970547  | 5.684366  |
| H  | -0.656054 | 3.591245  | 5.698151  |
| C  | -3.636942 | 2.005031  | 5.266928  |
| H  | -3.910463 | 0.146574  | 4.201235  |
| H  | -3.057837 | 3.853441  | 6.231368  |
| H  | -4.697786 | 2.121600  | 5.501555  |
| C  | 2.731927  | 0.984675  | 3.373111  |
| H  | 2.964168  | 0.072849  | 2.803012  |
| H  | 3.147229  | 0.859972  | 4.385421  |
| H  | 3.275356  | 1.796932  | 2.863124  |
| H  | 0.653221  | 1.348457  | 6.588814  |
| H  | 1.824728  | 2.271890  | 5.865994  |
| O  | 1.266108  | 1.488922  | 5.755502  |
| O  | -0.236349 | 1.207959  | 7.729513  |
| H  | -0.302649 | 0.362188  | 8.190258  |
| H  | -1.136814 | 1.467697  | 7.481191  |

### Intermediate syn-V-aM

$$E(\omega\text{B97X-D3/def2-TZVPP}) = -1760.632608 E_h$$

$E(\omega\text{B97X-D3/def2-TZVPP+CPCM(1,4-dioxane)}) = -1760.657693 E_h$

Lowest frequency = 14.34  $\text{cm}^{-1}$

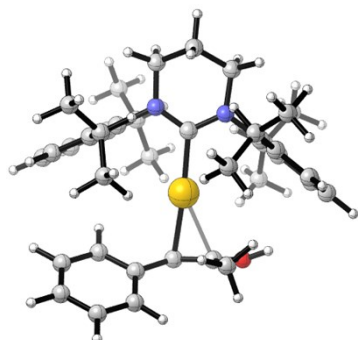

|   |           |           |           |
|---|-----------|-----------|-----------|
| C | -0.731585 | 3.064639  | -2.900151 |
| C | -1.735498 | 2.080246  | -2.329745 |
| H | -0.877729 | 3.163993  | -3.984496 |
| C | 0.680227  | 2.593593  | -2.599612 |
| H | -0.892084 | 4.061631  | -2.458028 |
| H | 0.919264  | 1.674594  | -3.162924 |
| N | 0.820386  | 2.332490  | -1.164201 |
| H | 1.425613  | 3.350726  | -2.880384 |
| C | -0.194630 | 1.905884  | -0.404944 |
| C | 2.122172  | 2.497839  | -0.564047 |
| H | -1.760683 | 1.147691  | -2.920036 |
| H | -2.752509 | 2.498558  | -2.343079 |
| N | -1.406338 | 1.755671  | -0.937872 |
| C | -2.464836 | 1.180650  | -0.141961 |
| C | 2.960468  | 1.376651  | -0.412561 |
| C | 2.496618  | 3.784216  | -0.128308 |
| C | 4.191757  | 1.571557  | 0.225677  |
| C | 3.736507  | 3.925818  | 0.501508  |
| C | 4.575575  | 2.829301  | 0.683028  |
| C | -3.318806 | 2.035333  | 0.580387  |
| C | -2.615295 | -0.219767 | -0.137386 |
| C | -3.669210 | -0.756288 | 0.608962  |
| C | -4.362693 | 1.447250  | 1.300388  |
| C | -4.540762 | 0.067963  | 1.312690  |
| C | 2.586406  | -0.004009 | -0.934611 |
| C | 1.580198  | 4.989454  | -0.292063 |

|   |           |           |           |
|---|-----------|-----------|-----------|
| H | 4.054439  | 4.910312  | 0.854101  |
| H | 5.546187  | 2.960356  | 1.168118  |
| H | 4.870167  | 0.723721  | 0.352108  |
| H | 1.508619  | 0.004672  | -1.161302 |
| C | 2.816528  | -1.108177 | 0.102378  |
| C | 3.332315  | -0.301418 | -2.242580 |
| C | 2.298361  | 6.182845  | -0.928868 |
| H | 0.766174  | 4.697935  | -0.971507 |
| C | 0.924676  | 5.368284  | 1.040961  |
| H | 3.068372  | 6.603723  | -0.263801 |
| H | 1.580998  | 6.988559  | -1.145428 |
| H | 2.790292  | 5.901998  | -1.872498 |
| H | 0.362397  | 4.520979  | 1.464043  |
| H | 0.222034  | 6.204543  | 0.905701  |
| H | 1.678664  | 5.681085  | 1.781185  |
| H | 3.148639  | 0.473930  | -3.002199 |
| H | 3.014674  | -1.269569 | -2.658598 |
| H | 4.420029  | -0.349180 | -2.076448 |
| H | 2.325520  | -0.876148 | 1.059606  |
| H | 3.887148  | -1.265619 | 0.306062  |
| H | 2.415876  | -2.064791 | -0.264085 |
| H | -3.815596 | -1.839340 | 0.635395  |
| H | -5.366730 | -0.371233 | 1.877673  |
| C | -3.123514 | 3.544713  | 0.630335  |
| H | -5.047920 | 2.081432  | 1.868475  |
| C | -1.675204 | -1.149875 | -0.892985 |
| C | -2.735561 | 3.999426  | 2.043806  |
| C | -4.359029 | 4.297774  | 0.121587  |
| H | -2.283278 | 3.798434  | -0.035687 |
| C | -0.879310 | -2.039029 | 0.070006  |
| H | -0.942459 | -0.526346 | -1.429337 |
| C | -2.423223 | -1.979570 | -1.943170 |
| H | -3.131317 | -2.681452 | -1.475878 |
| H | -1.717393 | -2.574512 | -2.542929 |
| H | -2.998335 | -1.339614 | -2.629833 |

|    |           |           |           |
|----|-----------|-----------|-----------|
| H  | -0.294682 | -1.435626 | 0.783632  |
| H  | -0.178301 | -2.681073 | -0.485120 |
| H  | -1.540002 | -2.699059 | 0.653222  |
| H  | -5.229479 | 4.136553  | 0.776340  |
| H  | -4.643136 | 3.976856  | -0.892302 |
| H  | -4.167627 | 5.381067  | 0.093596  |
| H  | -1.824392 | 3.490284  | 2.397072  |
| H  | -3.530069 | 3.774750  | 2.772458  |
| H  | -2.554216 | 5.084792  | 2.067790  |
| Au | 0.145774  | 1.431677  | 1.563833  |
| C  | 0.367005  | 0.761653  | 3.680915  |
| C  | 1.577644  | 1.417988  | 3.487762  |
| C  | -0.820643 | 1.267110  | 4.434593  |
| C  | -2.097947 | 0.830459  | 4.049115  |
| C  | -0.710609 | 2.114919  | 5.544525  |
| C  | -3.232073 | 1.252952  | 4.734612  |
| H  | -2.206567 | 0.158935  | 3.190933  |
| C  | -1.849380 | 2.548210  | 6.222918  |
| H  | 0.271631  | 2.422963  | 5.909047  |
| C  | -3.112894 | 2.123450  | 5.818298  |
| H  | -4.216100 | 0.900278  | 4.416611  |
| H  | -1.743222 | 3.209684  | 7.086110  |
| H  | -4.002616 | 2.457721  | 6.357230  |
| C  | 1.875637  | 2.859702  | 3.777900  |
| H  | 0.964070  | 3.460862  | 3.871463  |
| H  | 2.445474  | 2.925355  | 4.718656  |
| H  | 2.499406  | 3.280459  | 2.973507  |
| H  | 3.327442  | 1.194328  | 2.748266  |
| H  | 0.429400  | -0.328790 | 3.565225  |
| O  | 2.630445  | 0.658258  | 3.153042  |

### Intermediate V-M

$$E(\omega\text{B97X-D3/def2-TZVPP}) = -1760.626405 E_h$$

$$E(\omega\text{B97X-D3/def2-TZVPP+CPCM(1,4-dioxane)}) = -1760.649926 E_h$$

$$E(\omega\text{B97X-D3/def2-TZVPP+CPCM(water)}) = -1760.676292 E_h$$

Lowest frequency = 10.78 cm<sup>-1</sup>

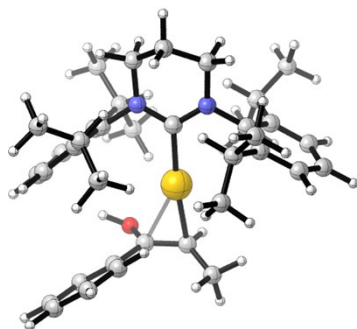

|   |           |           |           |
|---|-----------|-----------|-----------|
| C | -1.301410 | 3.131779  | -2.877910 |
| C | -2.174085 | 1.970753  | -2.432878 |
| H | -1.394277 | 3.283253  | -3.962132 |
| C | 0.146386  | 2.850288  | -2.518343 |
| H | -1.639450 | 4.060386  | -2.389408 |
| H | 0.580414  | 2.085454  | -3.185622 |
| N | 0.258844  | 2.390109  | -1.129340 |
| H | 0.766782  | 3.752274  | -2.620052 |
| C | -0.749160 | 1.870319  | -0.428883 |
| C | 1.564816  | 2.482853  | -0.523178 |
| H | -1.955894 | 1.064903  | -3.025552 |
| H | -3.242600 | 2.193159  | -2.561468 |
| N | -1.938742 | 1.689048  | -1.014865 |
| C | -3.019195 | 1.159245  | -0.219306 |
| C | 2.445395  | 1.392322  | -0.649590 |
| C | 1.914654  | 3.661334  | 0.161940  |
| C | 3.707278  | 1.506230  | -0.058533 |
| C | 3.190370  | 3.725828  | 0.729740  |
| C | 4.078693  | 2.660752  | 0.621873  |
| C | -3.870603 | 2.069735  | 0.435095  |
| C | -3.157713 | -0.234907 | -0.085466 |
| C | -4.142001 | -0.703649 | 0.794320  |
| C | -4.814731 | 1.553479  | 1.326769  |
| C | -4.942586 | 0.180576  | 1.515064  |
| C | 2.062732  | 0.107224  | -1.371494 |
| C | 0.954879  | 4.832291  | 0.321874  |
| H | 3.495372  | 4.626320  | 1.269466  |

|   |           |           |           |
|---|-----------|-----------|-----------|
| H | 5.071376  | 2.731373  | 1.072482  |
| H | 4.414401  | 0.676014  | -0.134193 |
| H | 1.072207  | 0.257768  | -1.830206 |
| C | 1.925861  | -1.057696 | -0.384482 |
| C | 3.044252  | -0.225495 | -2.499996 |
| C | 1.476682  | 6.093640  | -0.376951 |
| H | 0.002015  | 4.558332  | -0.158752 |
| C | 0.647083  | 5.090262  | 1.801550  |
| H | 2.416546  | 6.447598  | 0.074927  |
| H | 0.744047  | 6.911754  | -0.300688 |
| H | 1.672647  | 5.912301  | -1.444783 |
| H | 0.274405  | 4.175375  | 2.290456  |
| H | -0.117518 | 5.874551  | 1.911234  |
| H | 1.541893  | 5.417583  | 2.353447  |
| H | 3.138101  | 0.608132  | -3.212513 |
| H | 2.707813  | -1.113875 | -3.055591 |
| H | 4.050499  | -0.446158 | -2.111155 |
| H | 1.181066  | -0.832560 | 0.395403  |
| H | 2.881892  | -1.272932 | 0.118166  |
| H | 1.606582  | -1.974294 | -0.903713 |
| H | -4.292908 | -1.781066 | 0.906319  |
| H | -5.693880 | -0.203981 | 2.209678  |
| C | -3.790678 | 3.570049  | 0.182932  |
| H | -5.466769 | 2.234300  | 1.879339  |
| C | -2.317644 | -1.213073 | -0.895015 |
| C | -3.184041 | 4.321480  | 1.370610  |
| C | -5.157035 | 4.140127  | -0.215335 |
| H | -3.113178 | 3.727282  | -0.669340 |
| C | -1.773097 | -2.374836 | -0.060469 |
| H | -1.446495 | -0.660733 | -1.283275 |
| C | -3.123737 | -1.724626 | -2.098263 |
| H | -3.987507 | -2.322161 | -1.767021 |
| H | -2.500845 | -2.363978 | -2.742403 |
| H | -3.515583 | -0.897618 | -2.710112 |
| H | -1.210492 | -2.018849 | 0.814752  |



|    |           |           |           |
|----|-----------|-----------|-----------|
| H  | -1.103663 | -2.999781 | -0.670380 |
| H  | -2.578077 | -3.032552 | 0.303194  |
| H  | -5.882467 | 4.082610  | 0.611220  |
| H  | -5.584131 | 3.597092  | -1.072397 |
| H  | -5.065566 | 5.200463  | -0.495407 |
| H  | -2.174644 | 3.947263  | 1.599632  |
| H  | -3.801709 | 4.203729  | 2.274214  |
| H  | -3.104356 | 5.397461  | 1.152493  |
| Au | -0.476335 | 1.232146  | 1.516199  |
| C  | -1.309359 | 0.152472  | 3.542266  |
| C  | 0.066112  | 0.361372  | 3.495453  |
| C  | -2.320989 | 0.999144  | 4.238200  |
| C  | -3.347502 | 0.349193  | 4.940704  |
| C  | -2.283111 | 2.399118  | 4.234579  |
| C  | -4.311621 | 1.085279  | 5.624601  |
| H  | -3.380303 | -0.742689 | 4.974625  |
| C  | -3.242810 | 3.131797  | 4.925562  |
| H  | -1.514752 | 2.924027  | 3.663554  |
| C  | -4.260794 | 2.477942  | 5.620095  |
| H  | -5.101397 | 0.565593  | 6.171836  |
| H  | -3.199572 | 4.223452  | 4.915383  |
| H  | -5.015256 | 3.055660  | 6.159326  |
| C  | 0.861854  | 1.292879  | 4.377948  |
| H  | 1.745232  | 1.674426  | 3.846892  |
| H  | 0.281688  | 2.149728  | 4.739480  |
| H  | 1.221713  | 0.737986  | 5.259001  |
| H  | -2.677550 | -0.938010 | 2.784761  |
| H  | 0.610761  | -0.523219 | 3.137666  |
| O  | -1.757908 | -1.025365 | 3.081928  |

## References

1. B. Zhao and X. Lu, *Tetrahedron Lett.*, 2006, **47**, 6765-6768.
2. G. M. Anstead, C. S. Peterson, K. G. Pinney, S. R. Wilson and J. A. Katzenellenbogen, *J. Med. Chem.*, 1990, **33**, 2726-2734.
3. K. Huang, G. Li, W.-P. Huang, D.-G. Yu and Z.-J. Shi, *Chem. Commun.*, 2011, **47**, 7224-7226.
4. P. J. Wagner, M. A. Meador, B. Zhou and B. S. Park, *J. Am. Chem. Soc.*, 1991, **113**, 9630-9639.
5. B. Zhao and X. Lu, *Org. Lett.*, 2006, **8**, 5987-5990.
6. S. Inaba and R. D. Rieke, *J. Org. Chem.*, 1985, **50**, 1373-1381.
7. D. B. Denney, D. Z. Denney and S. D. Pastor, *Phosphorus Sulfur Relat. Elem.*, 1985, **22**, 191-197.
8. A. R. Hajipour, A. Zarei, L. Khazdooz and A. E. Ruoho, *Synth. Commun.*, 2009, **39**, 2702-2722.
9. M. J. Gallagher, M. J. Gallagher, H. Noerdin and H. Noerdin, *Aust. J. Chem.*, 1985, **38**, 997-1005.
10. L. Ackermann and L. T. Kaspar, *J. Org. Chem.*, 2007, **72**, 6149-6153.
11. L.-Z. Yuan, G. Zhao, A. Hamze, M. Alami and O. Provot, *Adv. Synth. Catal.*, 2017, **359**, 2682-2691.
12. S. H. Lee, A. Kundu, S. H. Han, N. K. Mishra, K. S. Kim, M. H. Choi, A. K. Pandey, J. S. Park, H. S. Kim and I. S. Kim, *ACS Omega*, 2018, **3**, 2661-2672.
13. T. Hering, D. P. Hari and B. König, *J. Org. Chem.*, 2012, **77**, 10347-10352.
14. T. C. Stephens and G. Pattison, *Org. Lett.*, 2017, **19**, 3498-3501.
15. Y. Yuan, X. Shi and W. Liu, *Synlett*, 2011, **2011**, 559-564.
16. a) F. Neese, *Wiley Interdiscip. Rev.: Comput. Mol. Sci.*, 2012, **2**, 73-78; b) F. Neese, *Wiley Interdiscip. Rev.: Comput. Mol. Sci.*, 2018, **8**, e1327.
17. Y.-S. Lin, G.-D. Li, S.-P. Mao and J.-D. Chai, *J. Chem. Theory Comput.*, 2013, **9**, 263-272.
18. F. Weigend and R. Ahlrichs, *Phys. Chem. Chem. Phys.*, 2005, **7**, 3297-3305.
19. V. Barone and M. Cossi, *J. Phys. Chem. A*, 1998, **102**, 1995-2001.
20. F. Weigend, *Phys. Chem. Chem. Phys.*, 2006, **8**, 1057-1065.
21. C. Y. Legault, CYLview, 1.0b, Université de Sherbrooke, 2009, <http://www.cylview.org>.

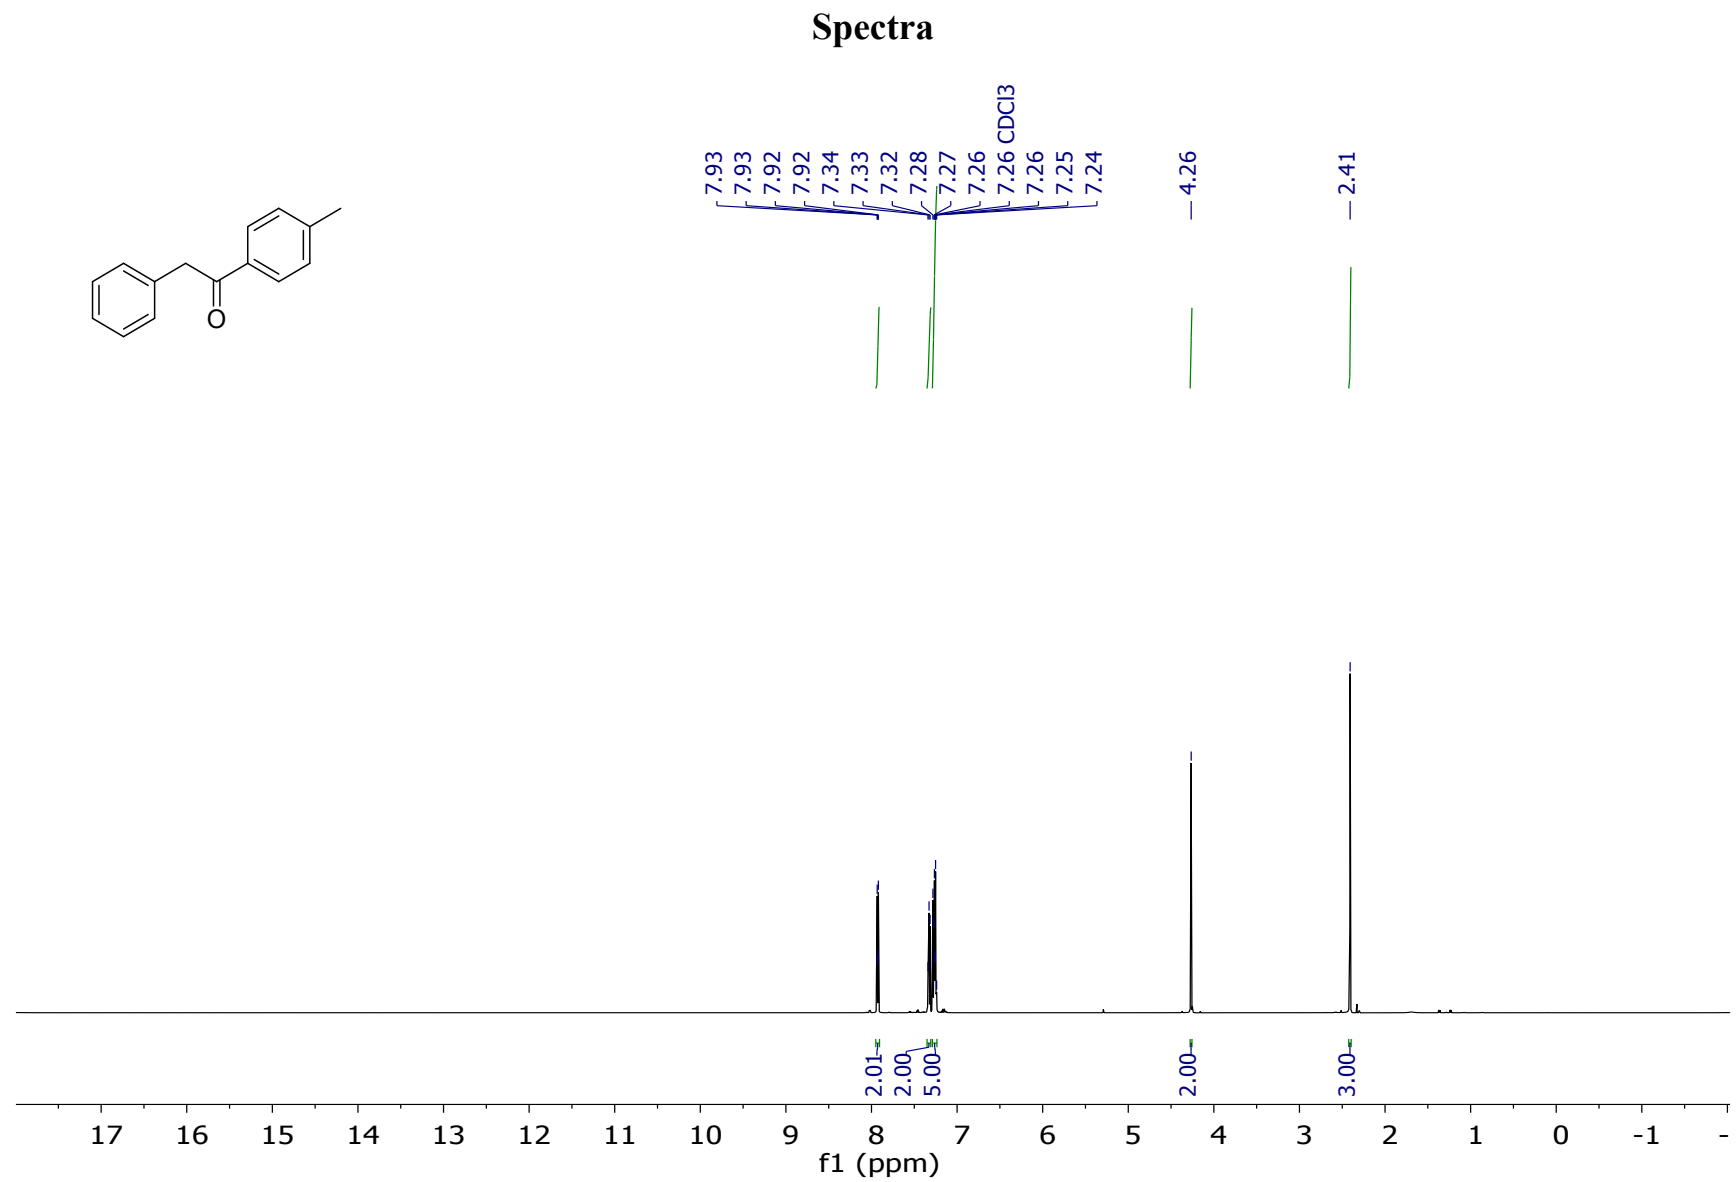

**Figure S1.** <sup>1</sup>H NMR (600 MHz, Chloroform-*d*) of 2-phenyl-1-p-tolyethanone (1a).

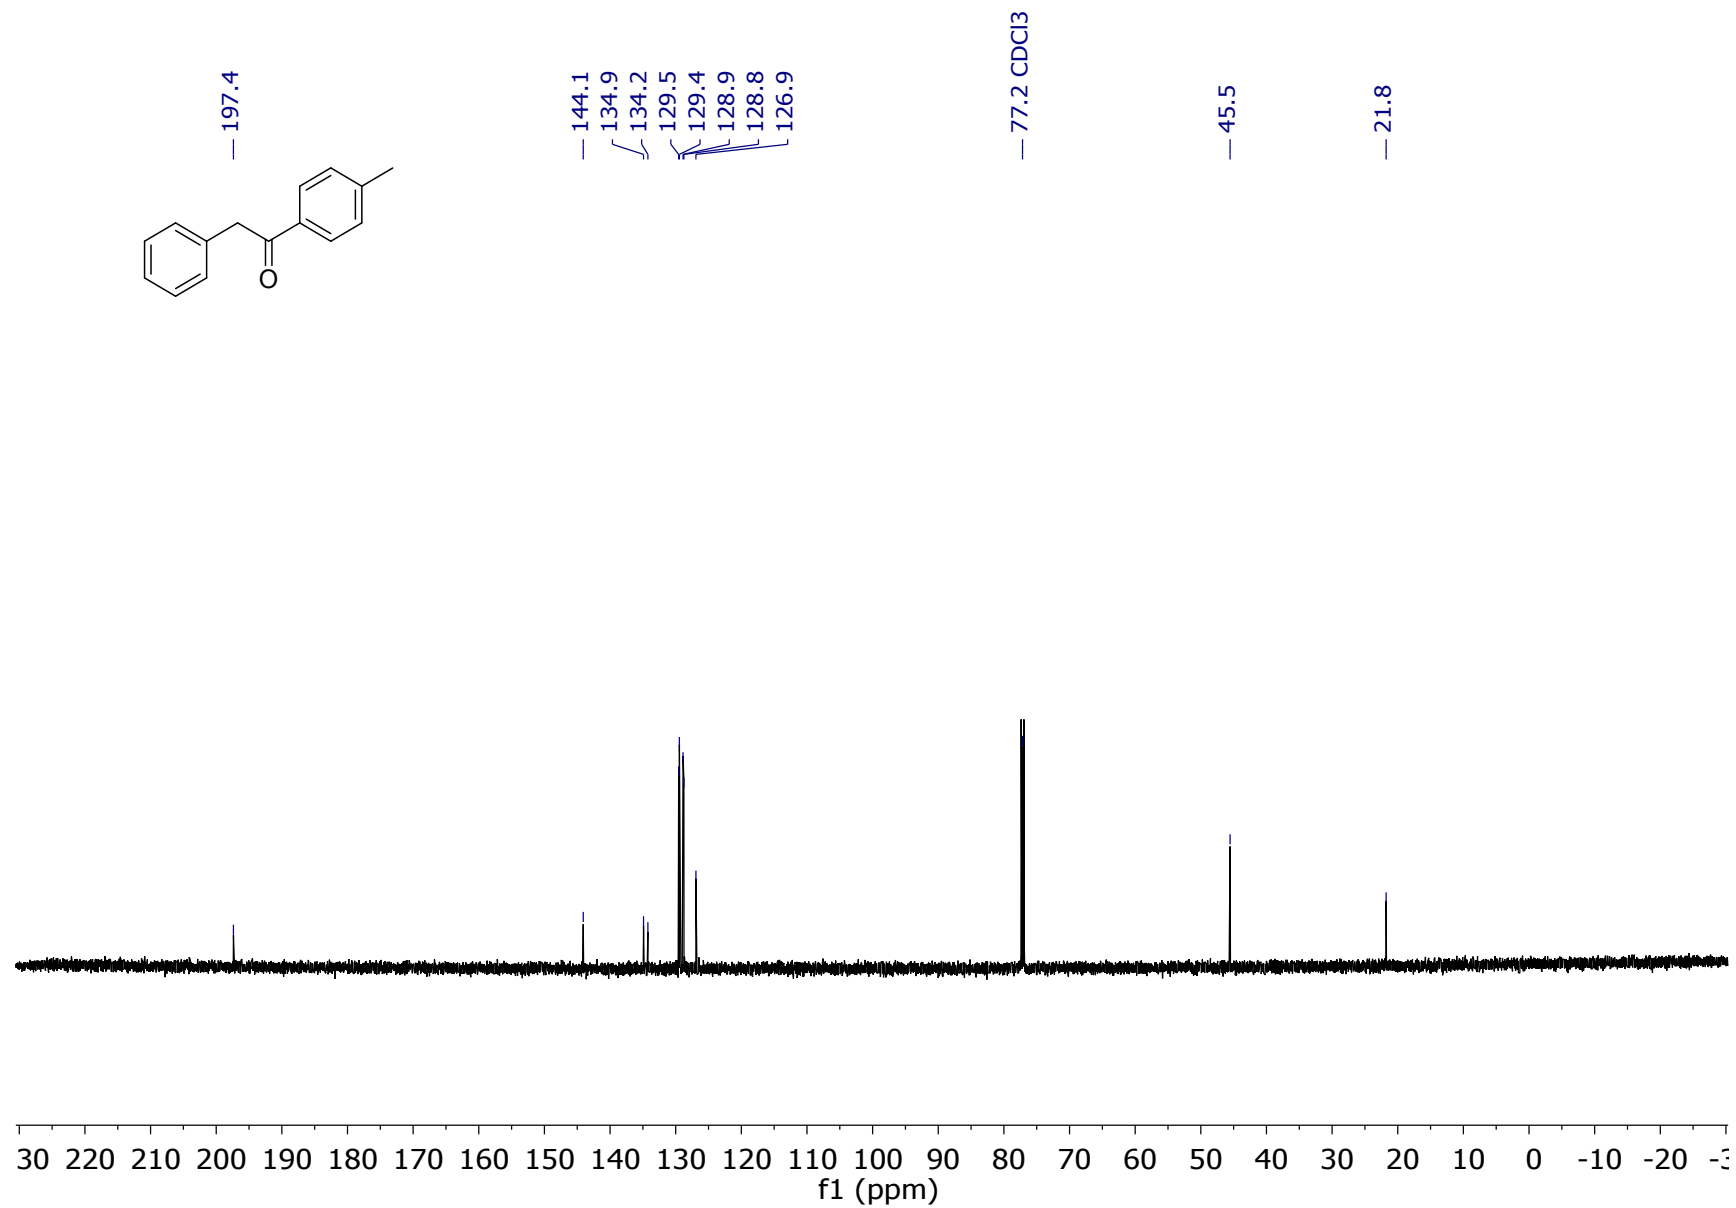

Figure S2.  $^{13}\text{C}\{^1\text{H}\}$  NMR (151 MHz, Chloroform-*d*) of 2-phenyl-1-p-tolyethanone (1a).

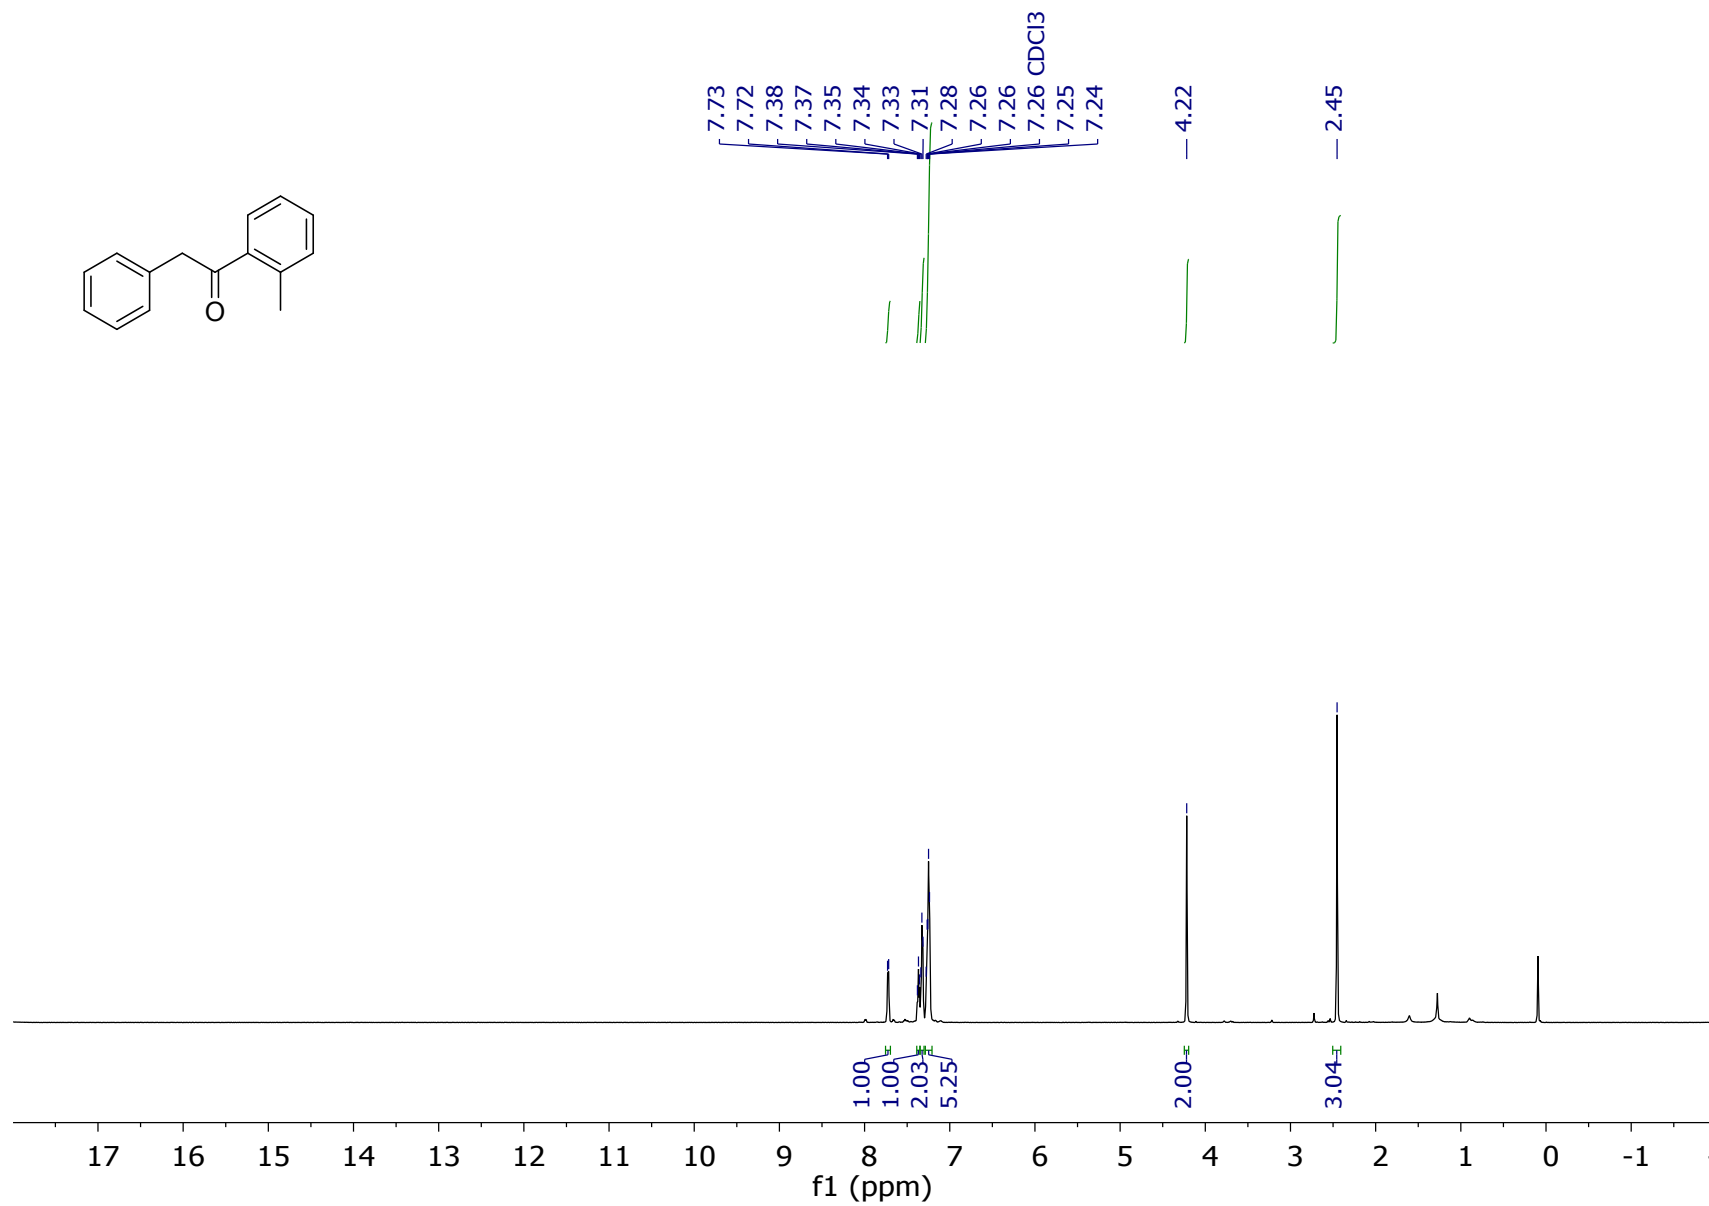

Figure S3. <sup>1</sup>H NMR (600 MHz, Chloroform-*d*) of 2-phenyl-1-o-tolyethanone (2a).

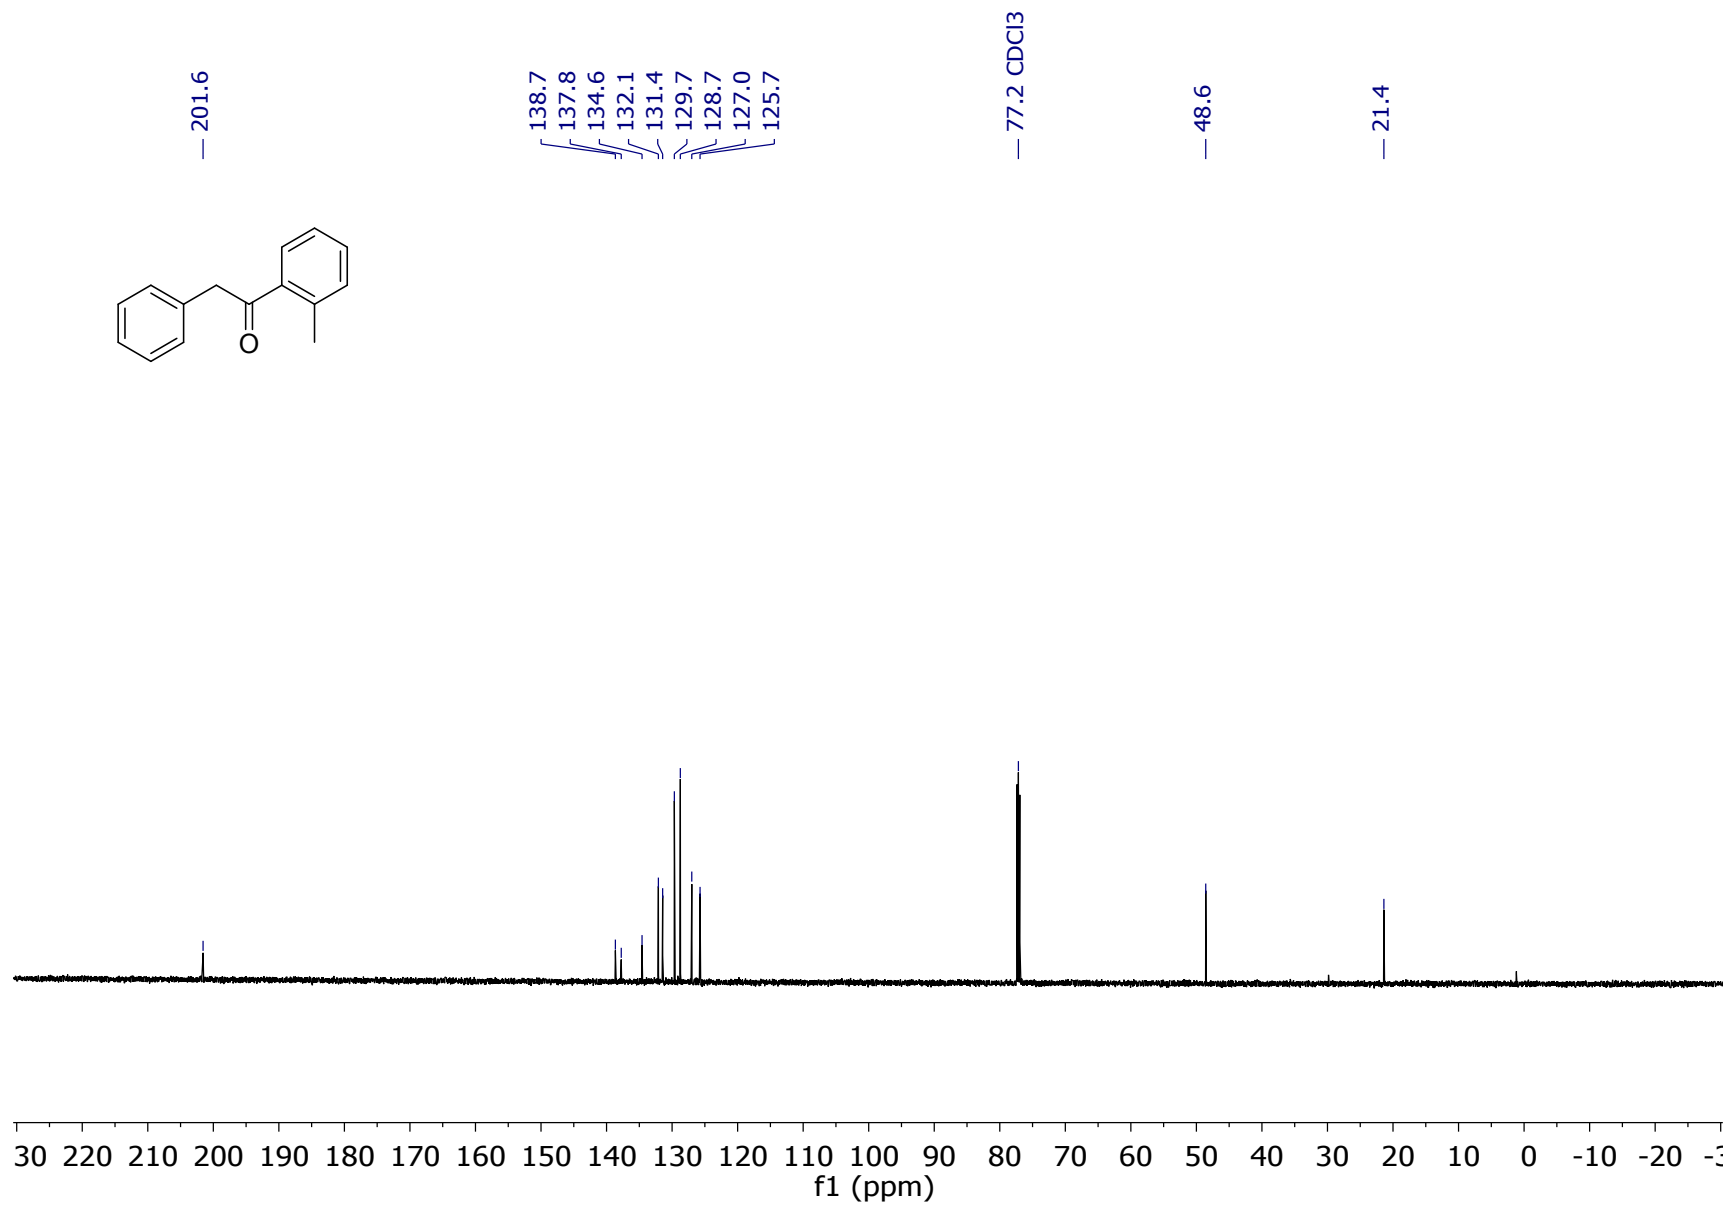

Figure S4.  $^{13}\text{C}\{^1\text{H}\}$  NMR (151 MHz, Chloroform-*d*) of 2-phenyl-1-o-tolyethanone (2a).

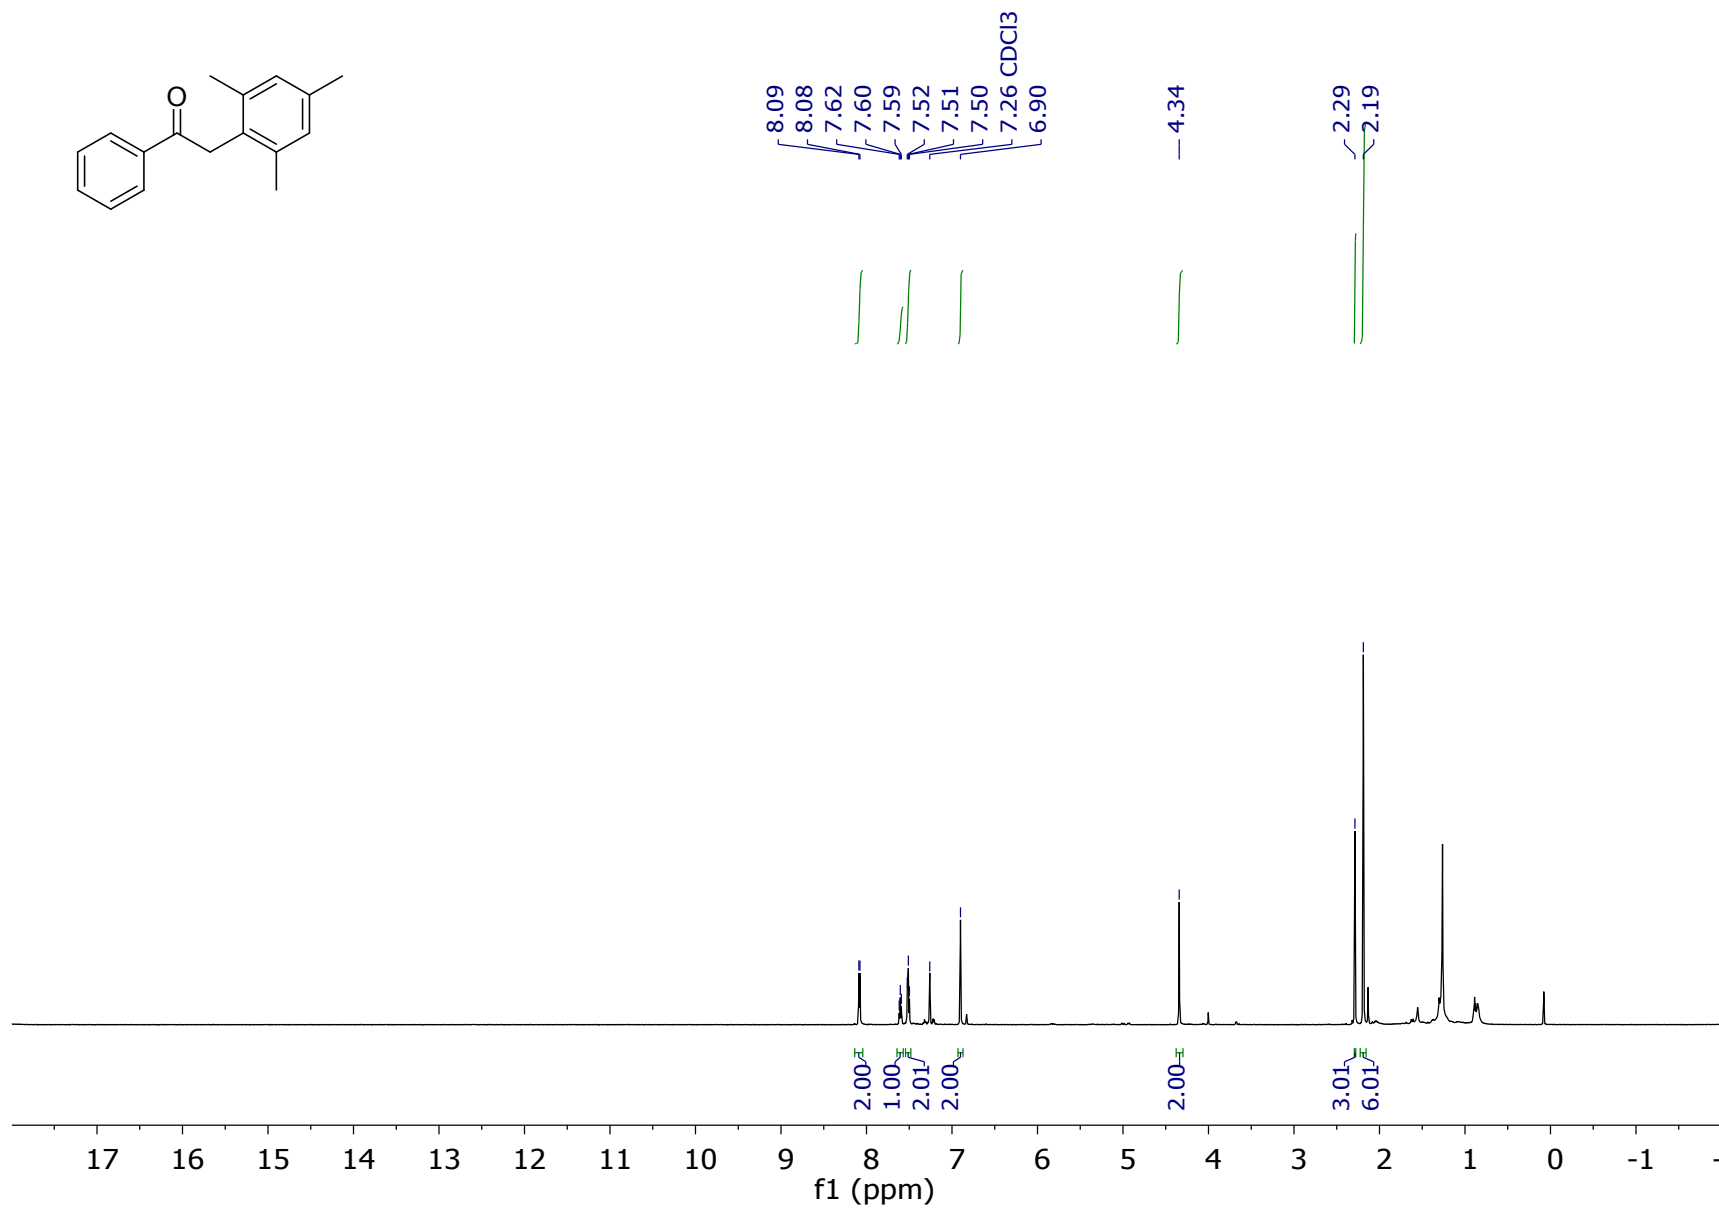

Figure S5. <sup>1</sup>H NMR (600 MHz, Chloroform-d) of 2-mesityl-1-phenylethanone (3b).

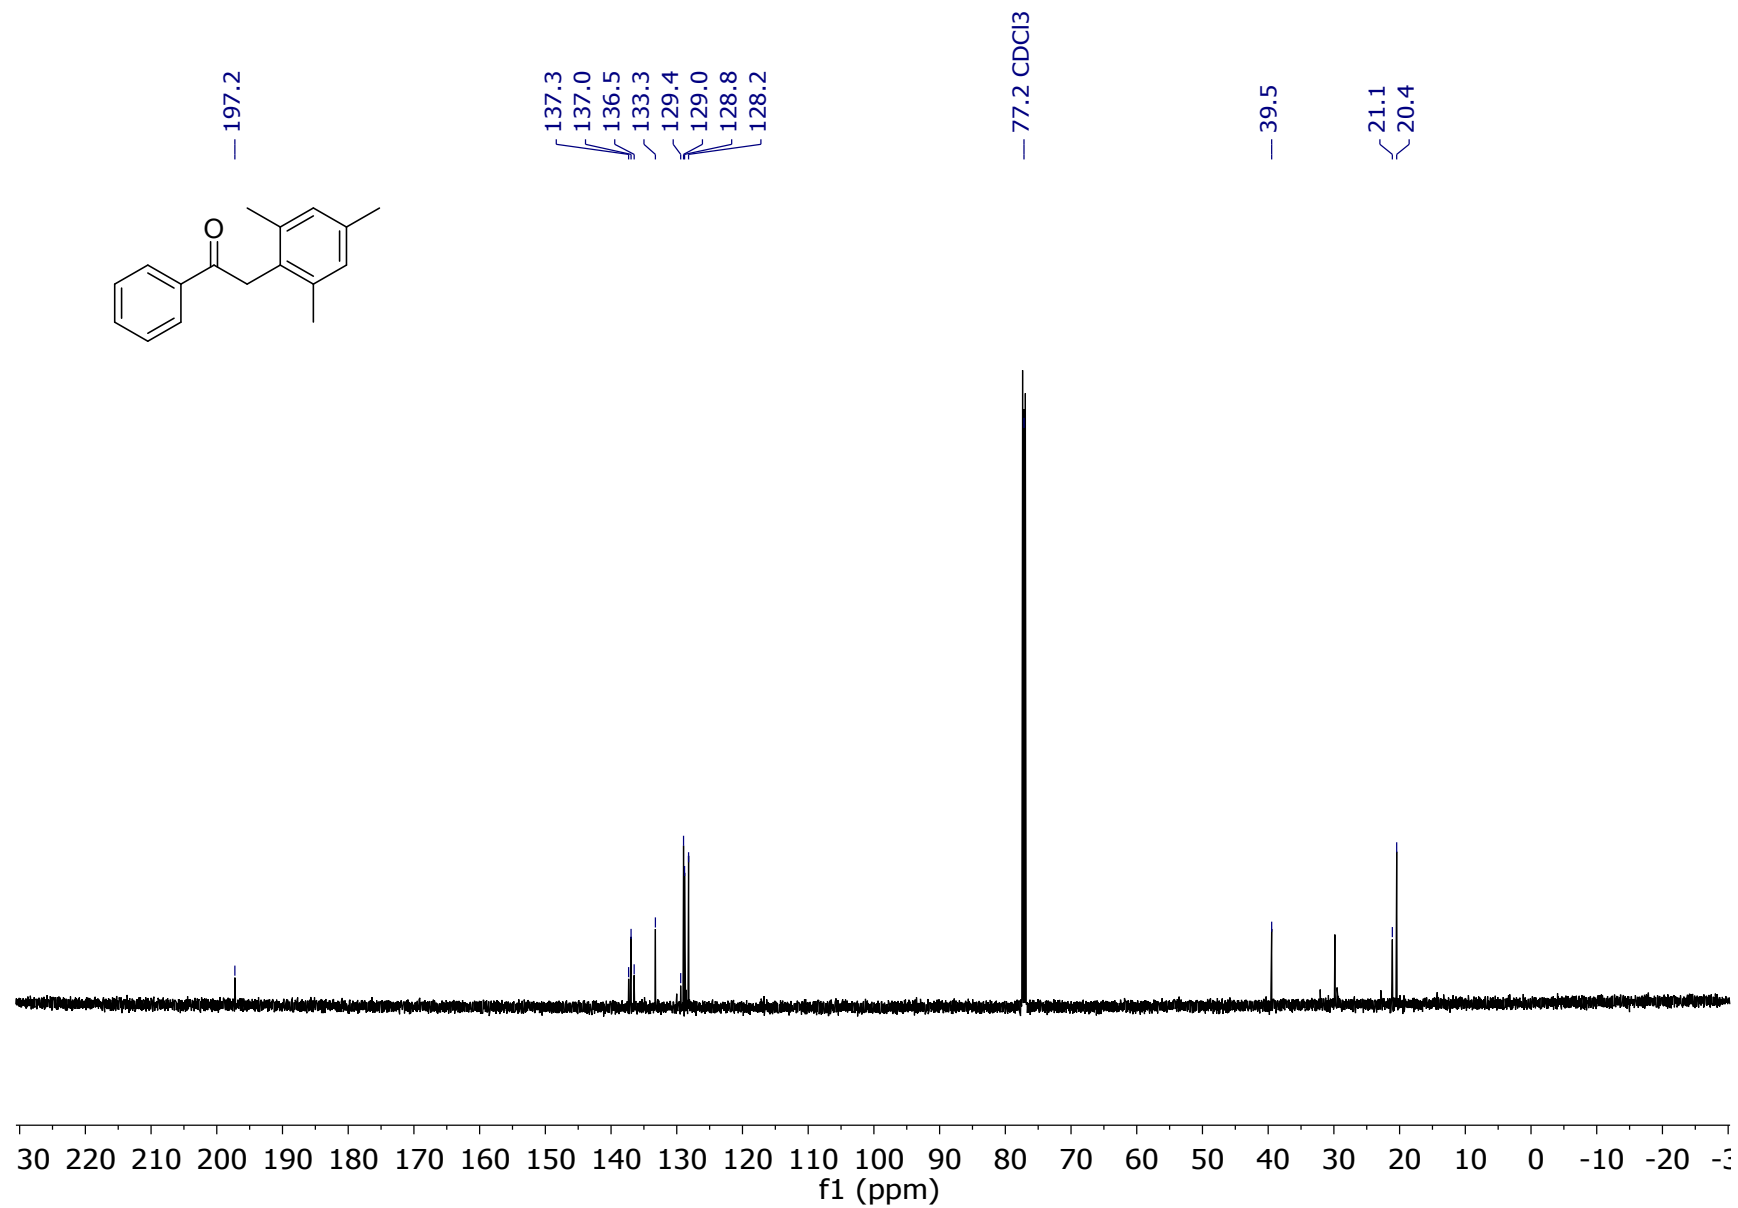

Figure S6.  $^{13}\text{C}\{^1\text{H}\}$  NMR (151 MHz, Chloroform-d) of 2-mesityl-1-phenylethanone (3b).



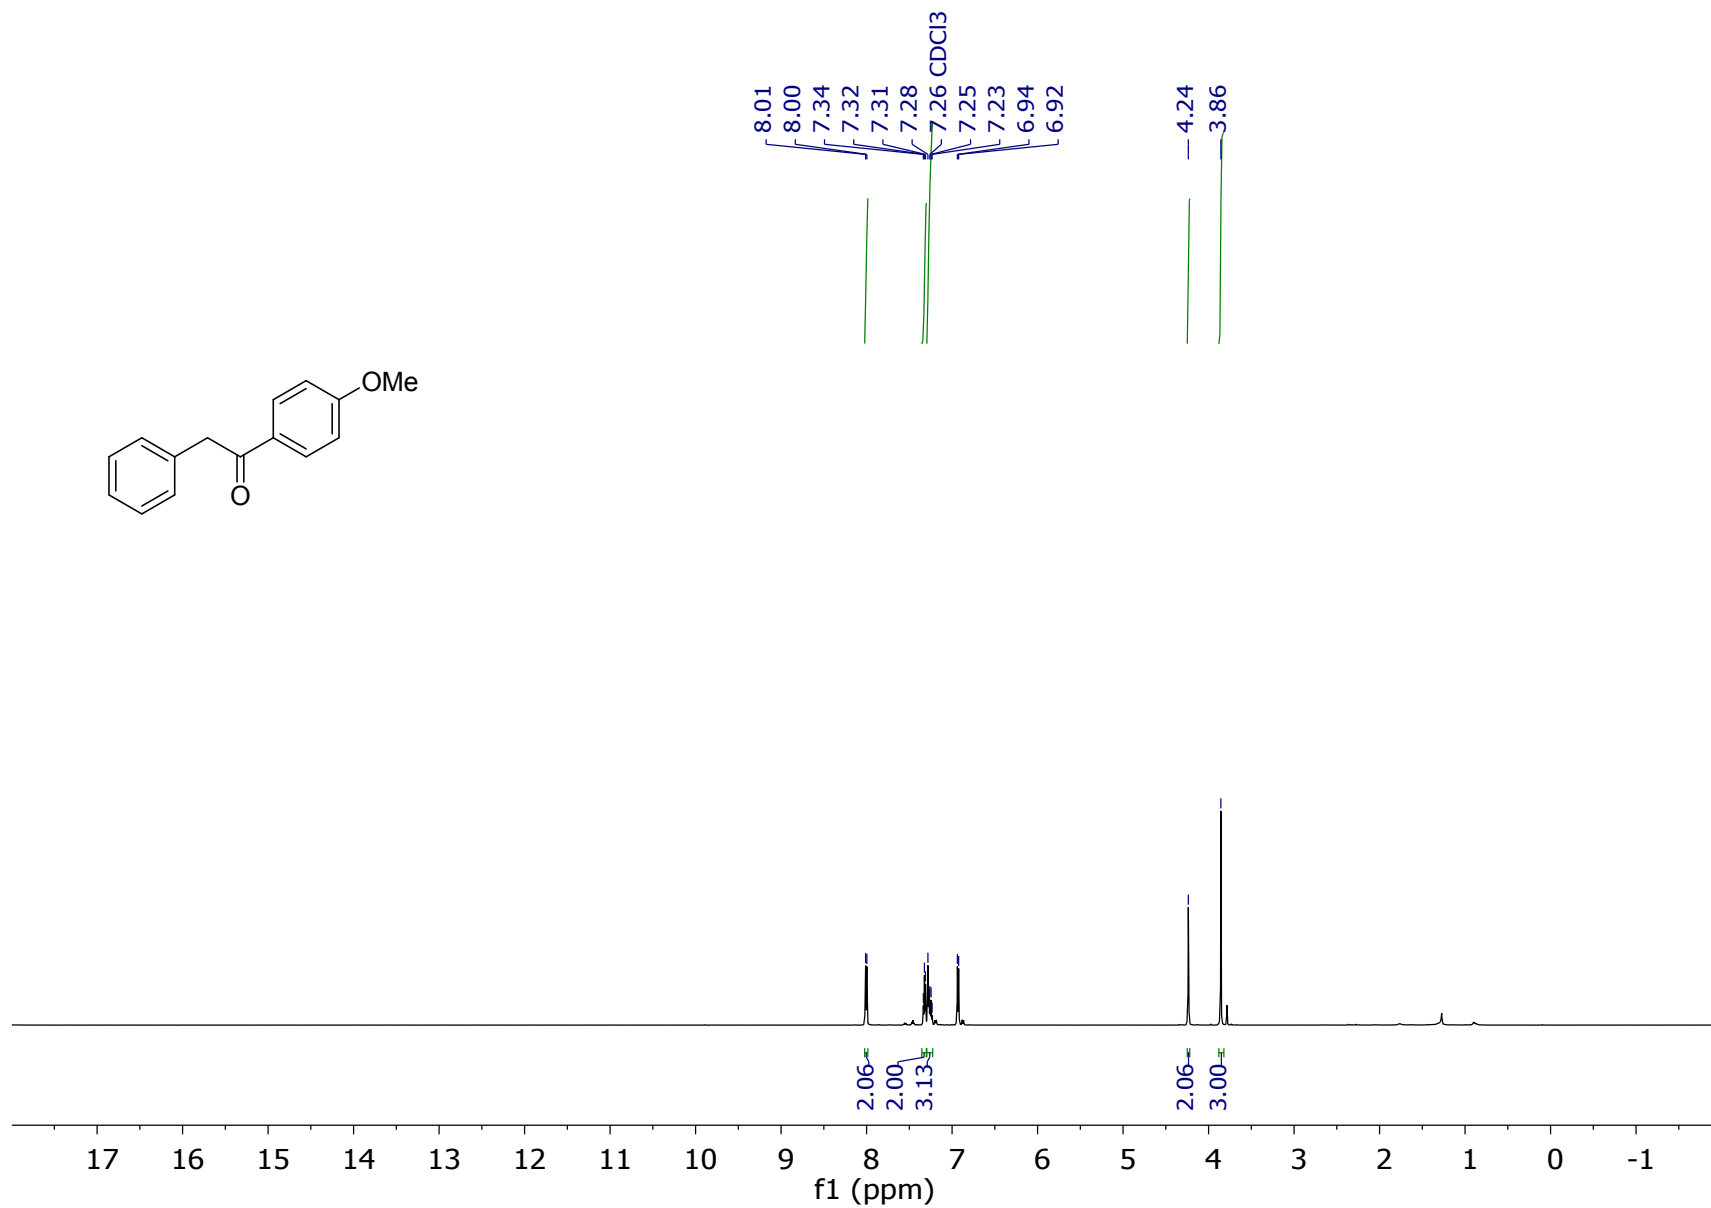

Figure S7. <sup>1</sup>H NMR (600 MHz, Chloroform-d) of 1-(4-methoxyphenyl)-2-phenylethanone (4a).

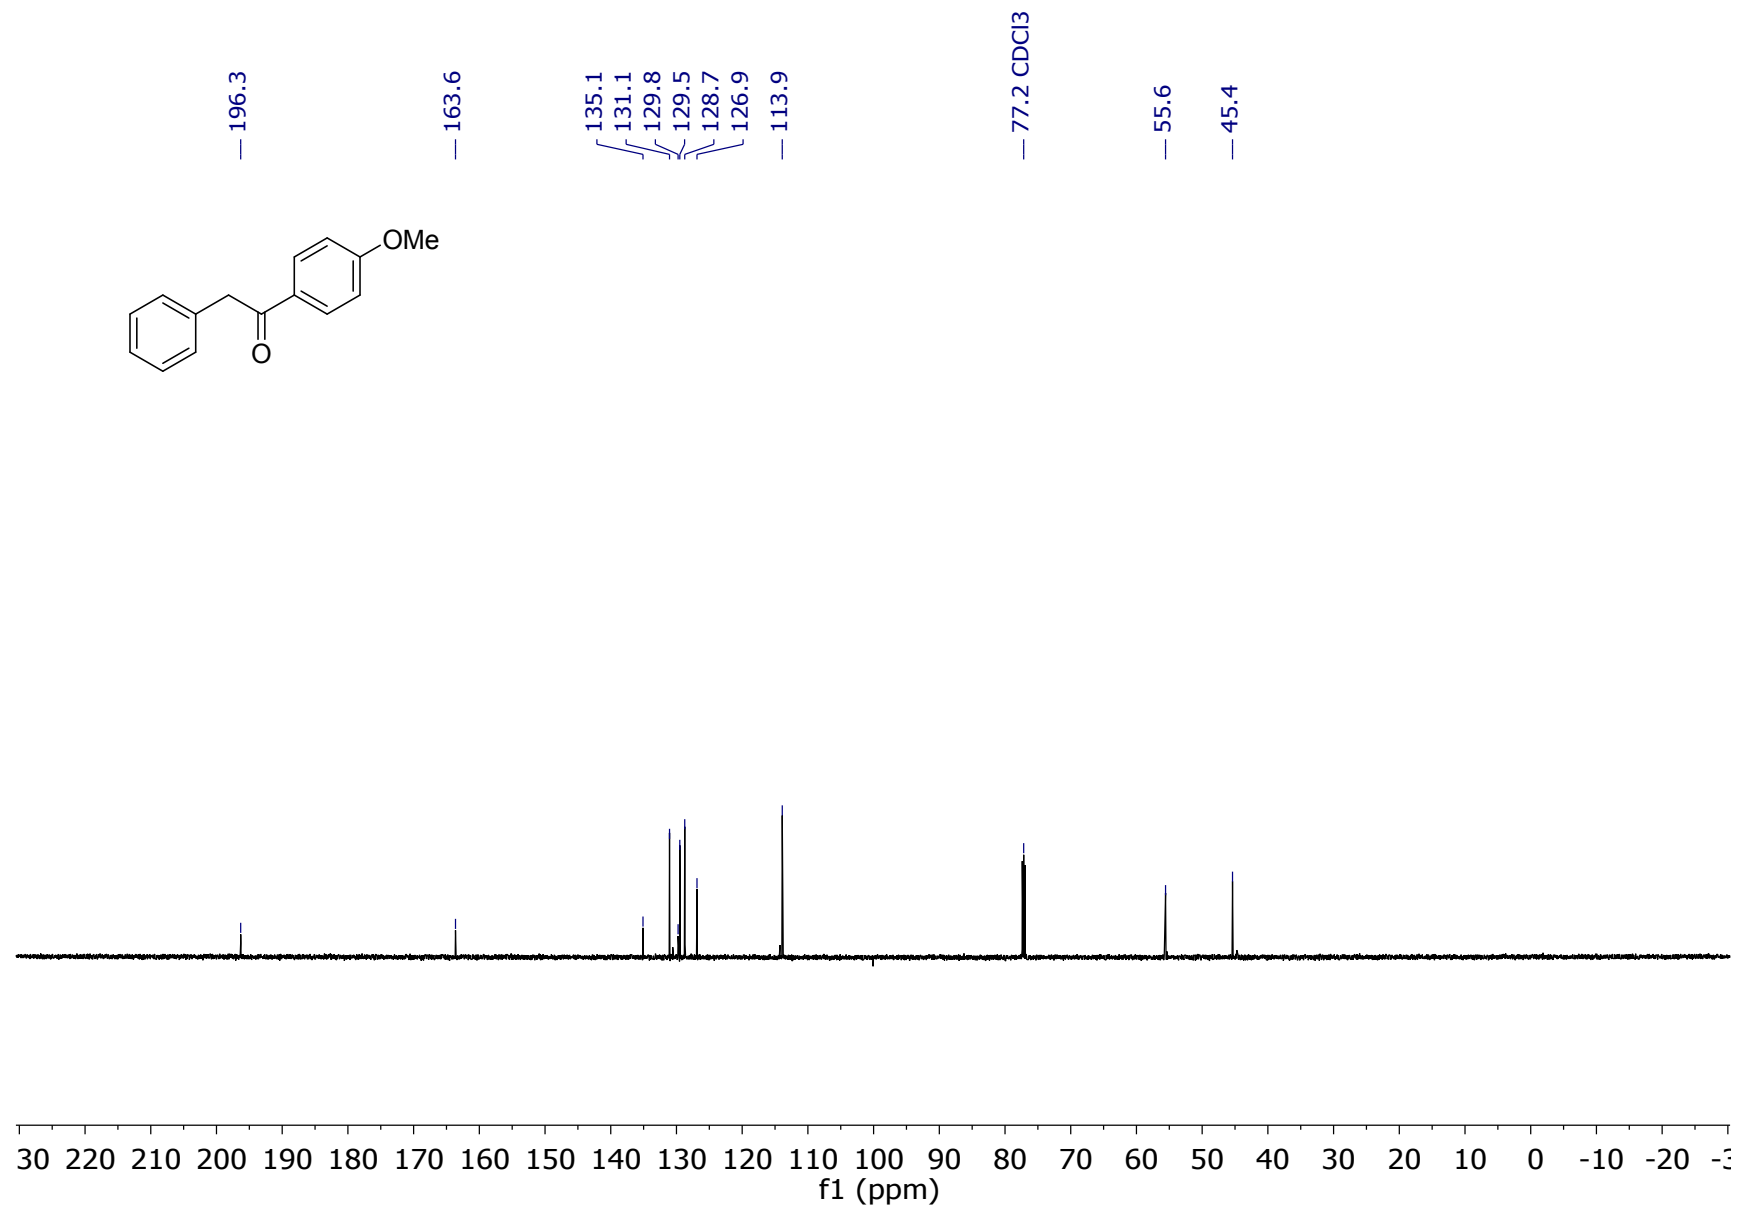

Figure S8.  $^{13}\text{C}\{^1\text{H}\}$  NMR (151 MHz, Chloroform-d) of 1-(4-methoxyphenyl)-2-phenylethanone (4a).

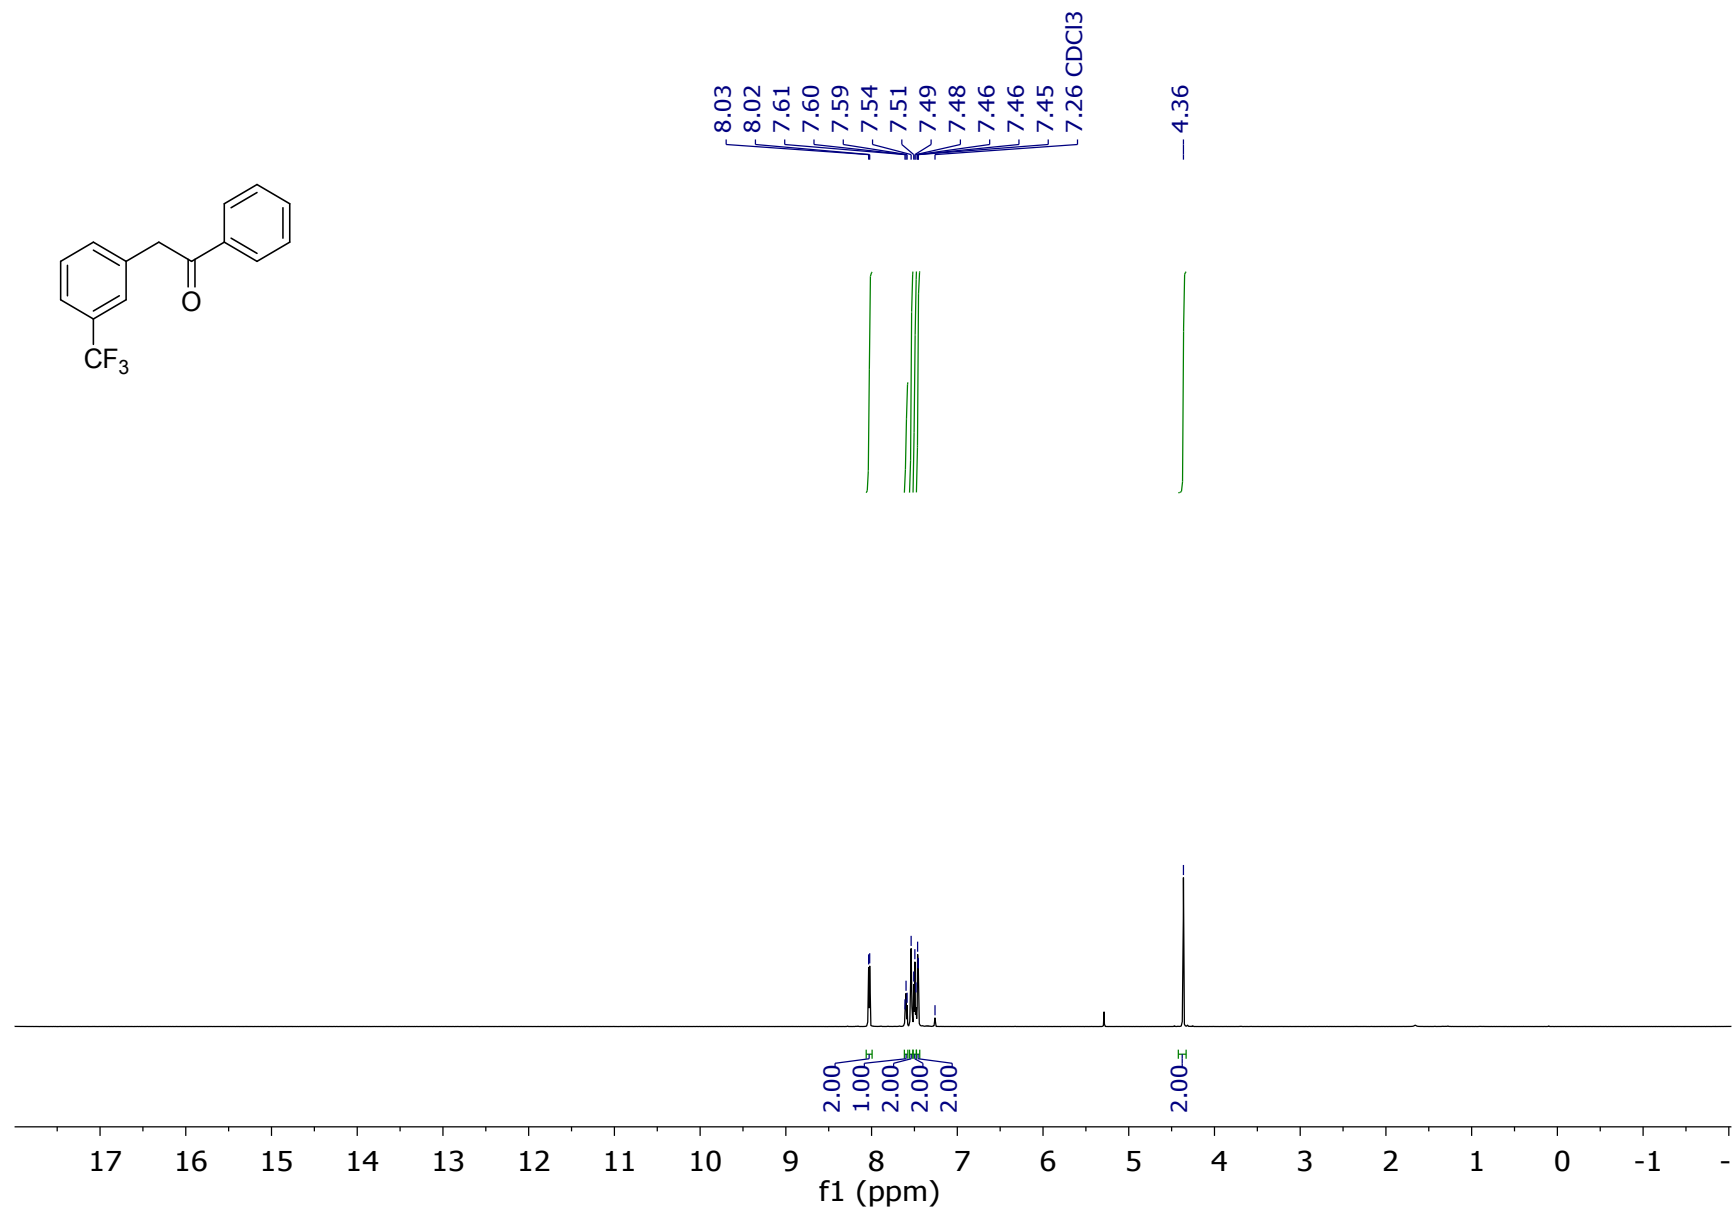

Figure S9. <sup>1</sup>H NMR (600 MHz, Chloroform-d) of 1-phenyl-2-(3-(trifluoromethyl)phenyl)ethanone (5a).

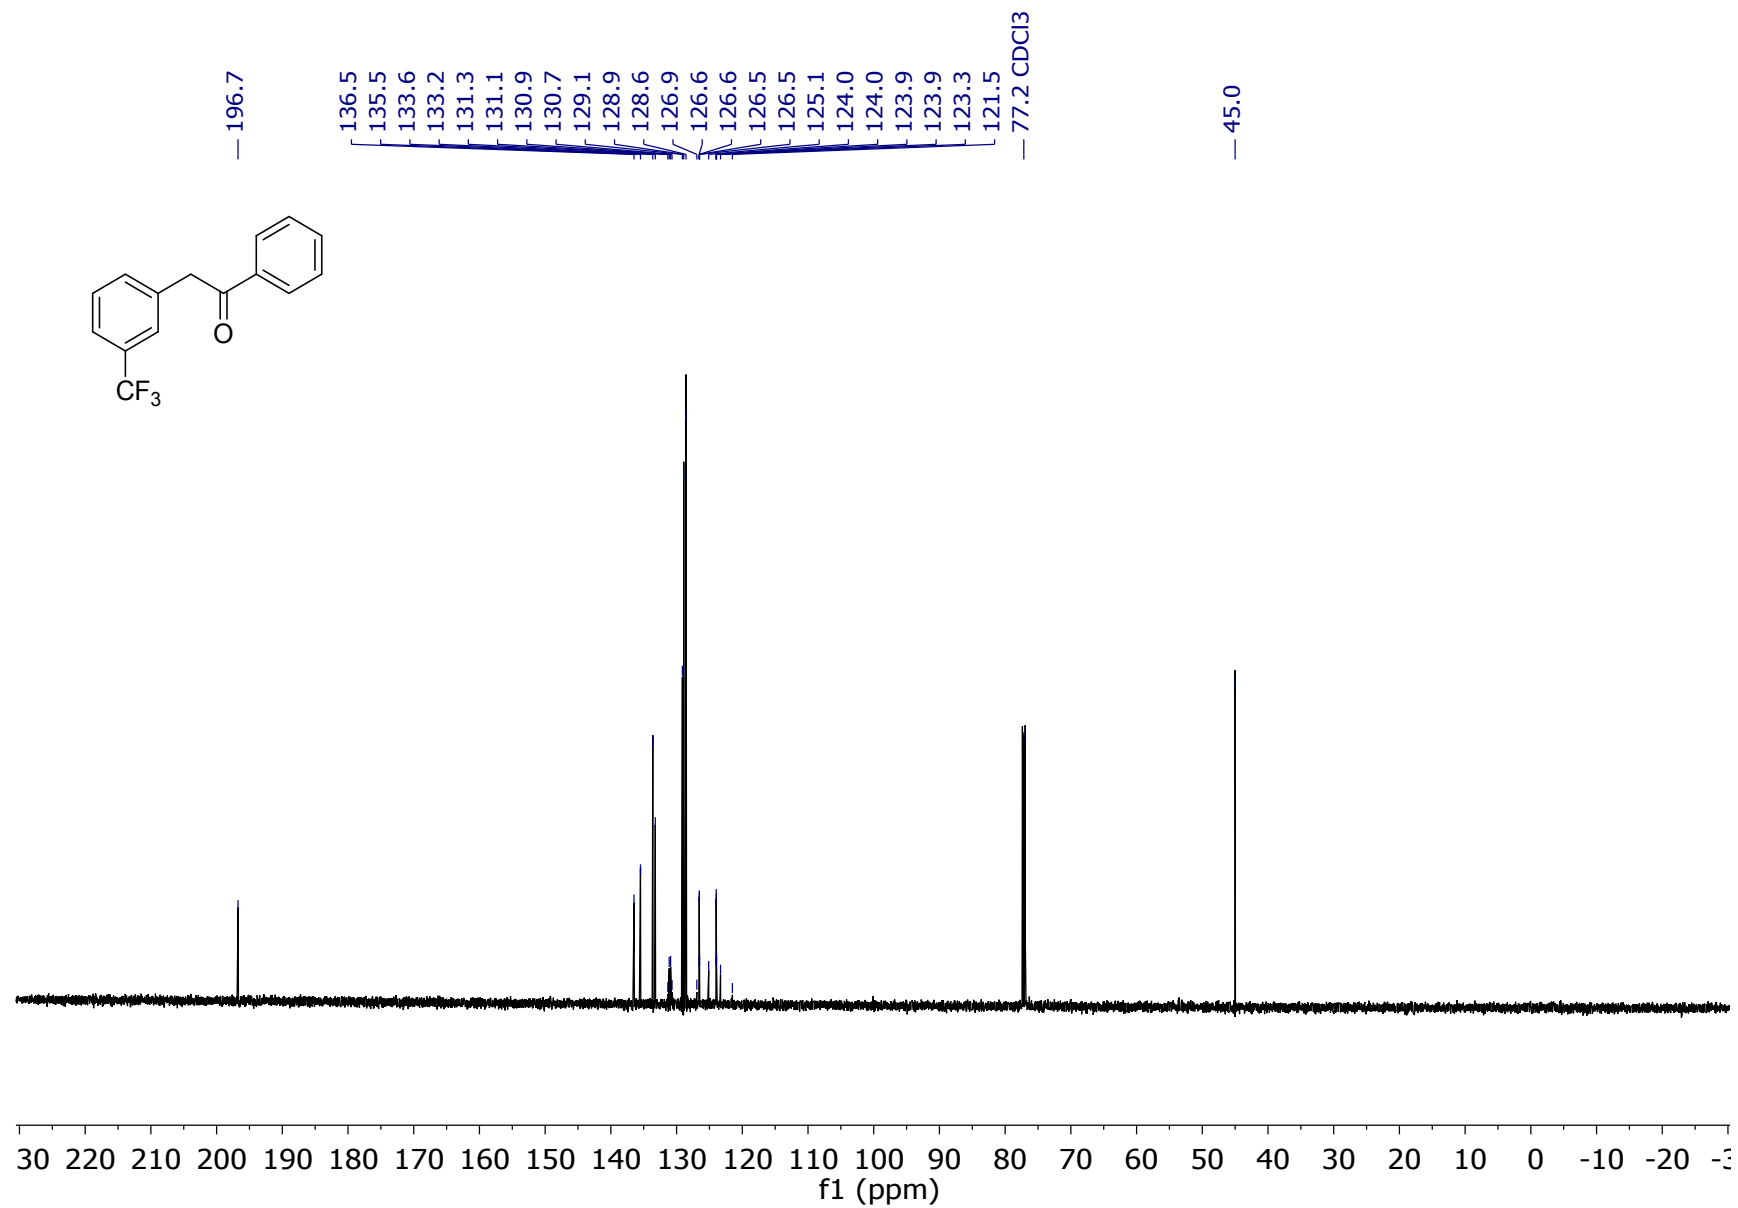

Figure S10.  $^{13}\text{C}\{^1\text{H}\}$  NMR (151 MHz, Chloroform-d) of 1-phenyl-2-(3-(trifluoromethyl)phenyl)ethanone (5a).

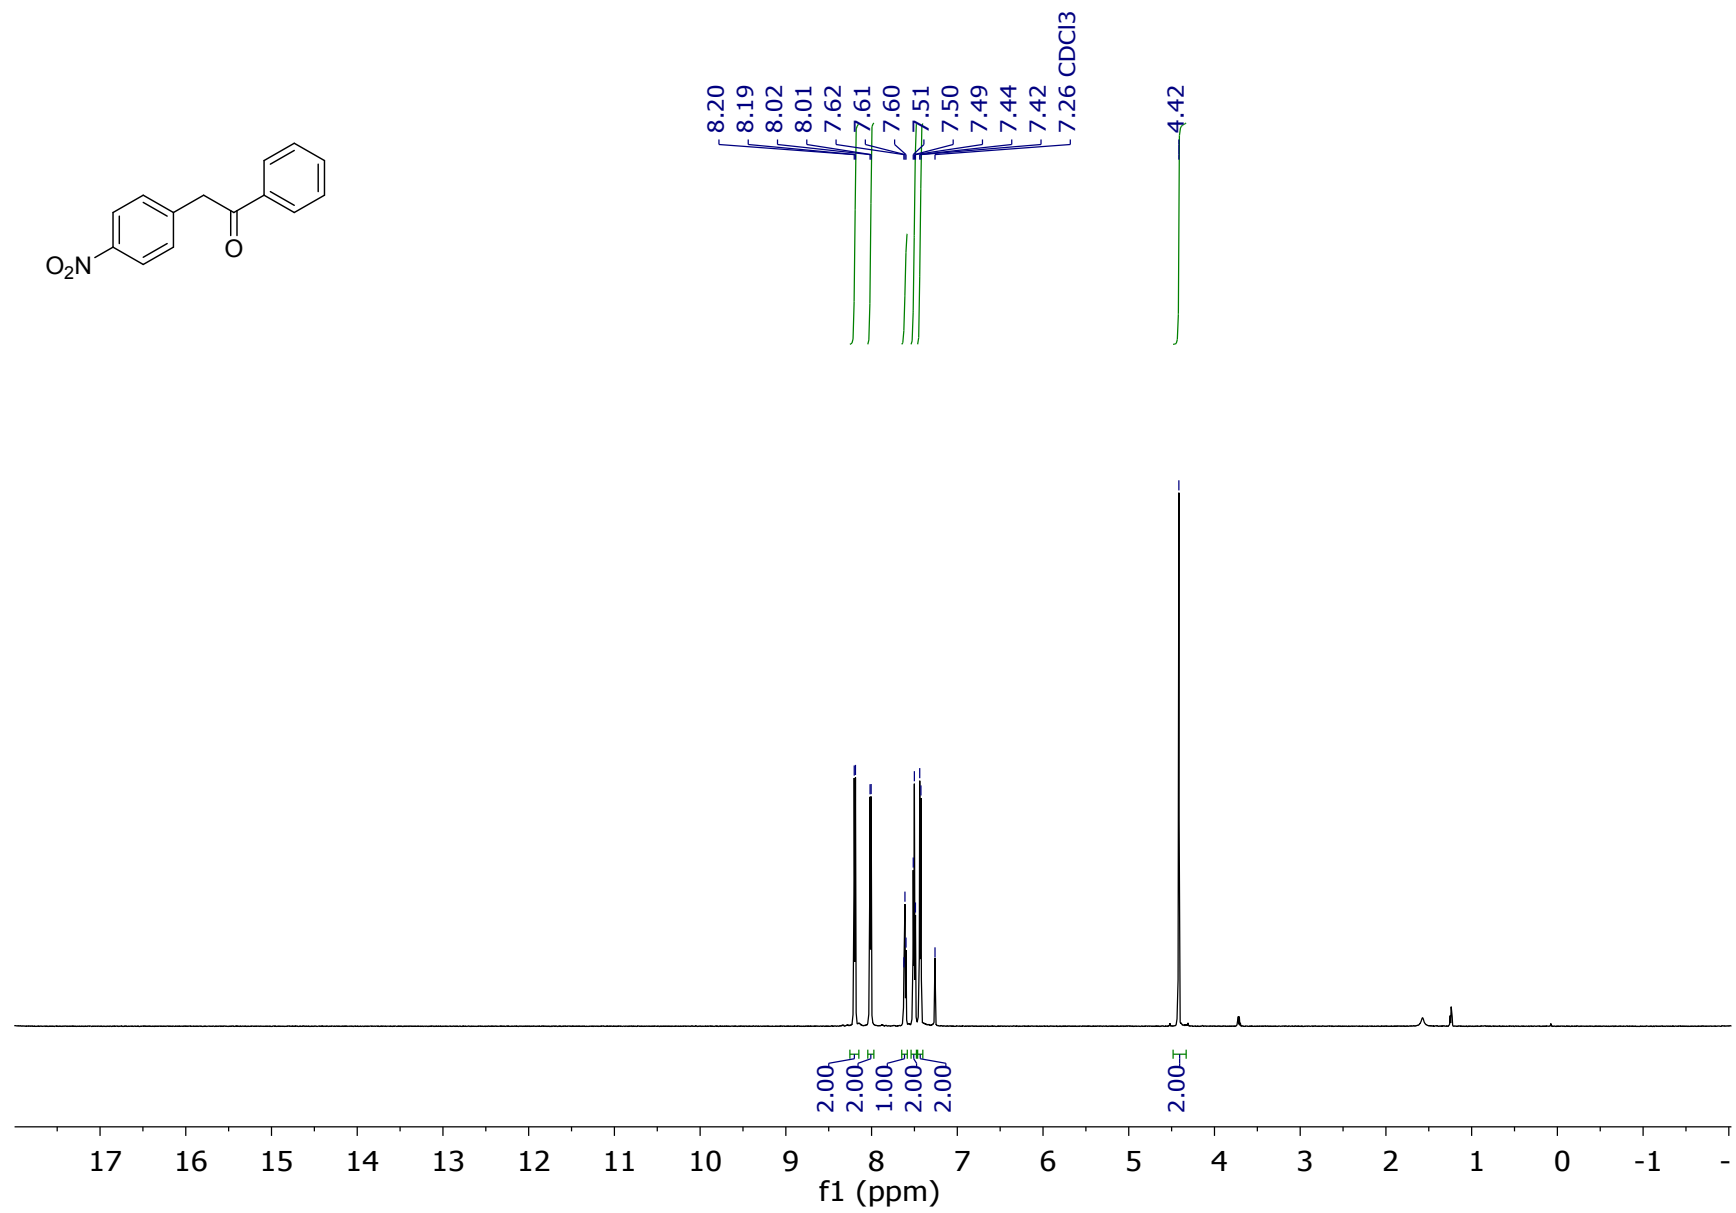

Figure S11. <sup>1</sup>H NMR (600 MHz, Chloroform-d) of 2-(4-nitrophenyl)-1-phenylethanone (6a).

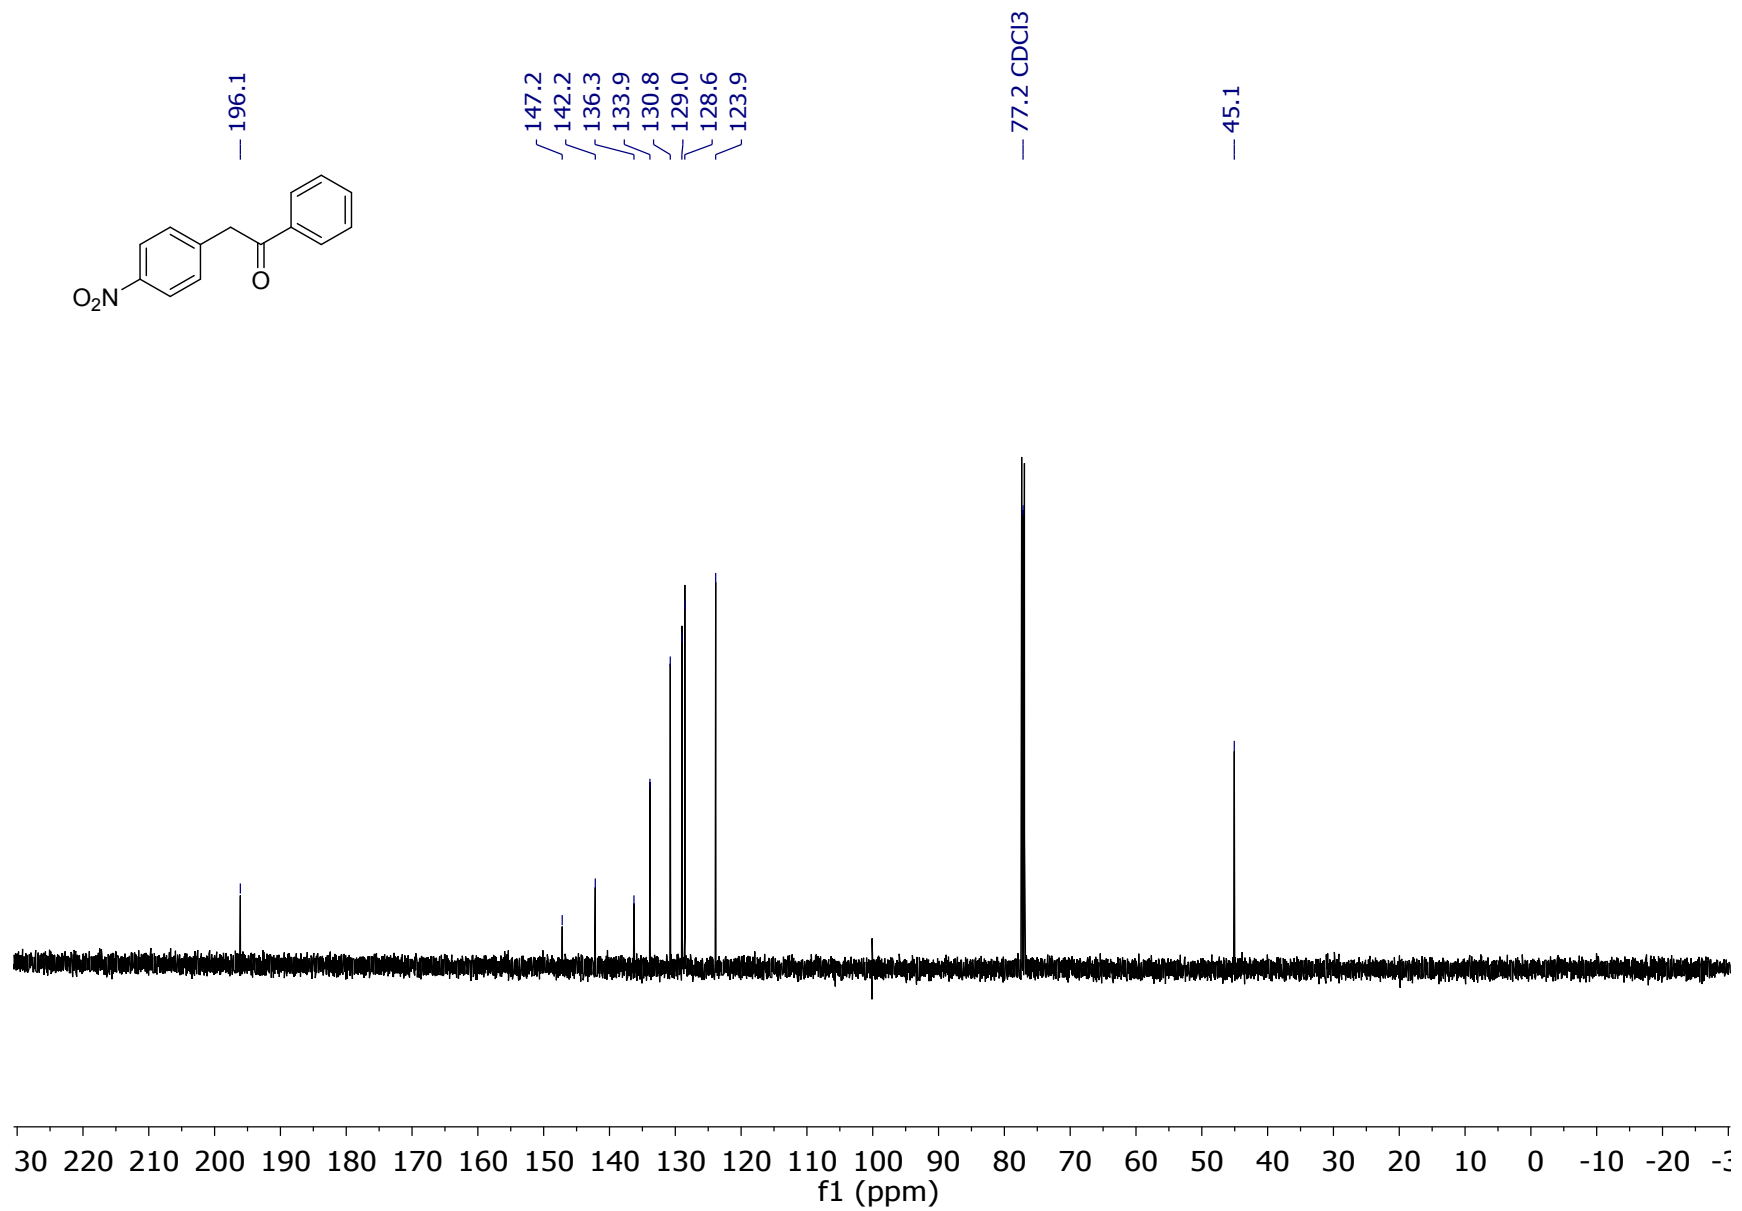

Figure S12.  $^{13}\text{C}\{^1\text{H}\}$  NMR (151 MHz, Chloroform-d) of 2-(4-nitrophenyl)-1-phenylethanone (6a).

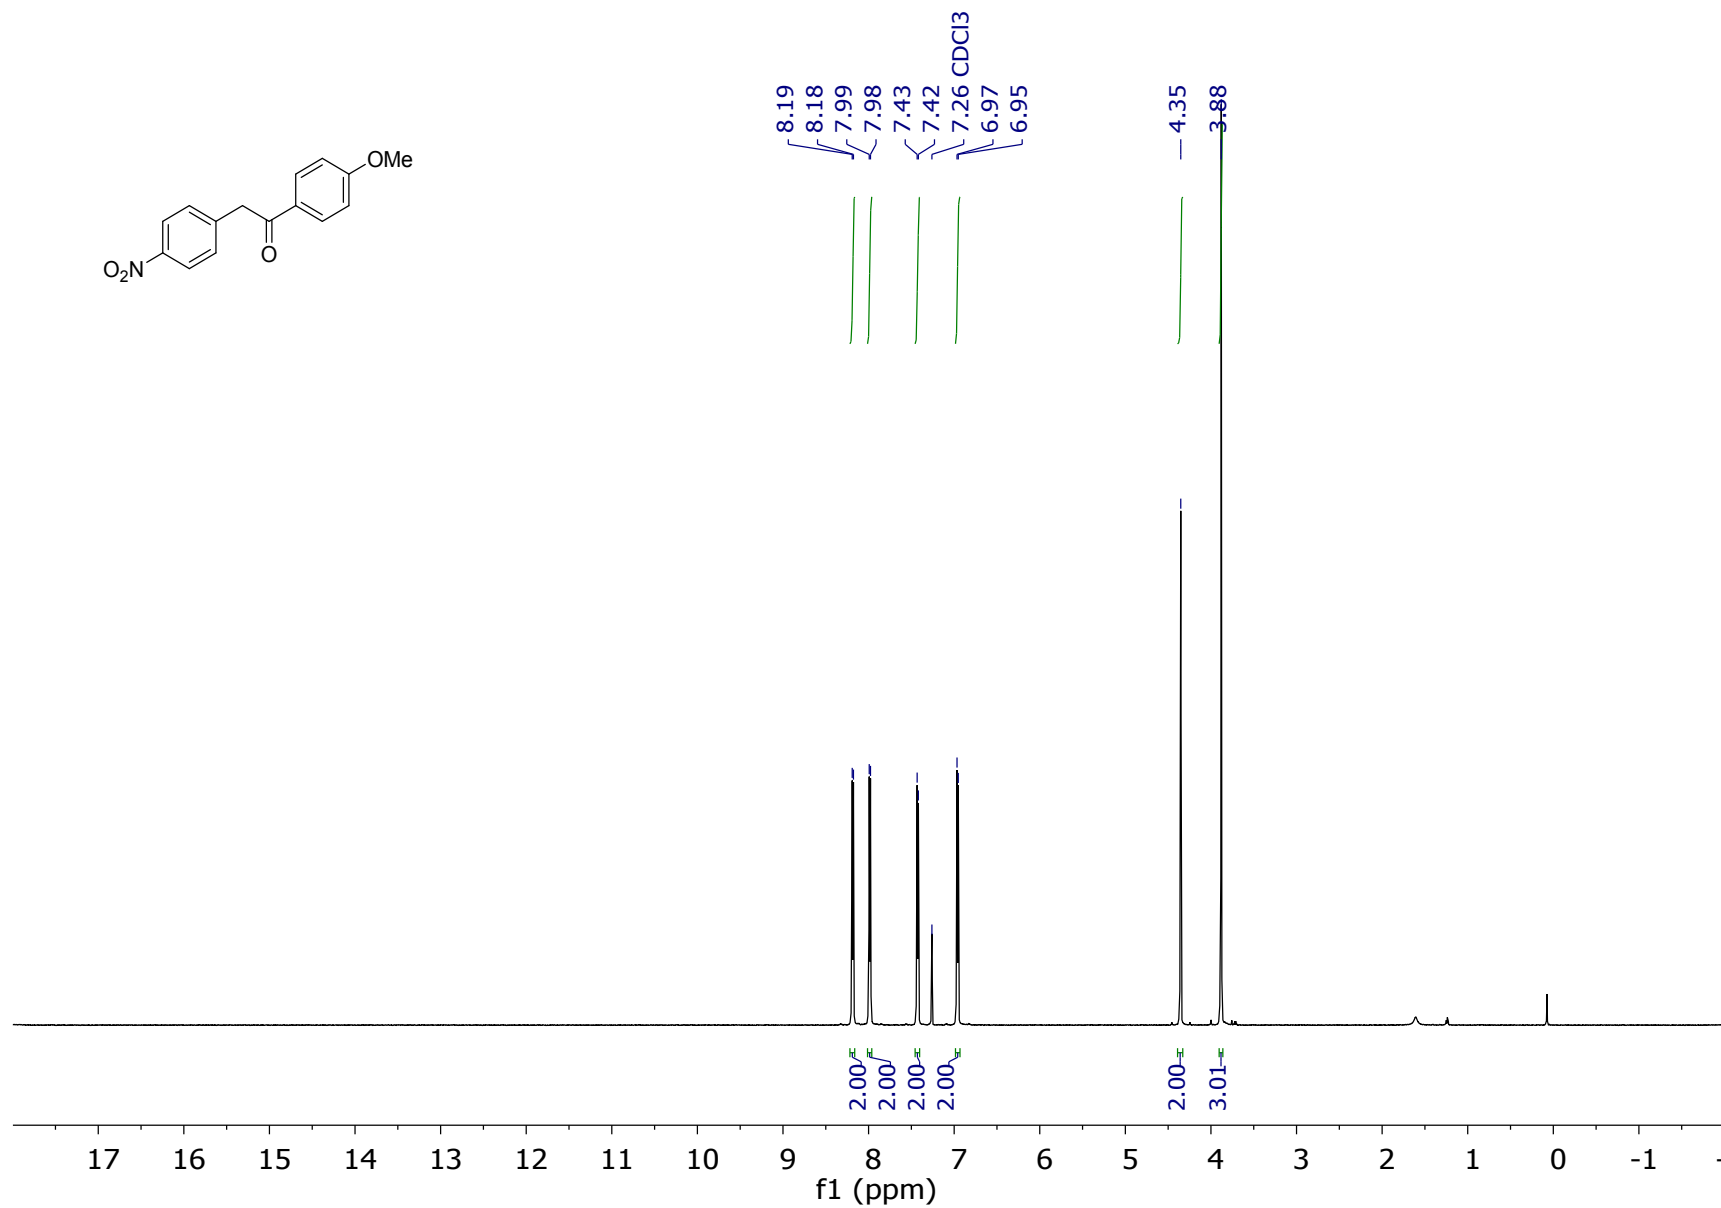

Figure S13. <sup>1</sup>H NMR (600 MHz, Chloroform-d) of 1-(4-methoxyphenyl)-2-(4-nitrophenyl)ethanone (7a).

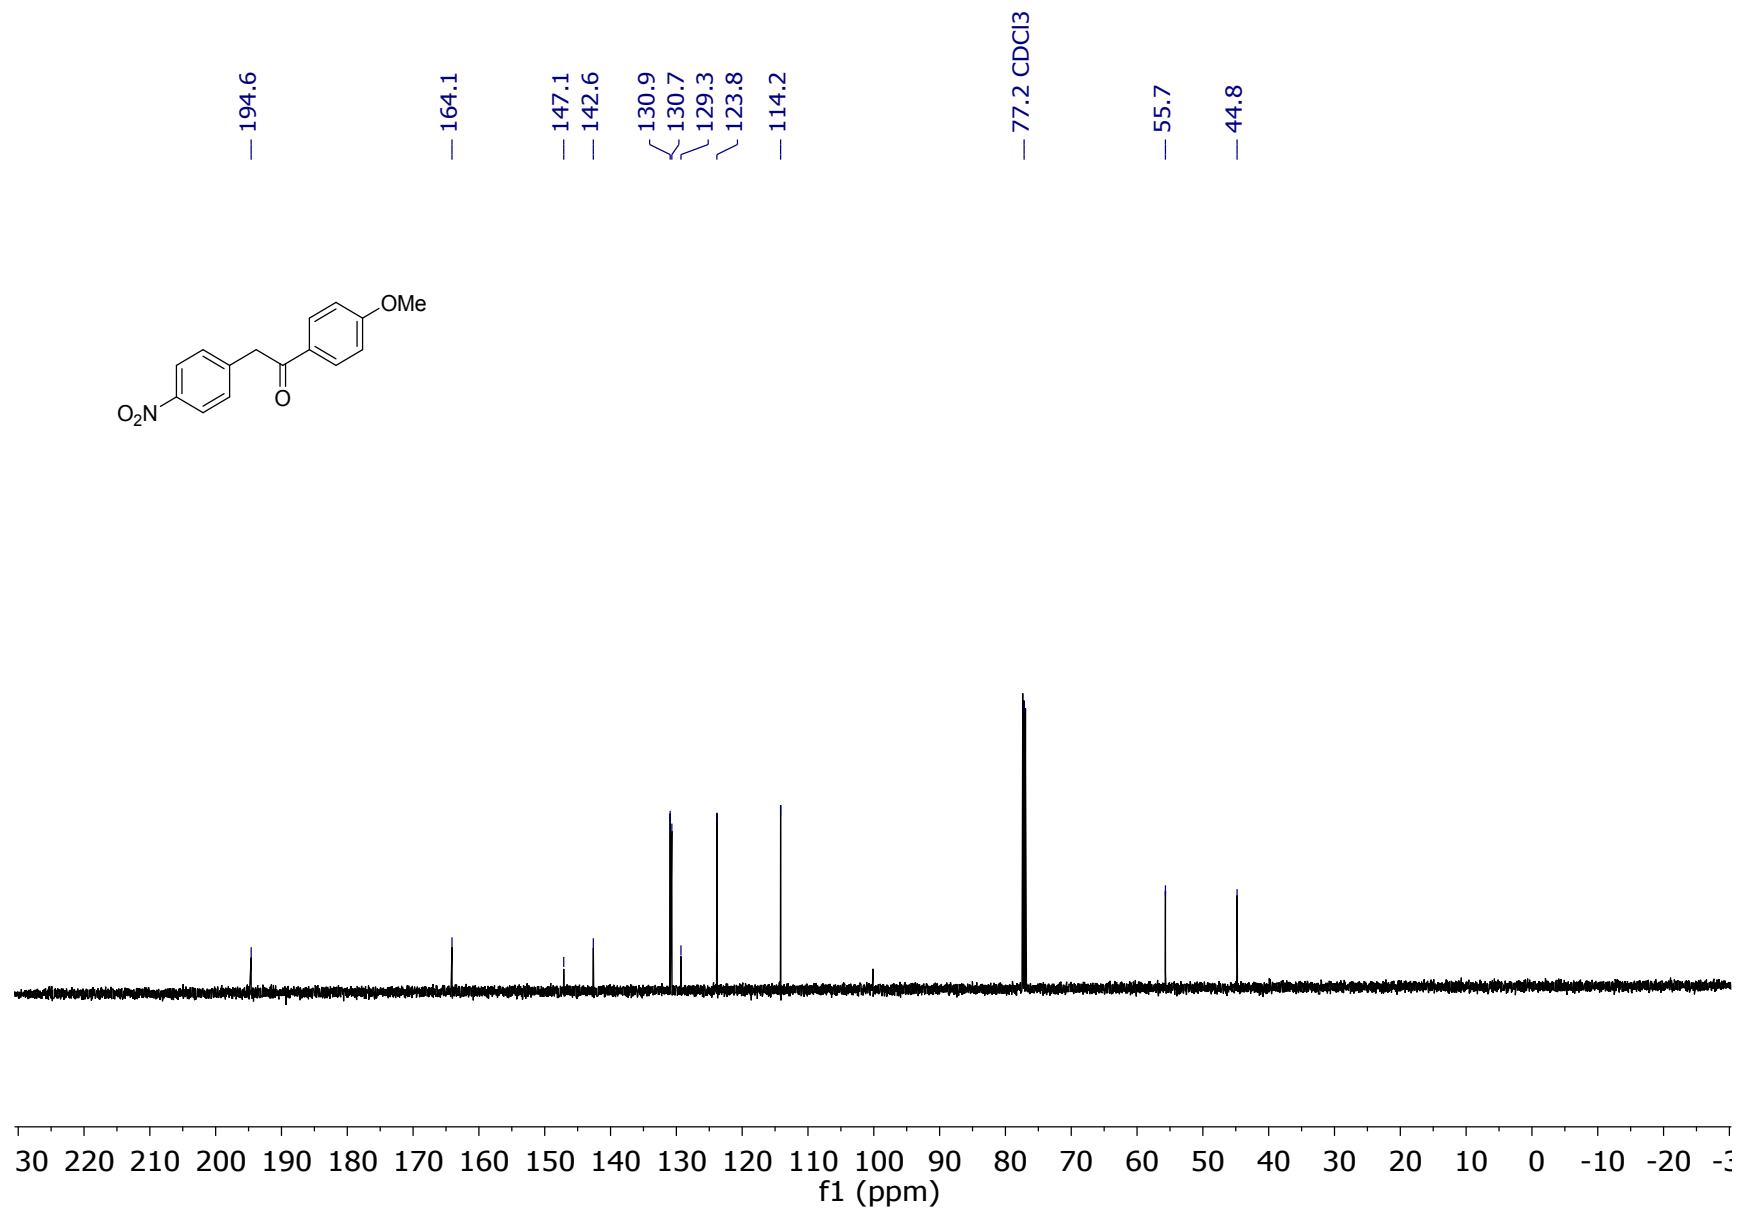

Figure S14.  $^{13}\text{C}\{^1\text{H}\}$  NMR (151 MHz, Chloroform-d) of 1-(4-methoxyphenyl)-2-(4-nitrophenyl)ethanone (7a).



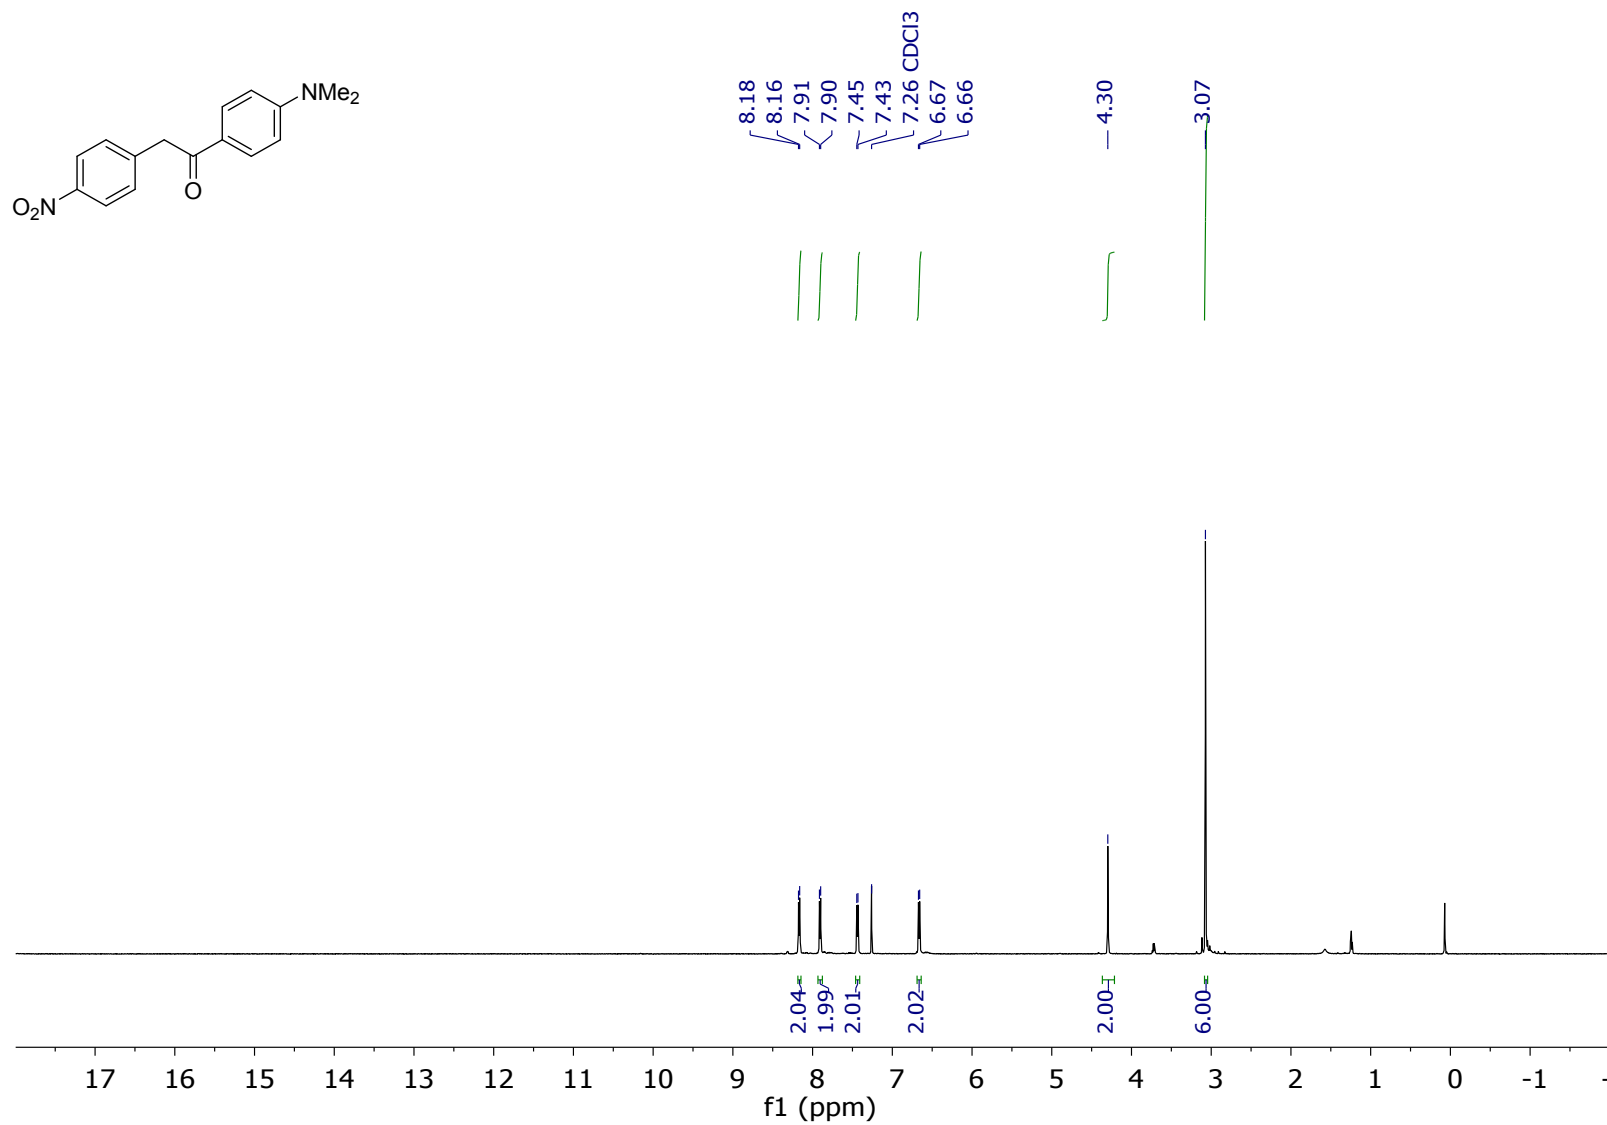

Figure S15. <sup>1</sup>H NMR (600 MHz, Chloroform-d) of 1-(4-(dimethylamino)phenyl)-2-(4-nitrophenyl)ethanone (8a).

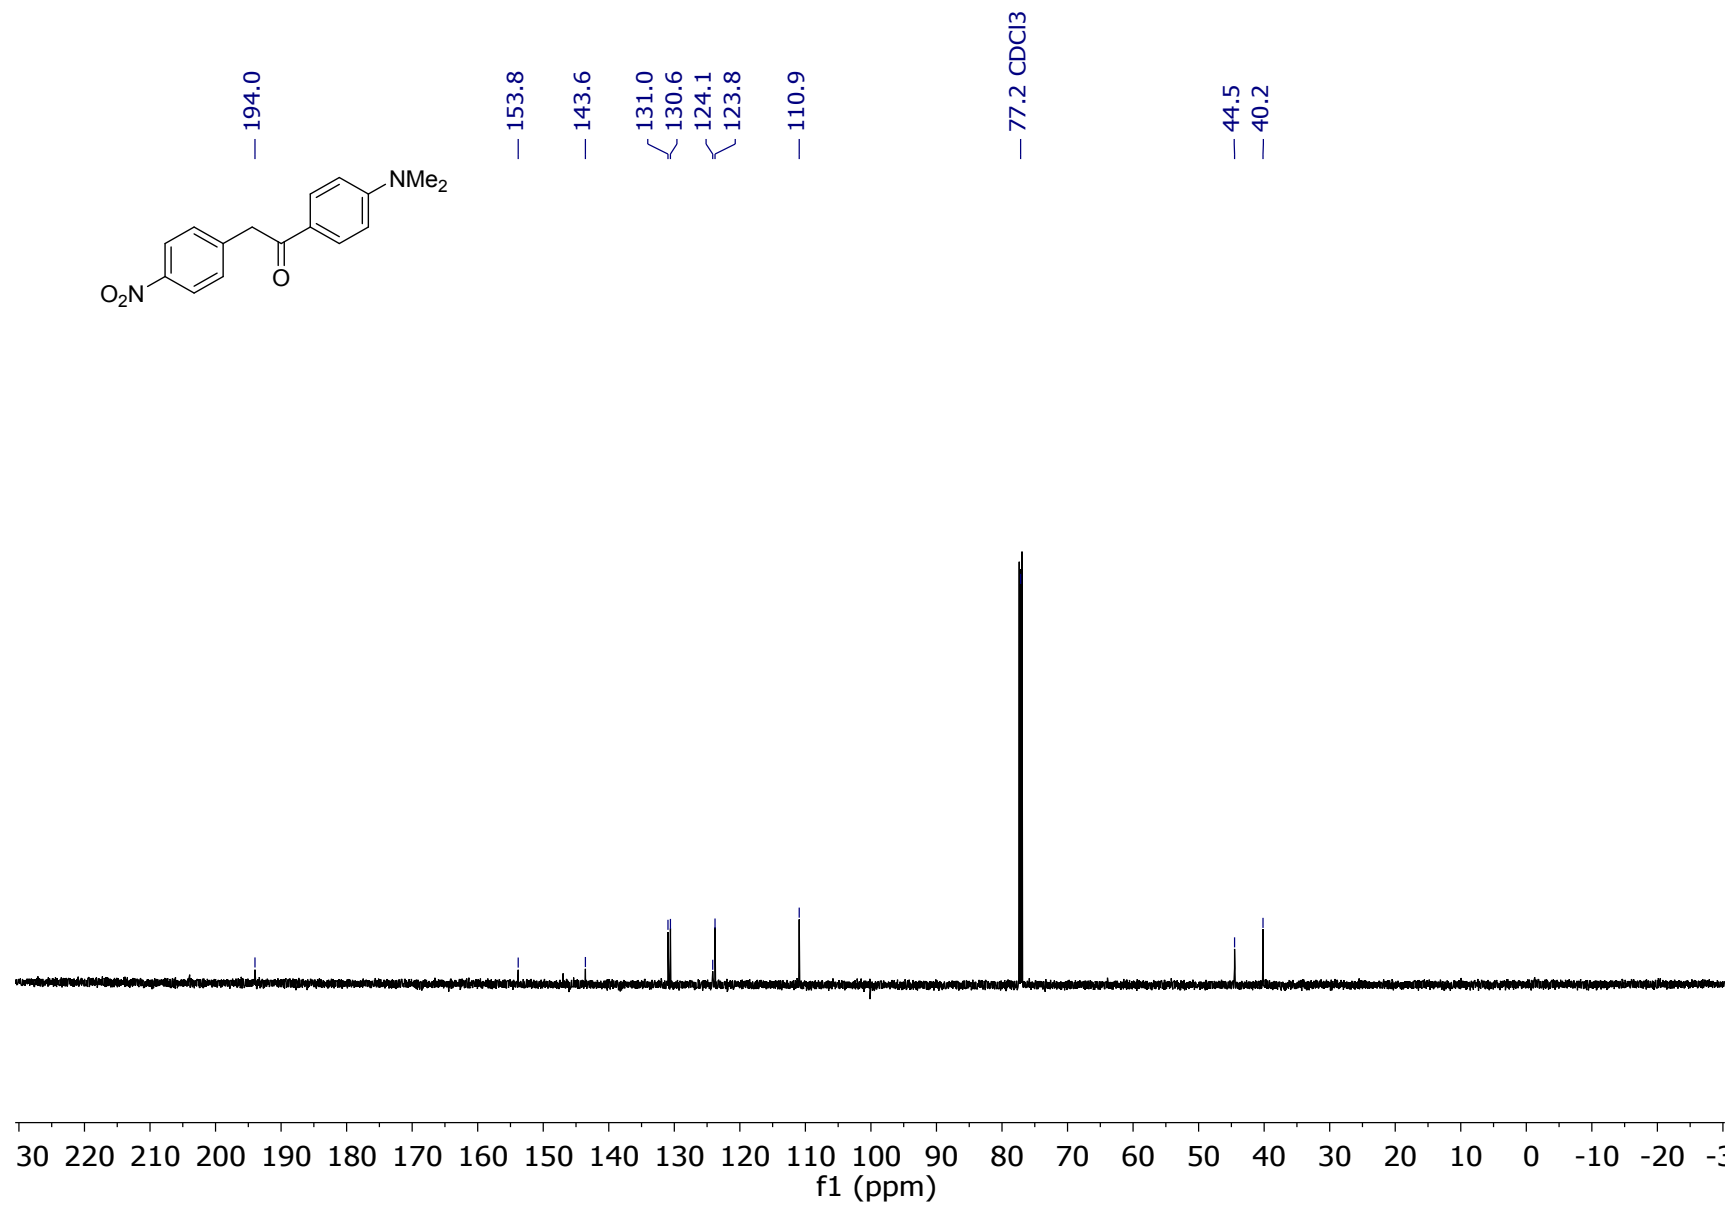

Figure S16.  $^{13}\text{C}\{^1\text{H}\}$  NMR (151 MHz, Chloroform-d) of 1-(4-(dimethylamino)phenyl)-2-(4-nitrophenyl)ethanone (8a).

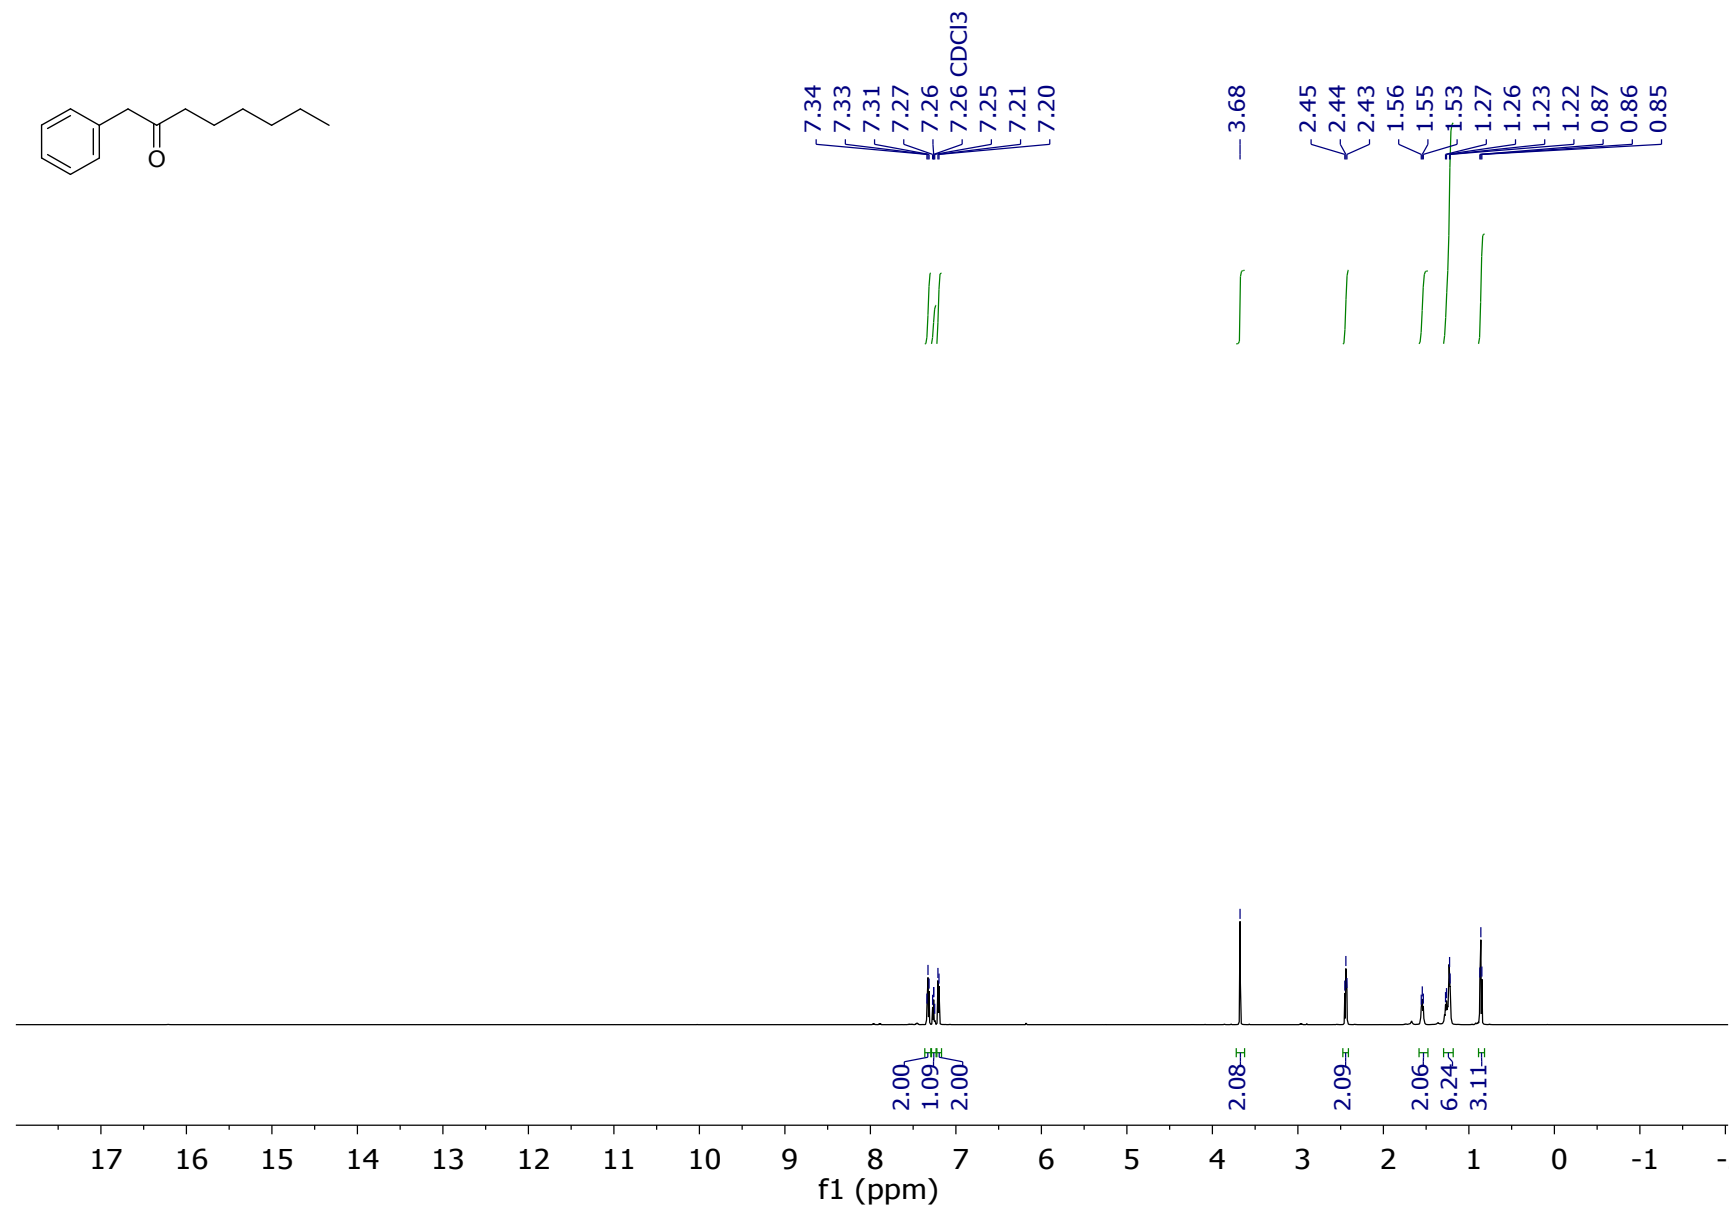

Figure S17. <sup>1</sup>H NMR (600 MHz, Chloroform-d) of 1-phenyloctan-2-one (9b).

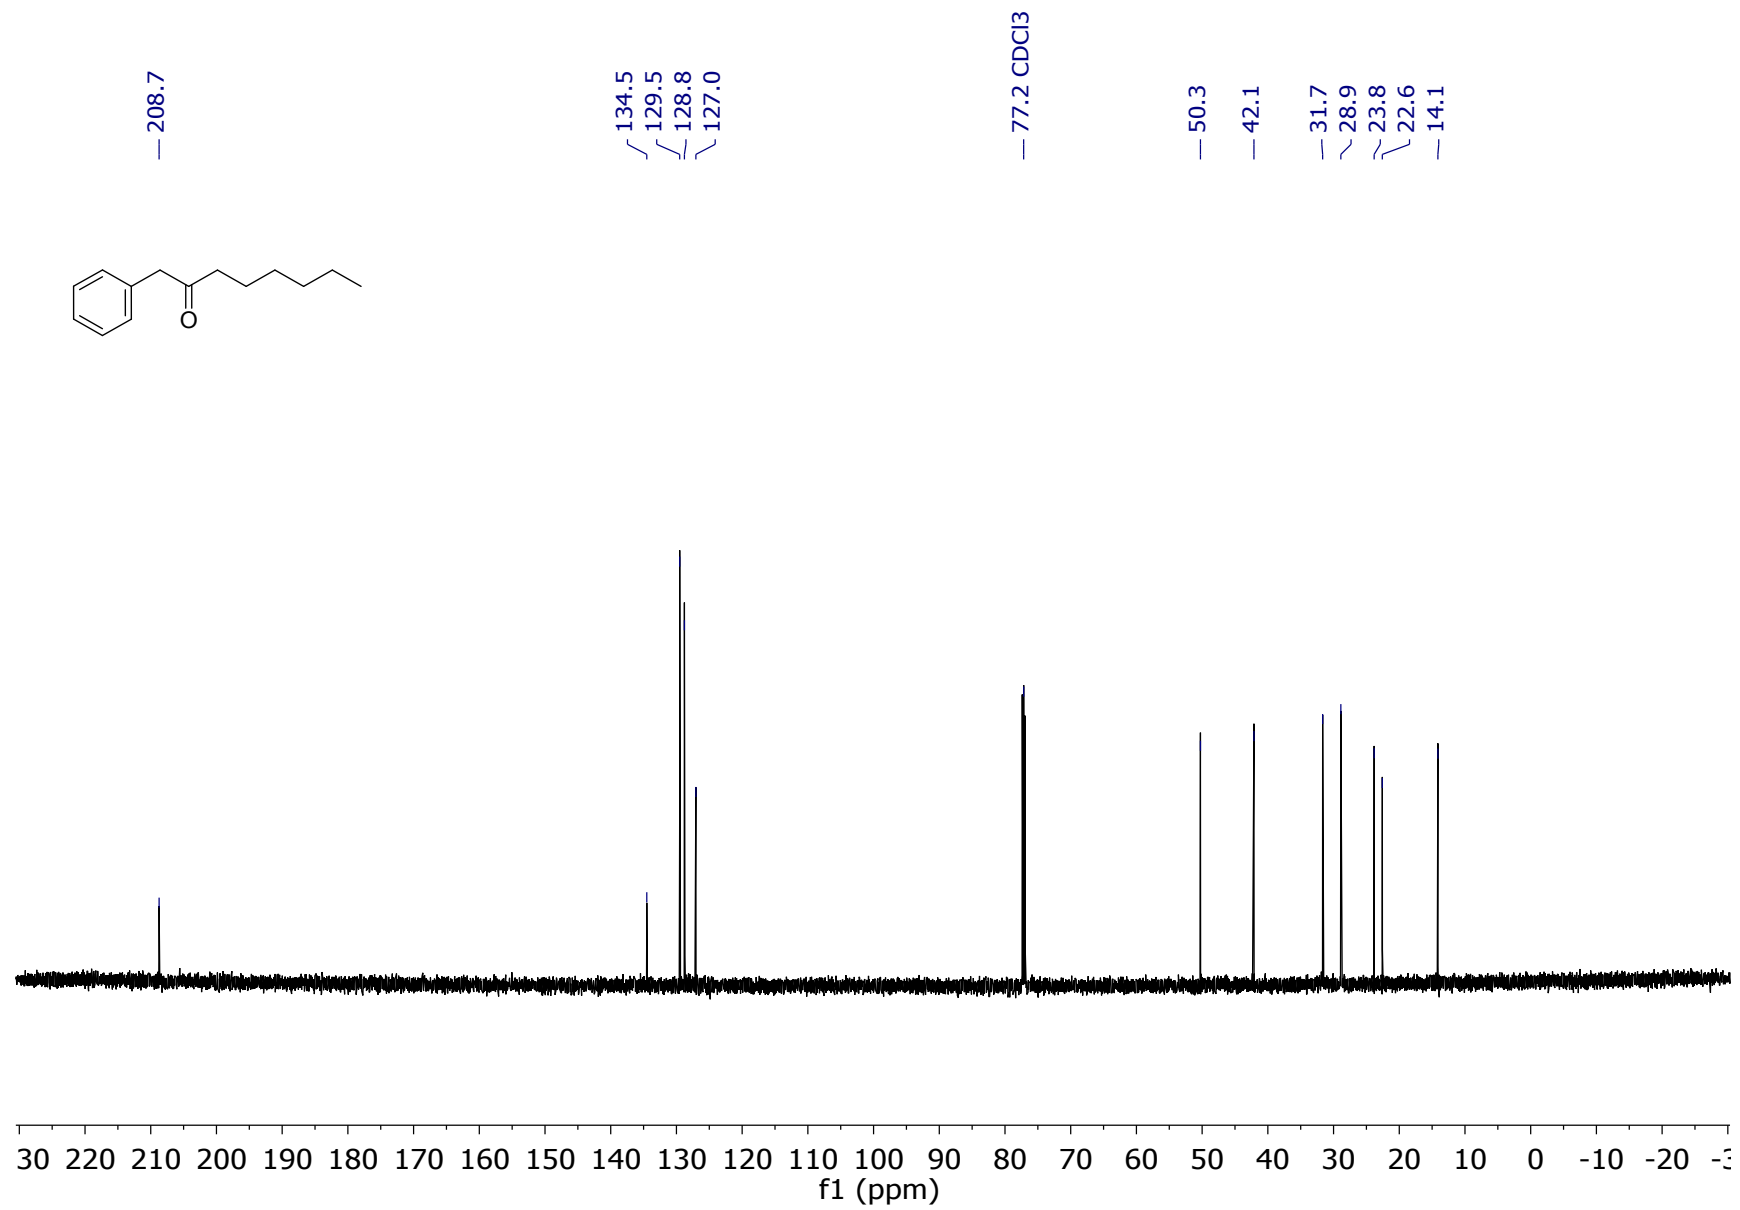

Figure S18.  $^{13}\text{C}\{^1\text{H}\}$  NMR (151 MHz, Chloroform-d) of 1-phenyloctan-2-one (9b).

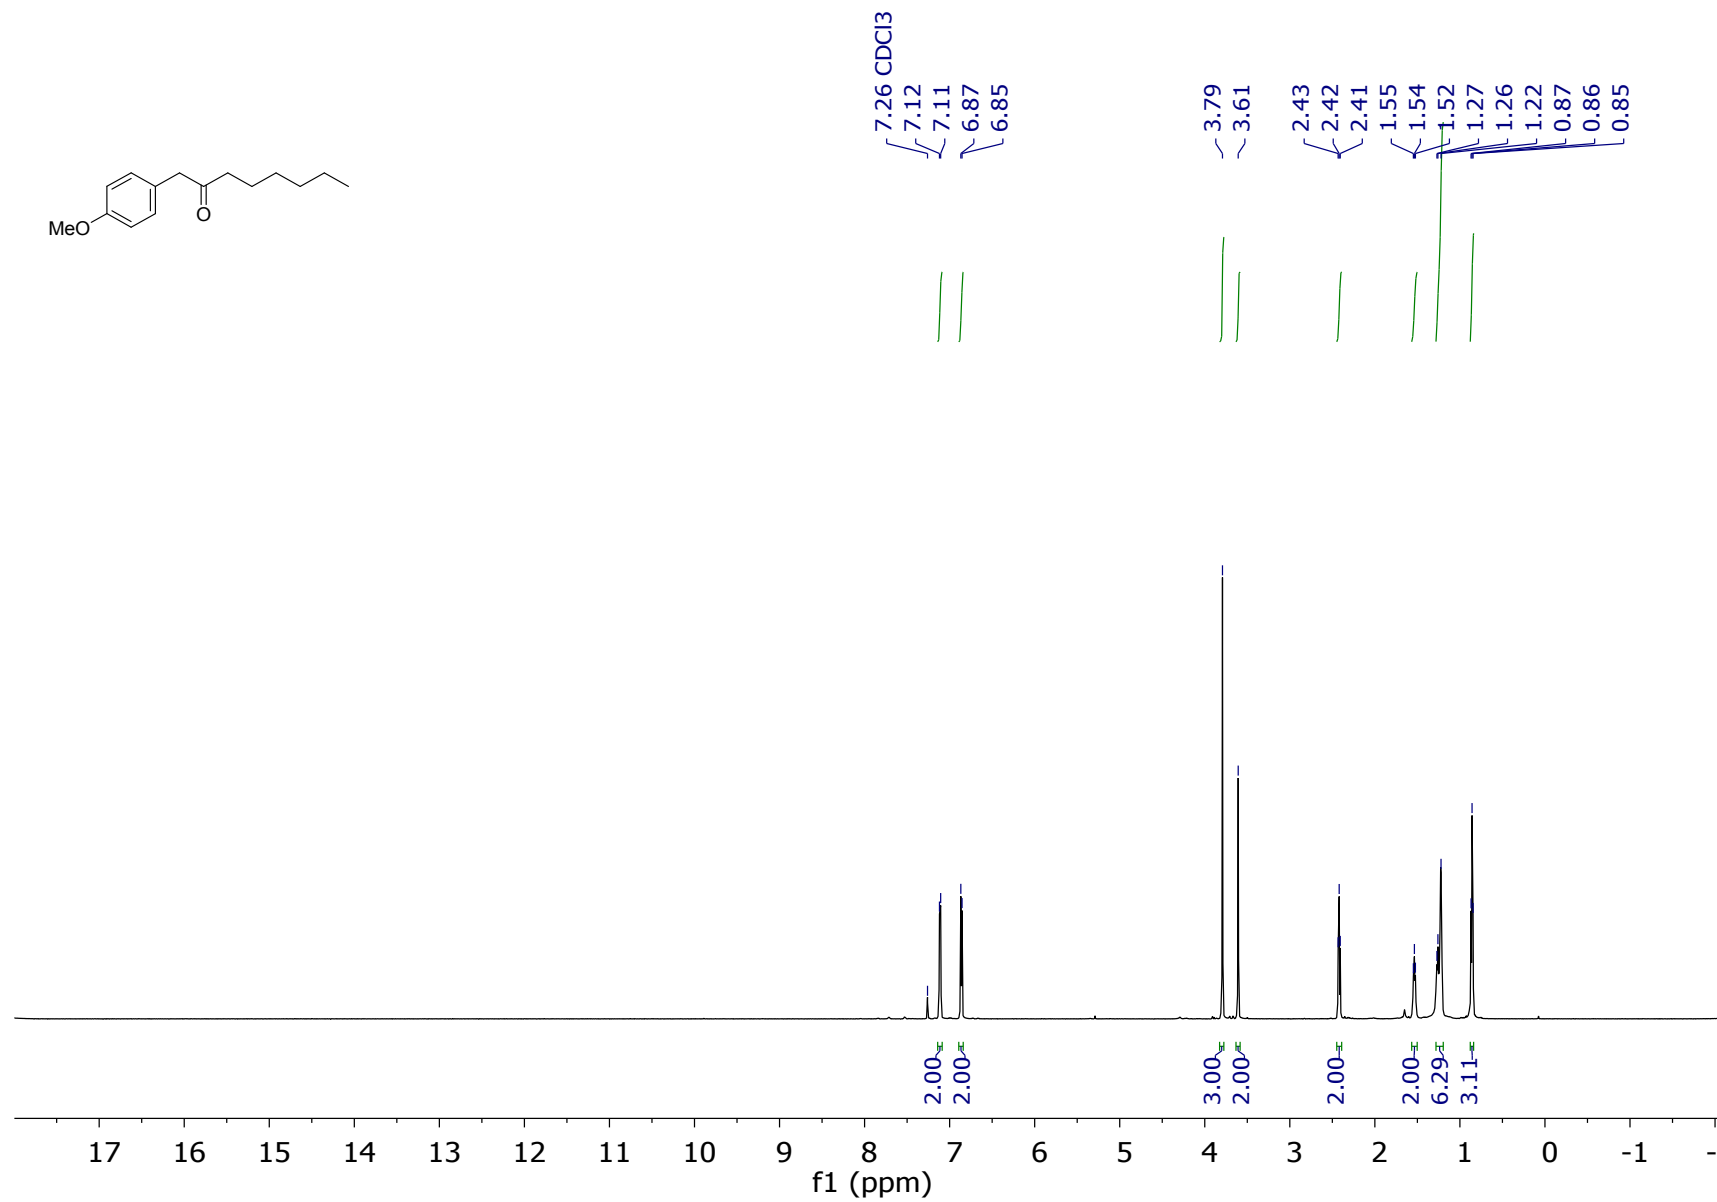

Figure S19. <sup>1</sup>H NMR (600 MHz, Chloroform-d) of 1-(4-methoxyphenyl)octan-2-one (10b).

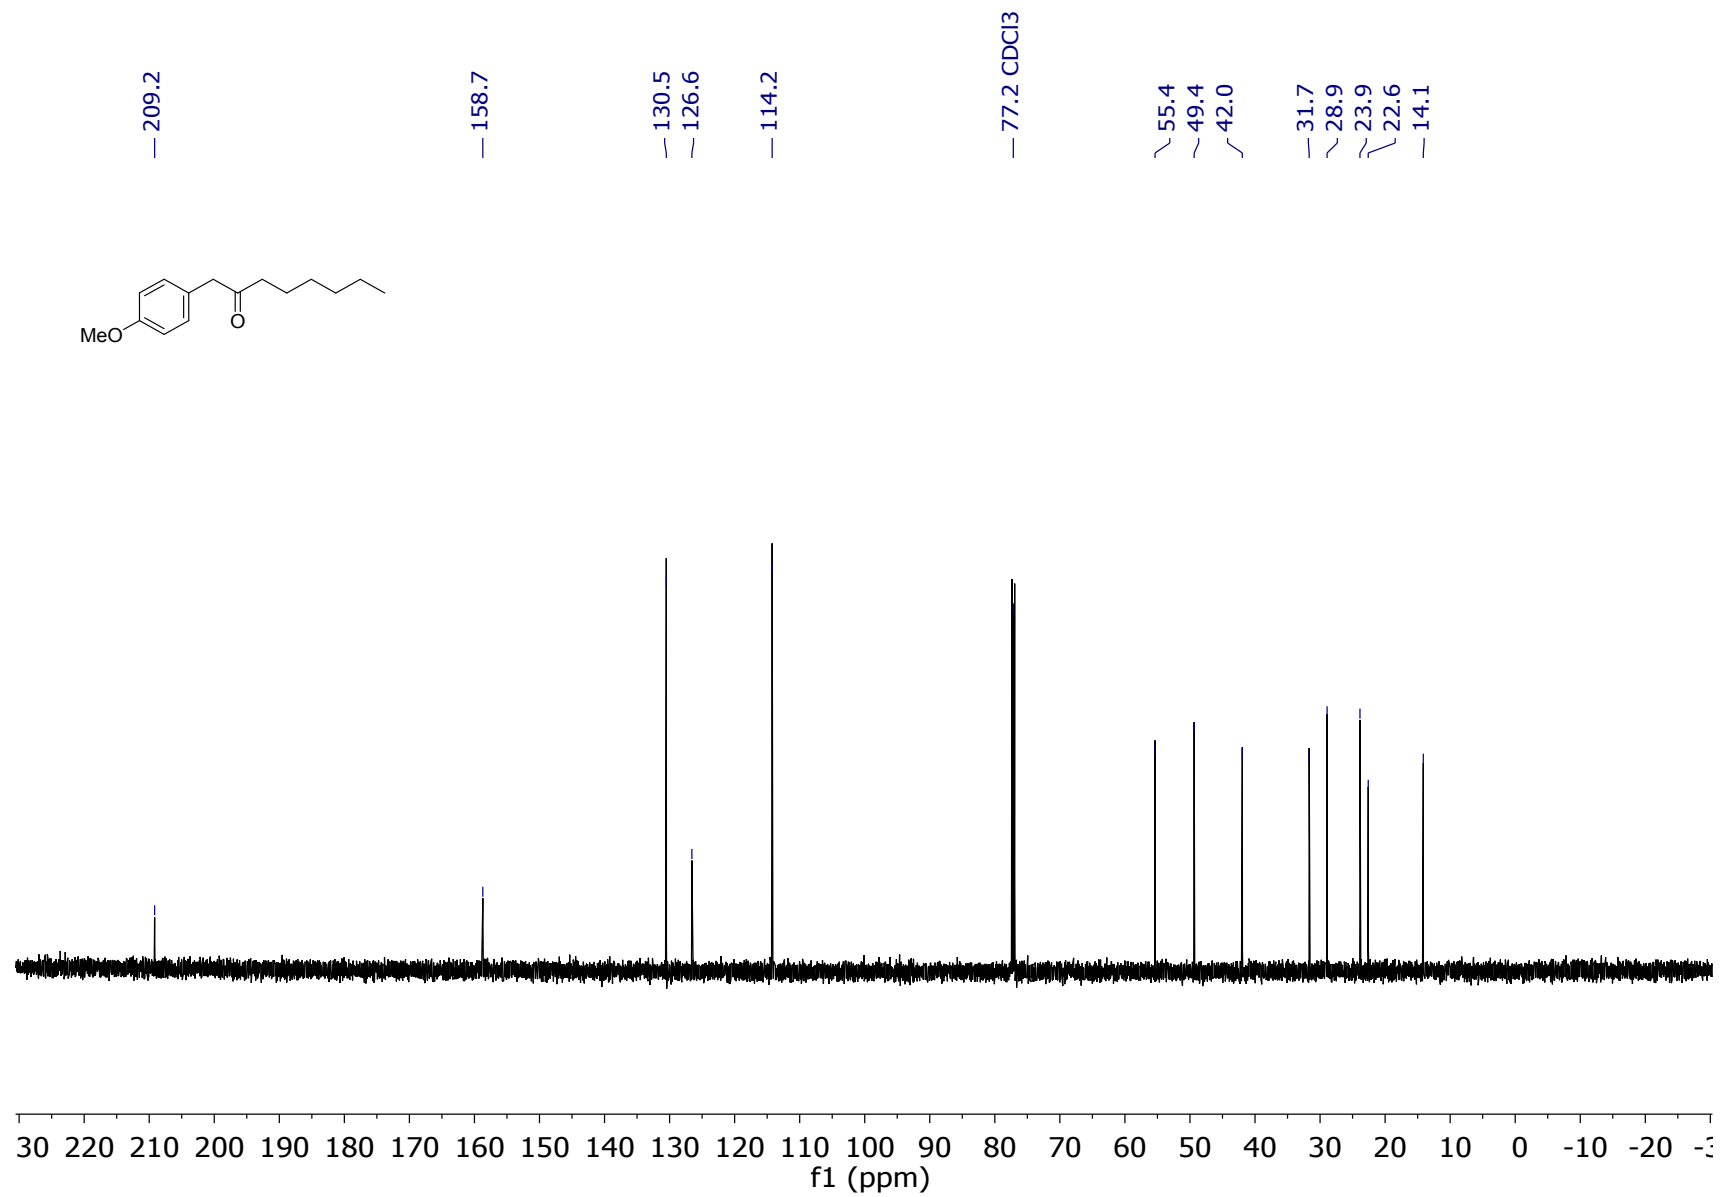

Figure S20.  $^{13}\text{C}\{^1\text{H}\}$  NMR (151 MHz, Chloroform-d) of 1-(4-methoxyphenyl)octan-2-one (10b).

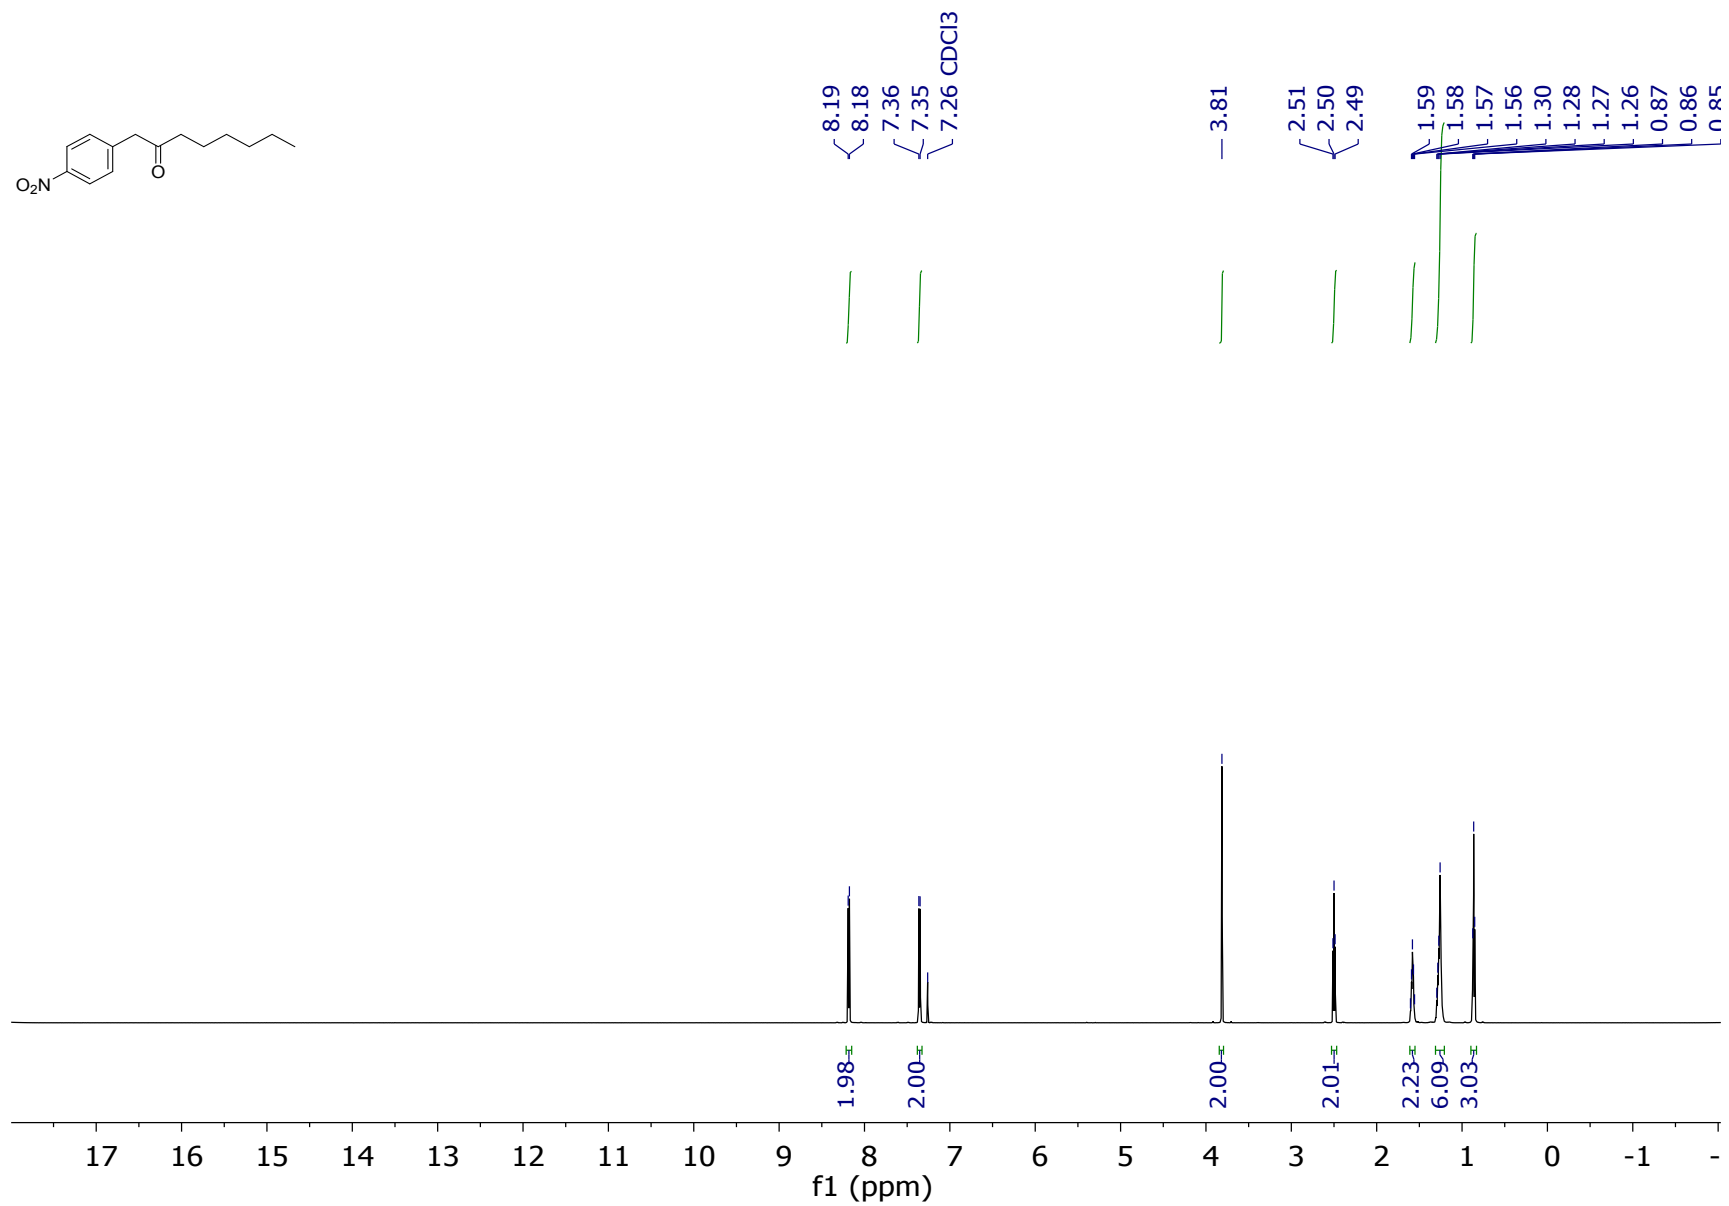

Figure S21. <sup>1</sup>H NMR (600 MHz, Chloroform-d) of 1-(4-nitrophenyl)octan-2-one (11b).

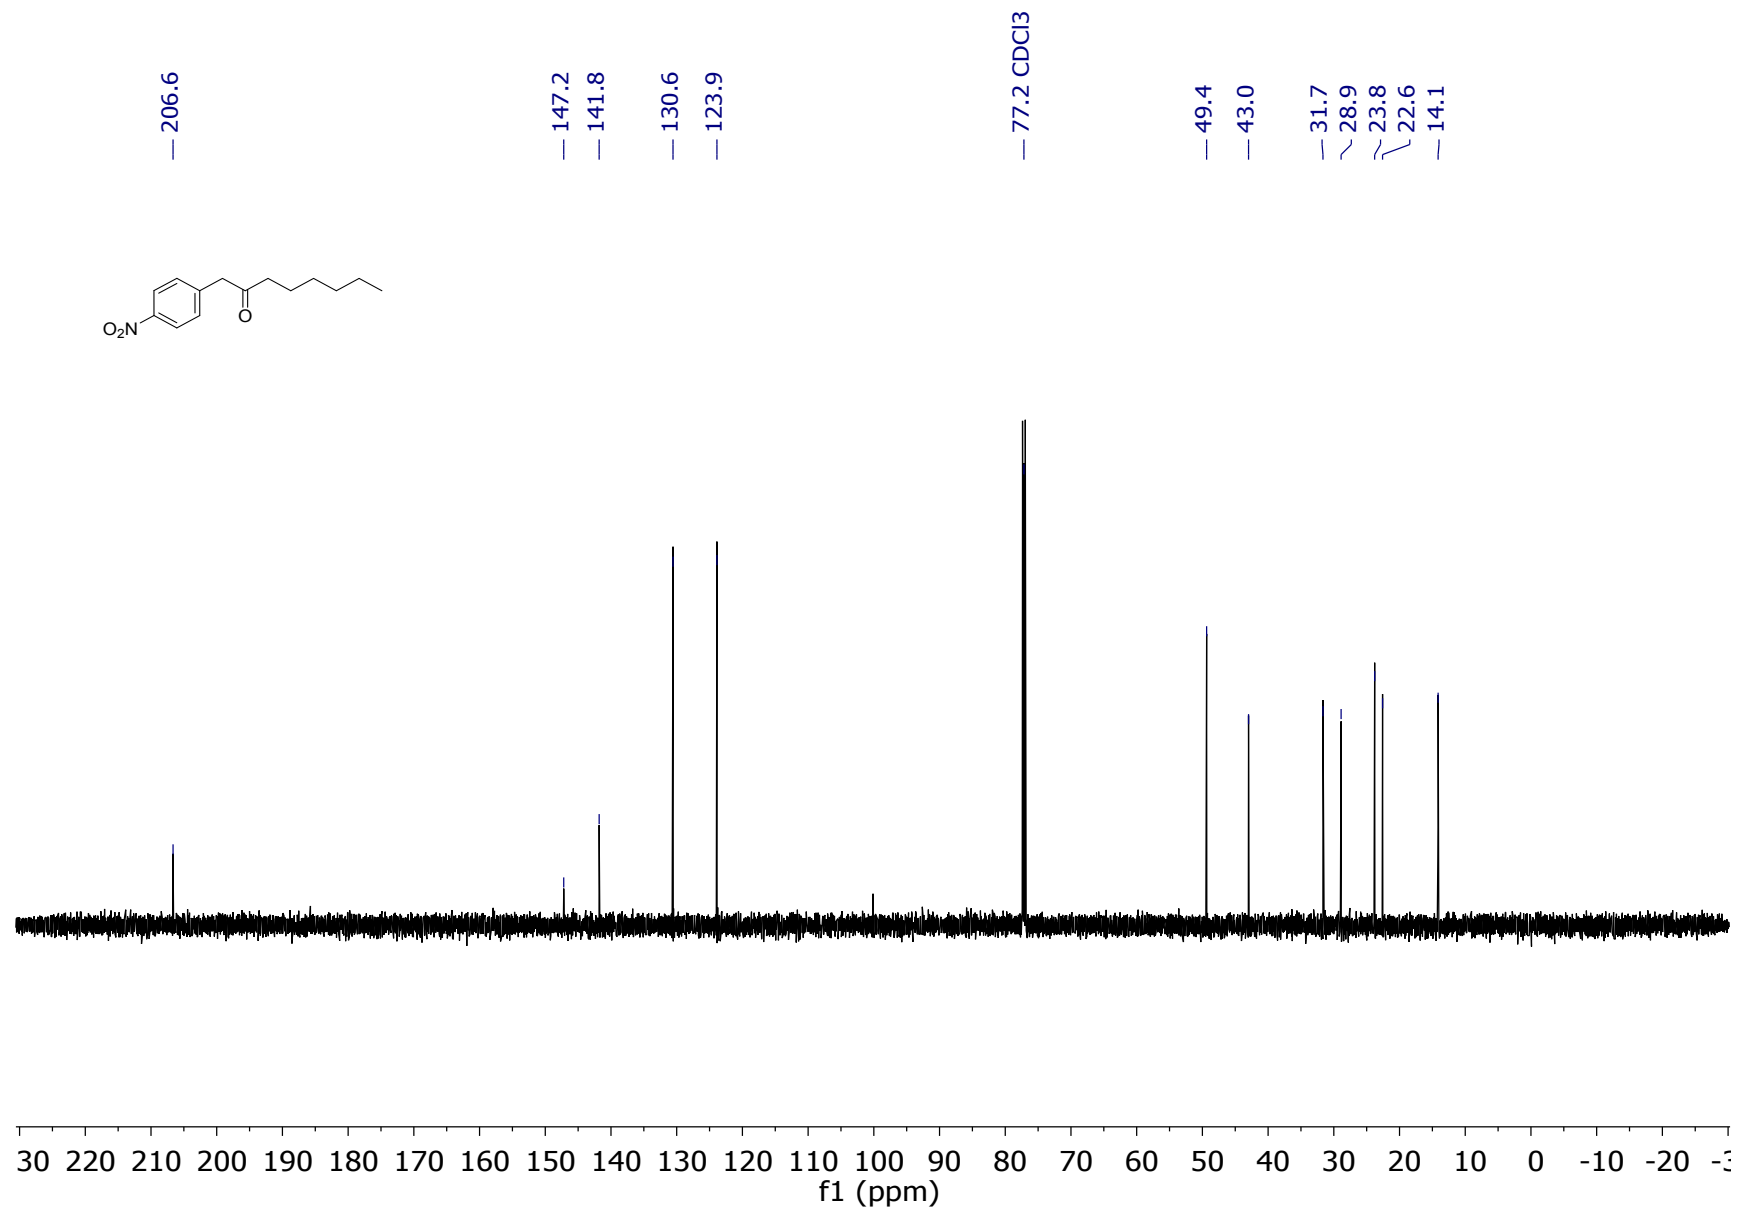

Figure S22.  $^{13}\text{C}\{^1\text{H}\}$  NMR (151 MHz, Chloroform-d) of 1-(4-nitrophenyl)octan-2-one (11b).



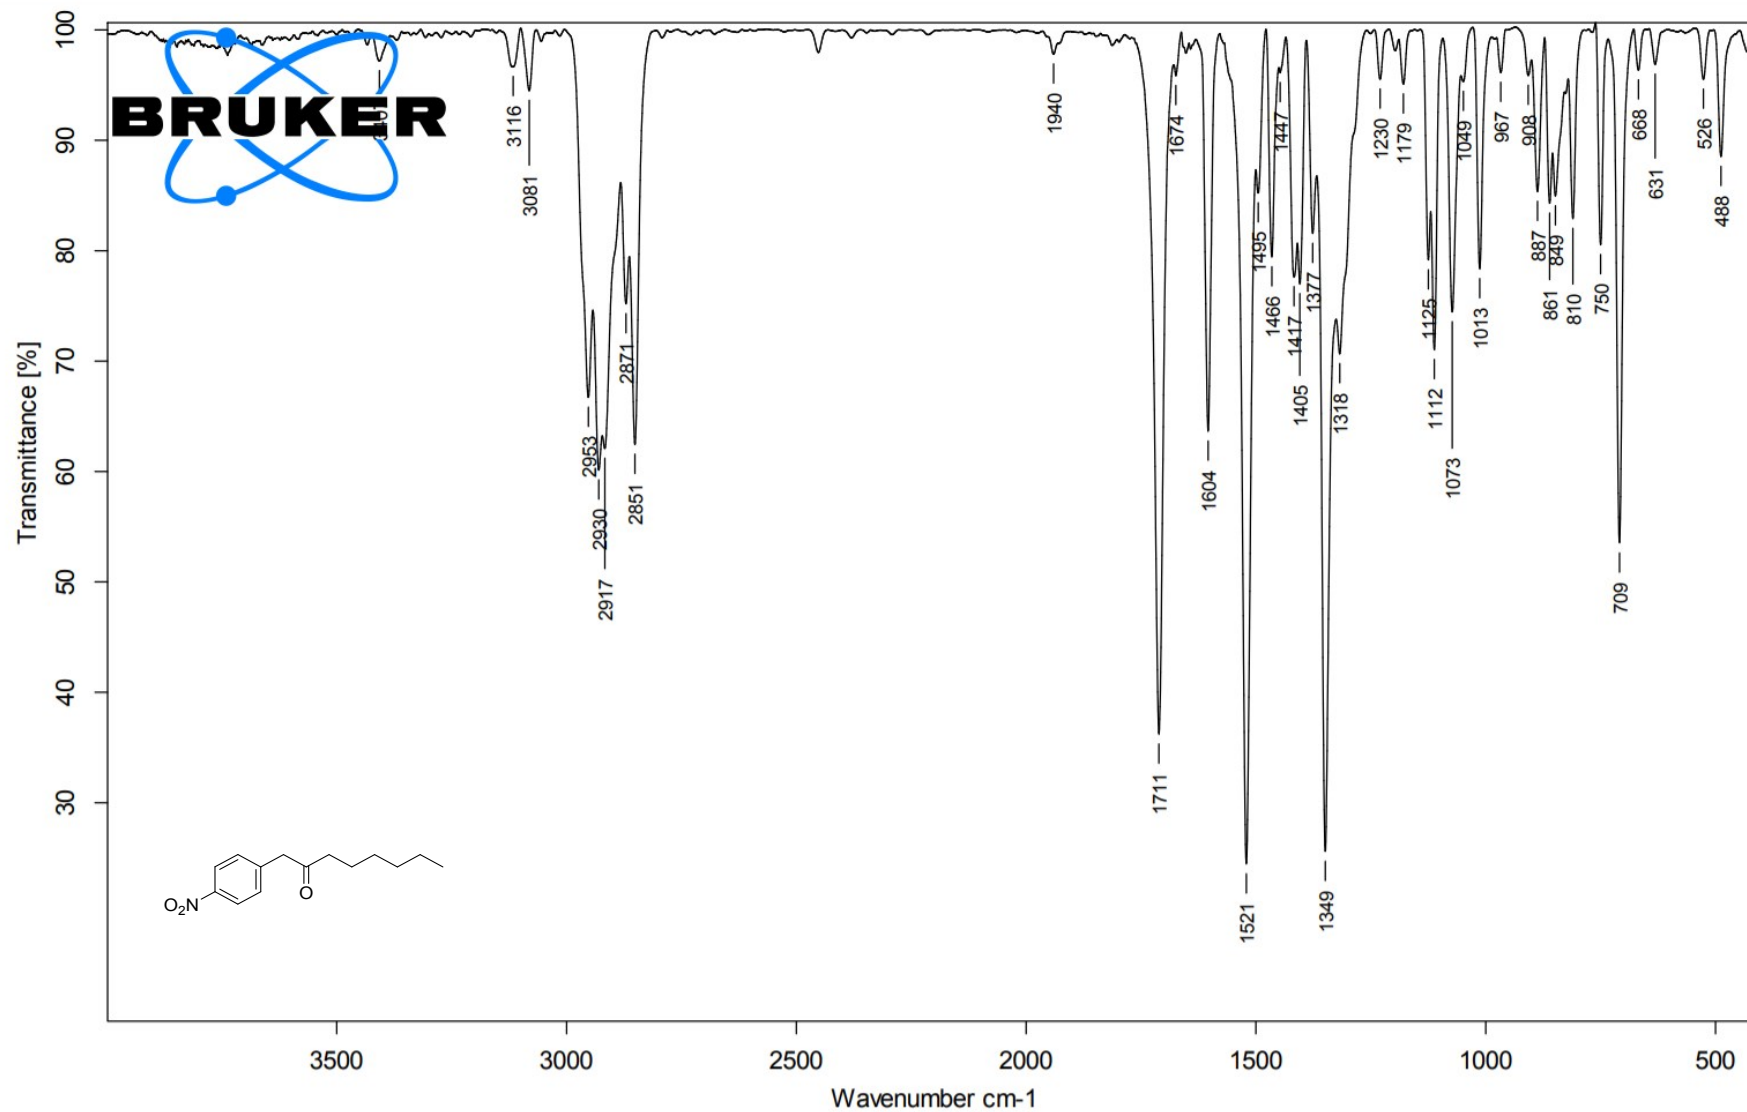

Figure S23. FT-IR spectra of 1-(4-nitrophenyl)octan-2-one (11b).

-TOF MS: 1.5720 to 1.8790 min from Sample 7 (RS-875-neg) of 28\_01\_20.wiff  
a=7.01844468338754440e-004, t0=-3.11000636120297710e-002 (Photospray)

Max. 4.3e5 cps.

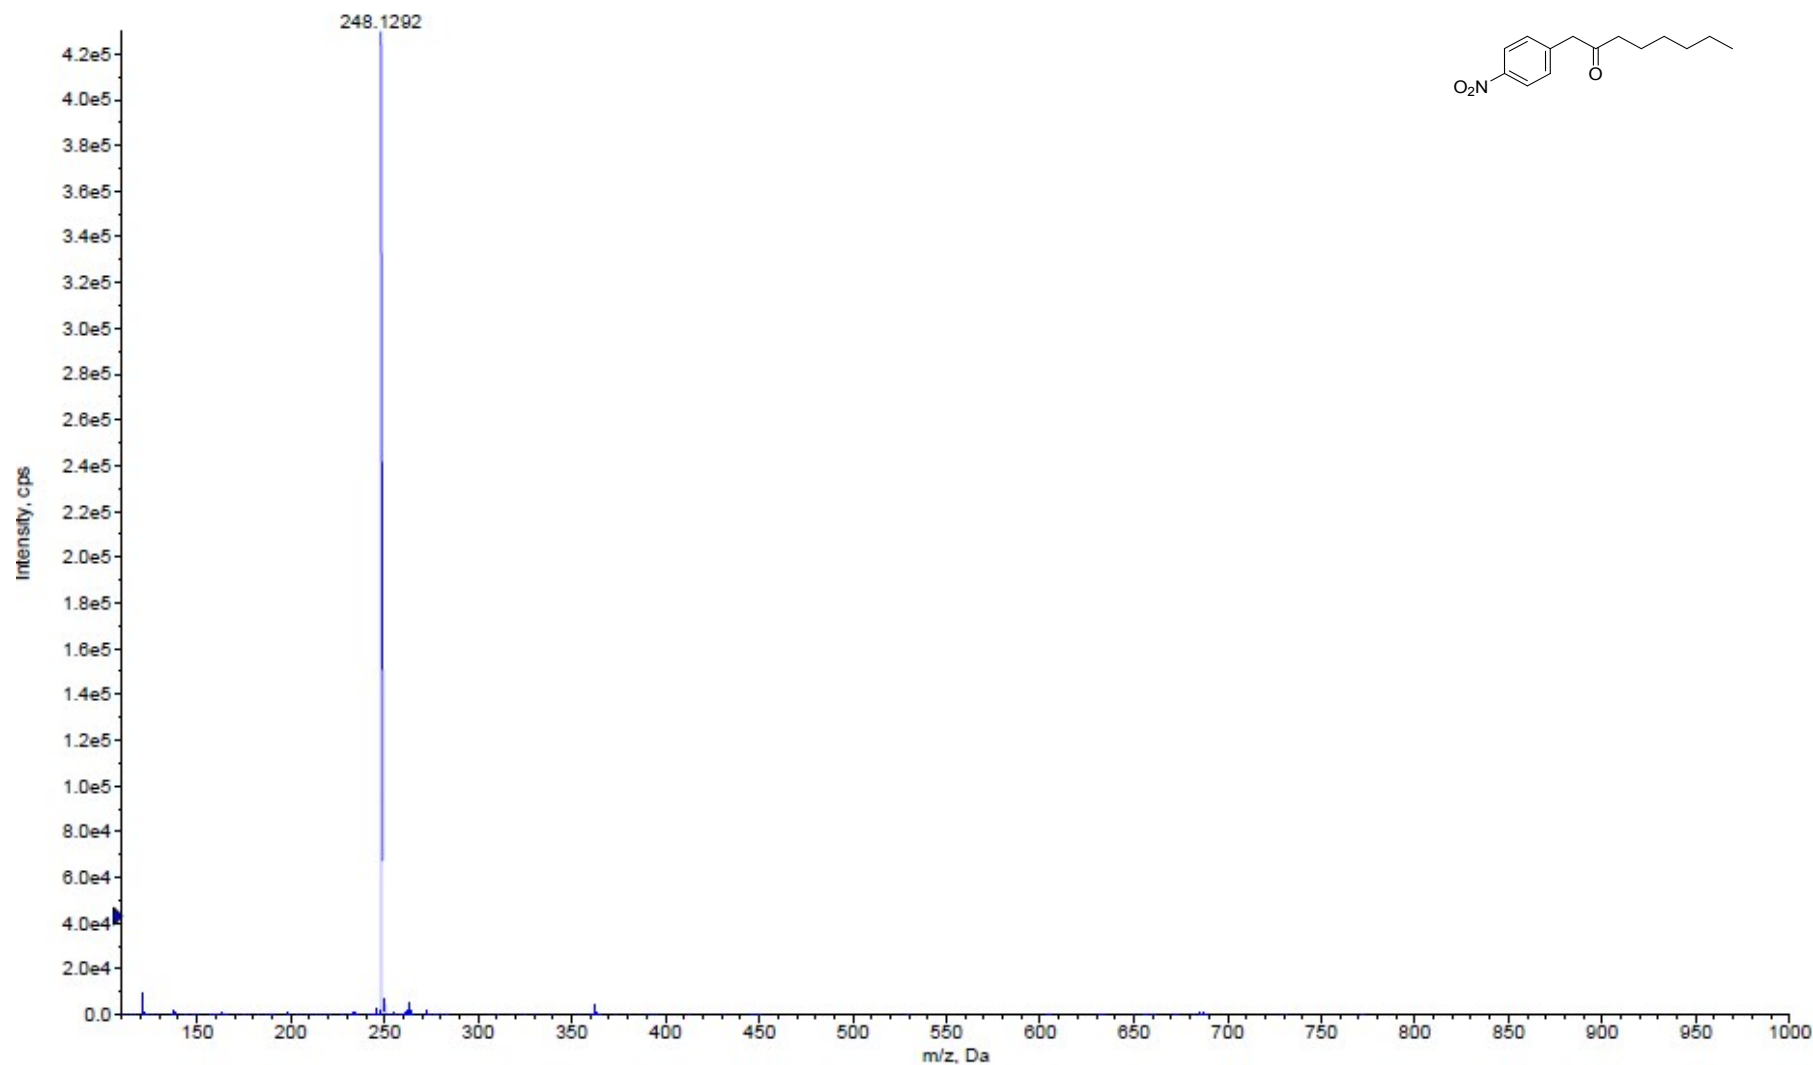

Figure S24. HRMS spectra of 1-(4-nitrophenyl)octan-2-one (11b).

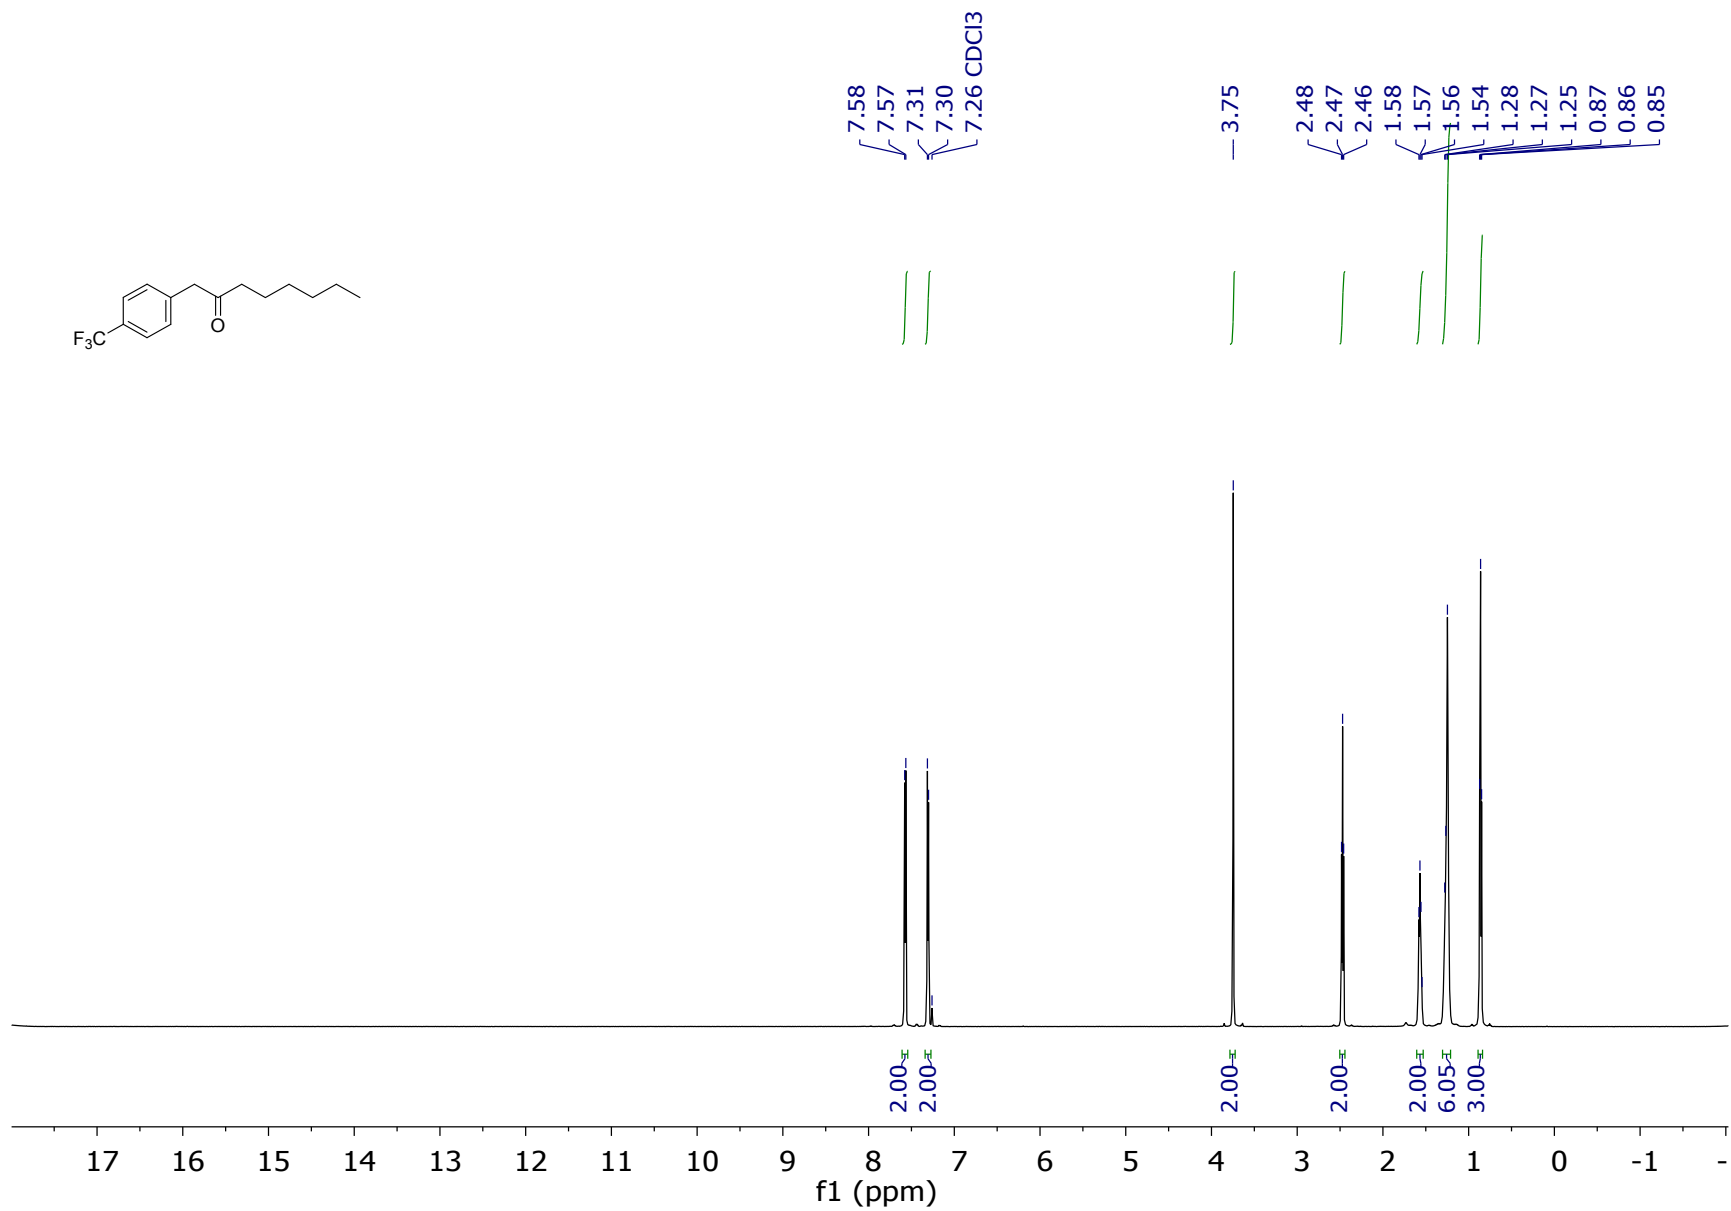

Figure S25. <sup>1</sup>H NMR (600 MHz, Chloroform-d) of 1-(4-(trifluoromethyl)phenyl)octan-2-one (12b).

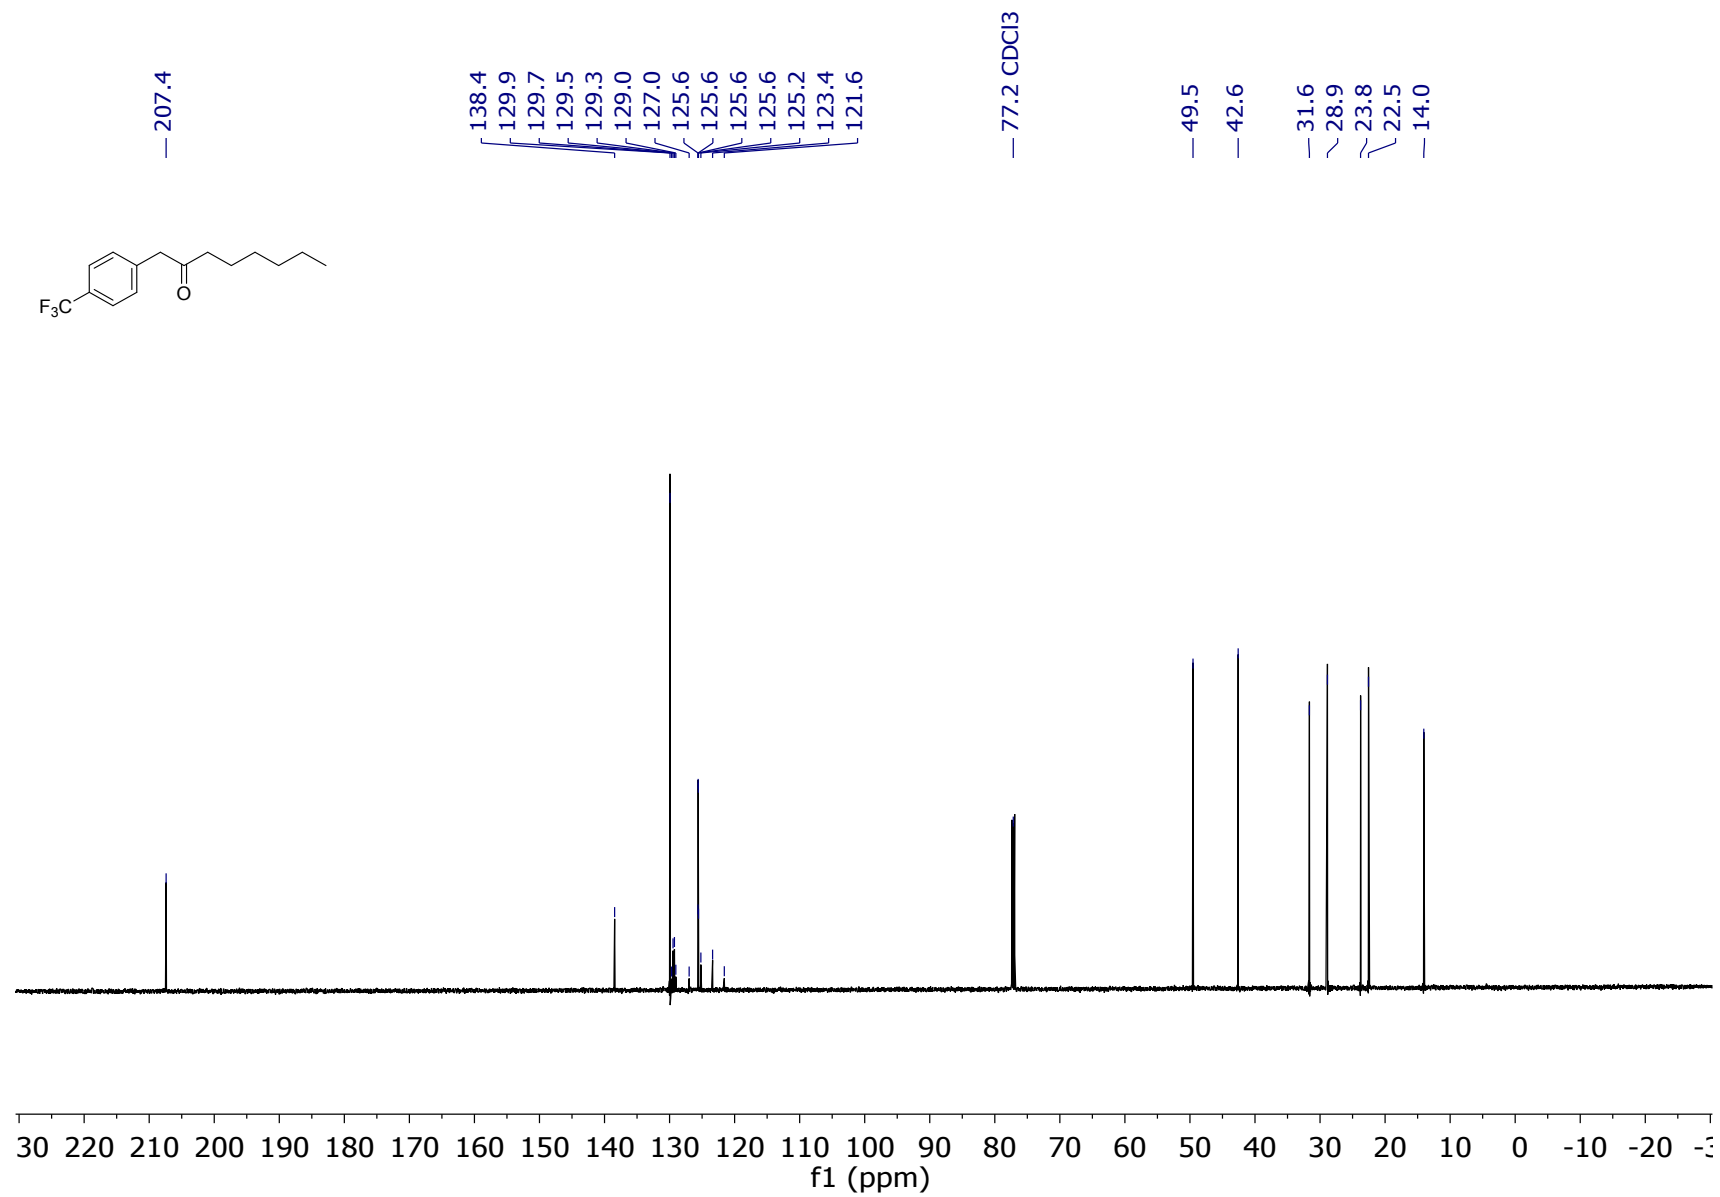

Figure S26.  $^{13}\text{C}\{^1\text{H}\}$  NMR (151 MHz, Chloroform-d) of 1-(4-(trifluoromethyl)phenyl)octan-2-one (12b).

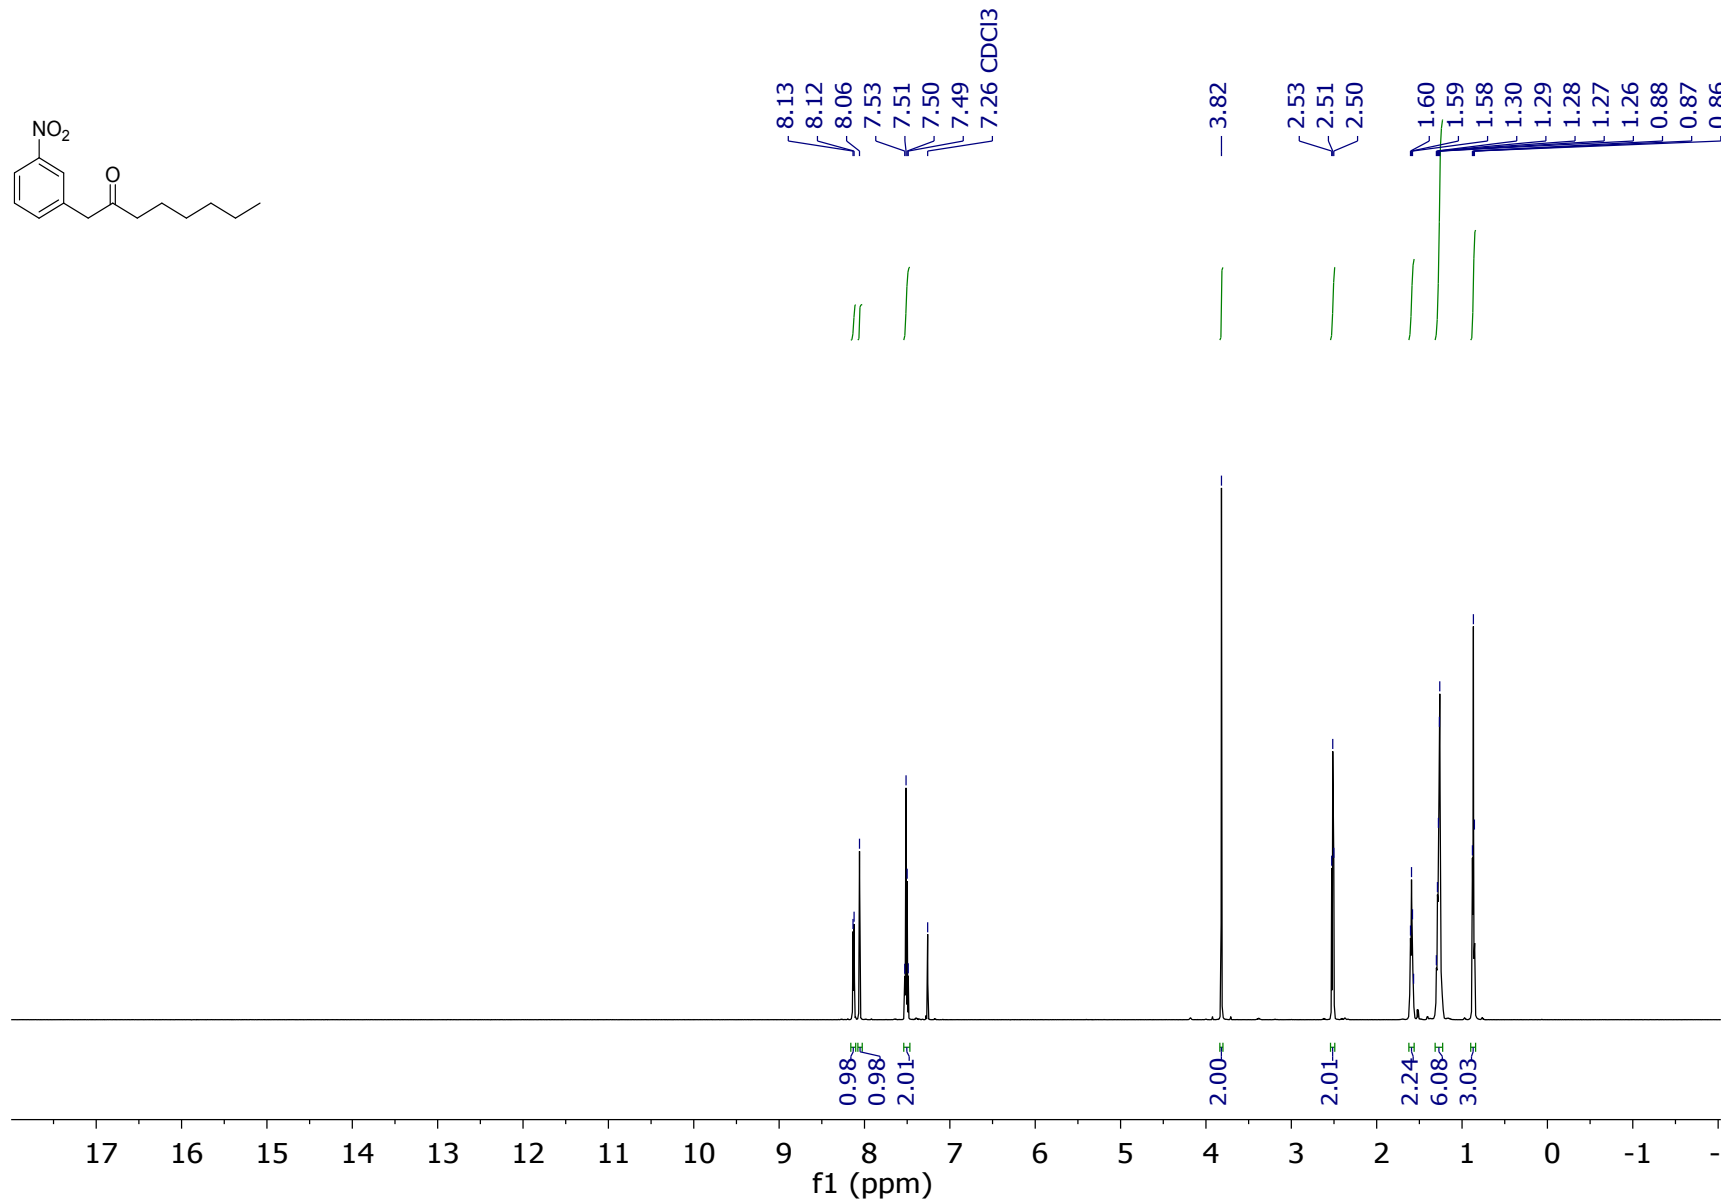

Figure S27. <sup>1</sup>H NMR (600 MHz, Chloroform-d) of 1-(3-nitrophenyl)octan-2-one (13b).

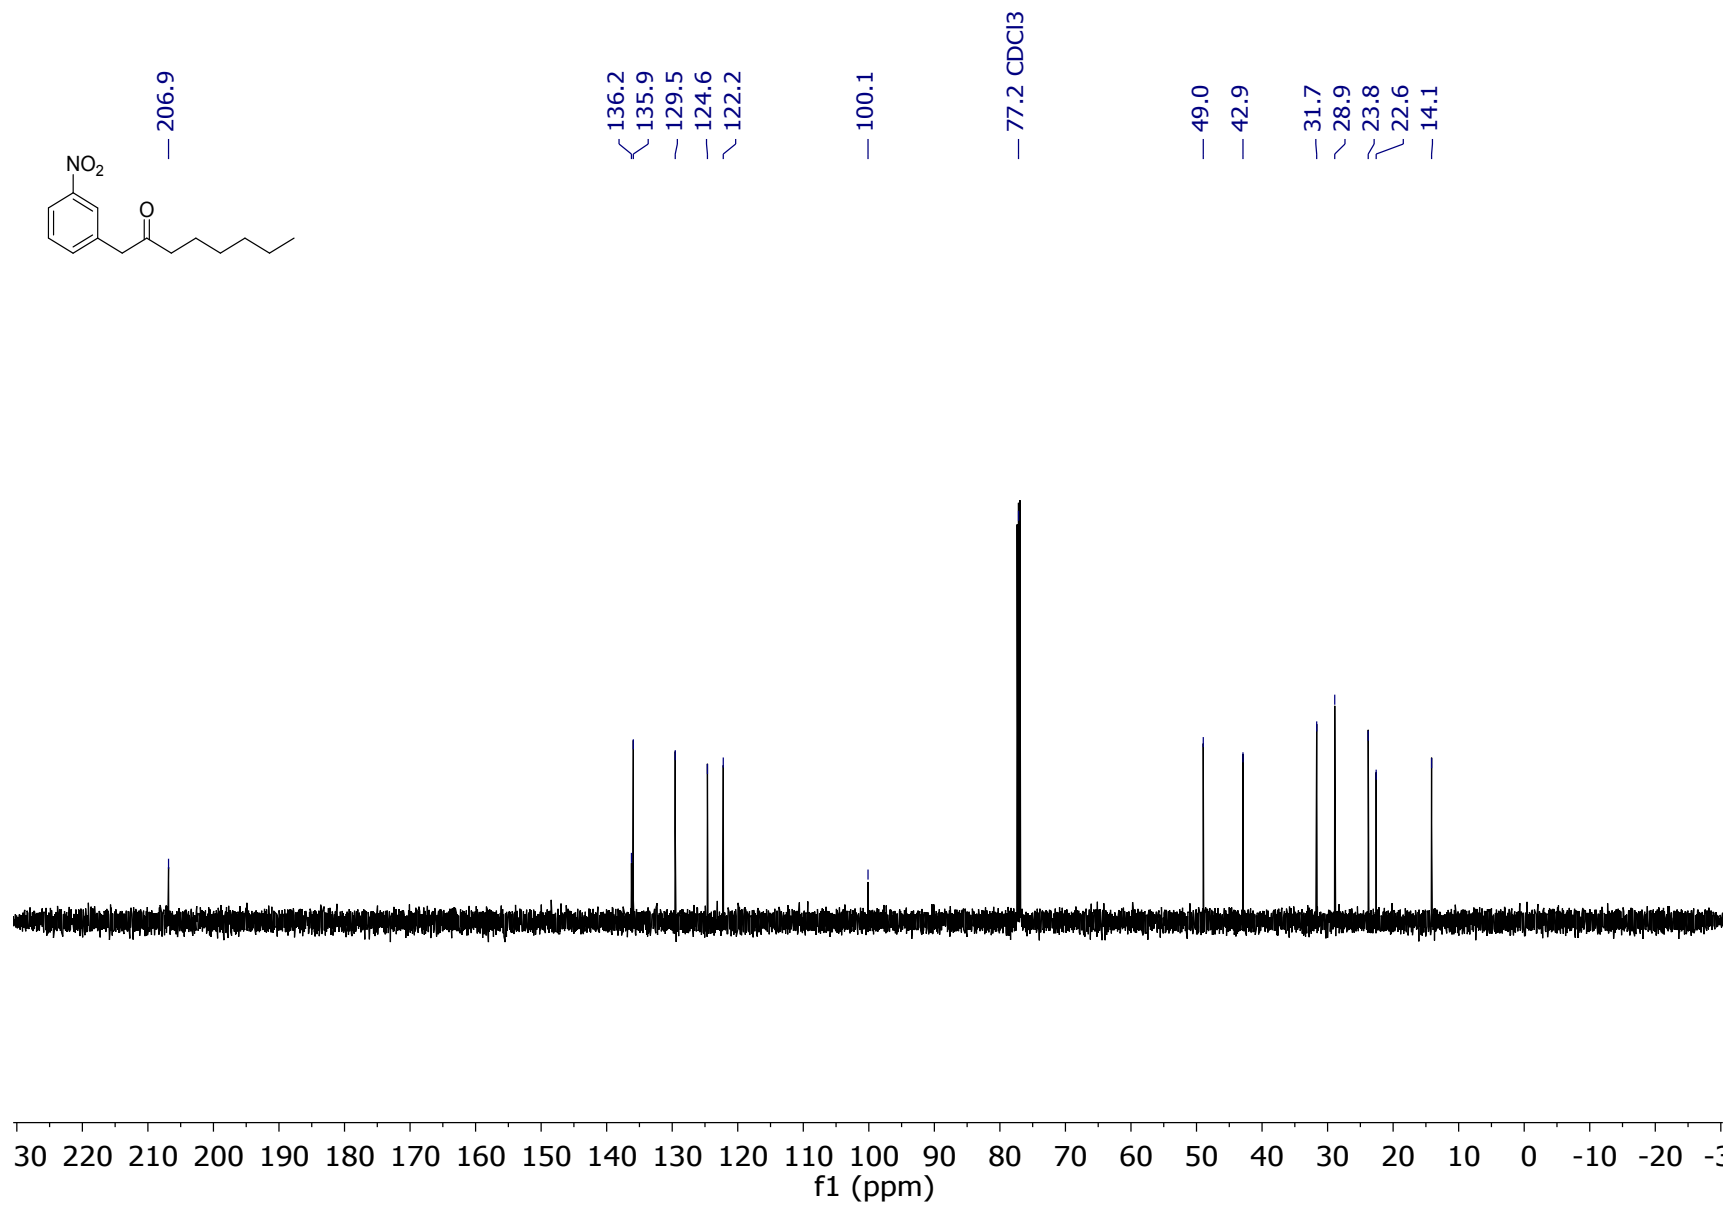

Figure S28.  $^{13}\text{C}\{^1\text{H}\}$  NMR (151 MHz, Chloroform-d) of 1-(3-nitrophenyl)octan-2-one (13b).

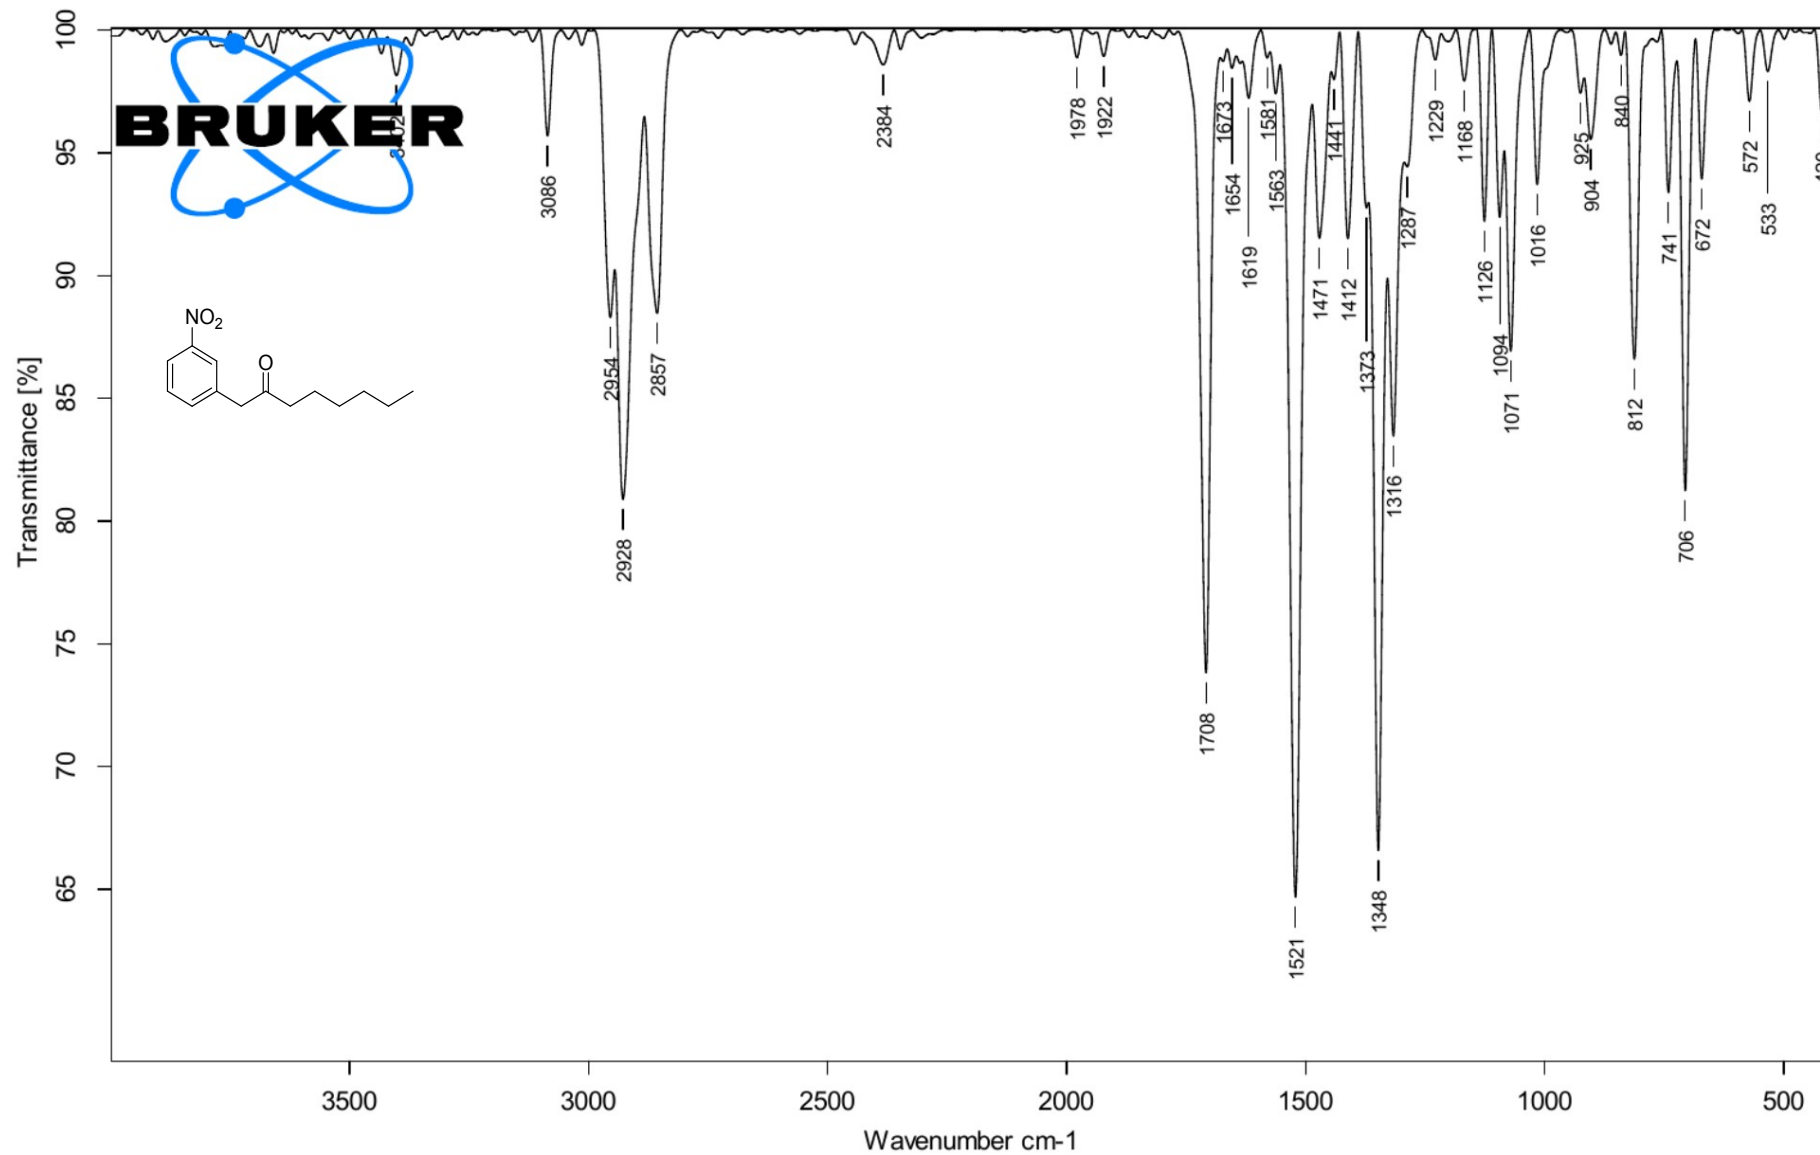

re S29. FT-IR spectra of 1-(3-nitrophenyl)octan-2-one (13b). **Fig**

-TOF MS: 0.4186 to 0.8604 min from Sample 8 (RS-876-neg) of 28\_01\_20.wiff  
a=7.01851848008602330e-004, t0=1.46880204464246640e-001 (Photospray)

Max. 3.1e4 cps.

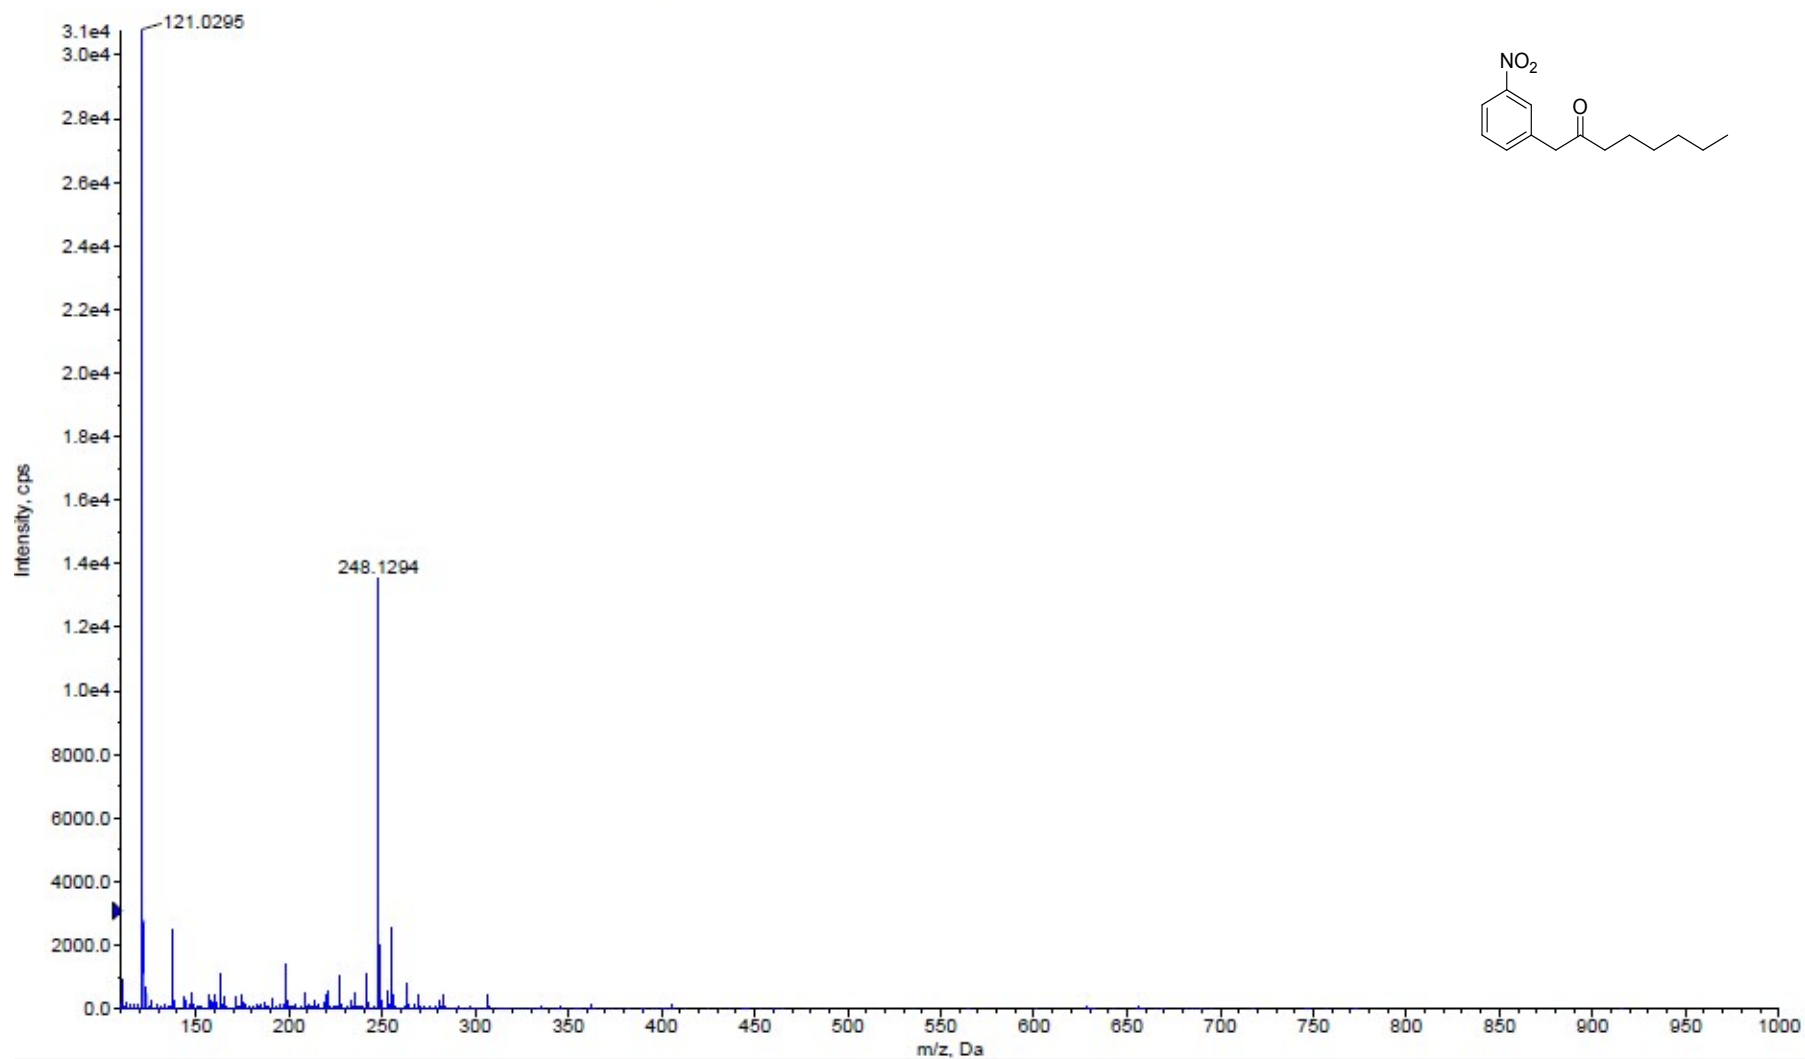

Figure S30. HRMS spectra of 1-(3-nitrophenyl)octan-2-one (13b).



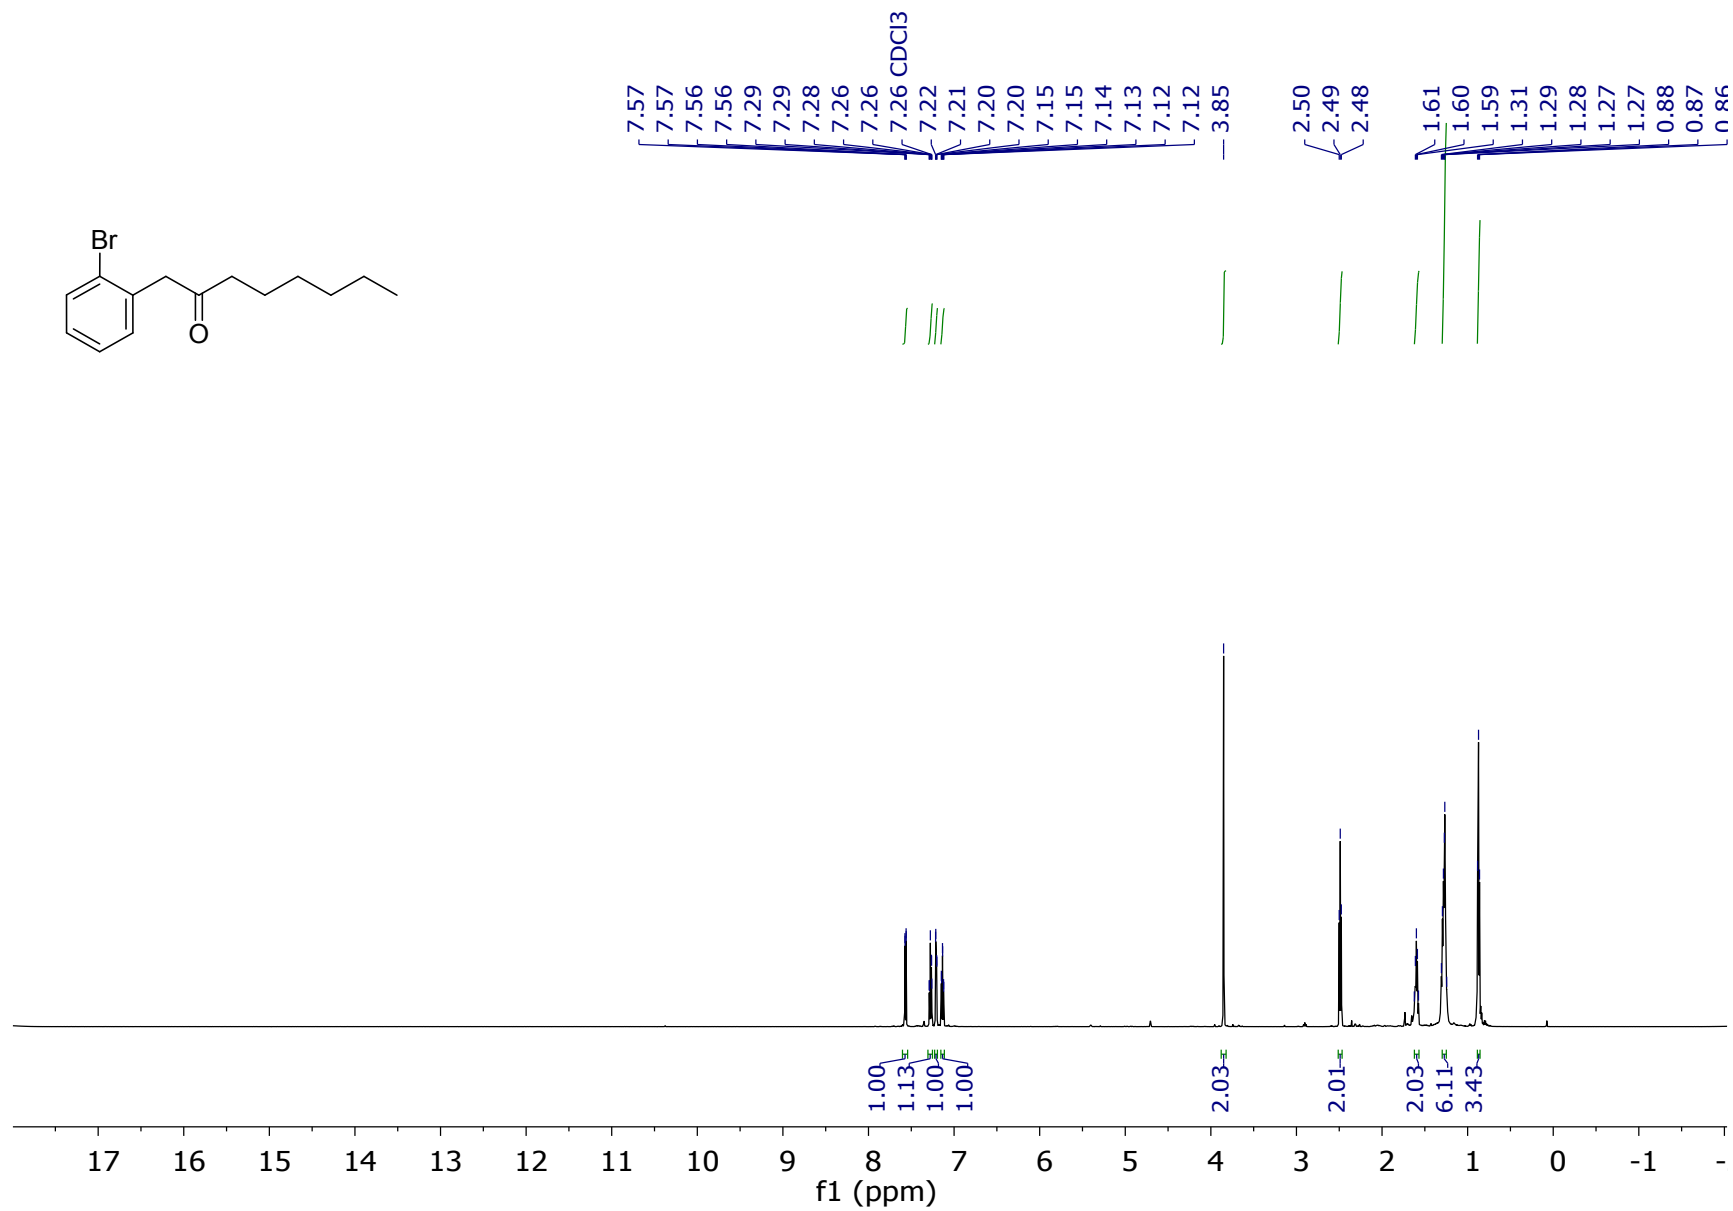

Figure S31. <sup>1</sup>H NMR (600 MHz, Chloroform-d) of 1-(2-bromophenyl)octan-2-one (14b).

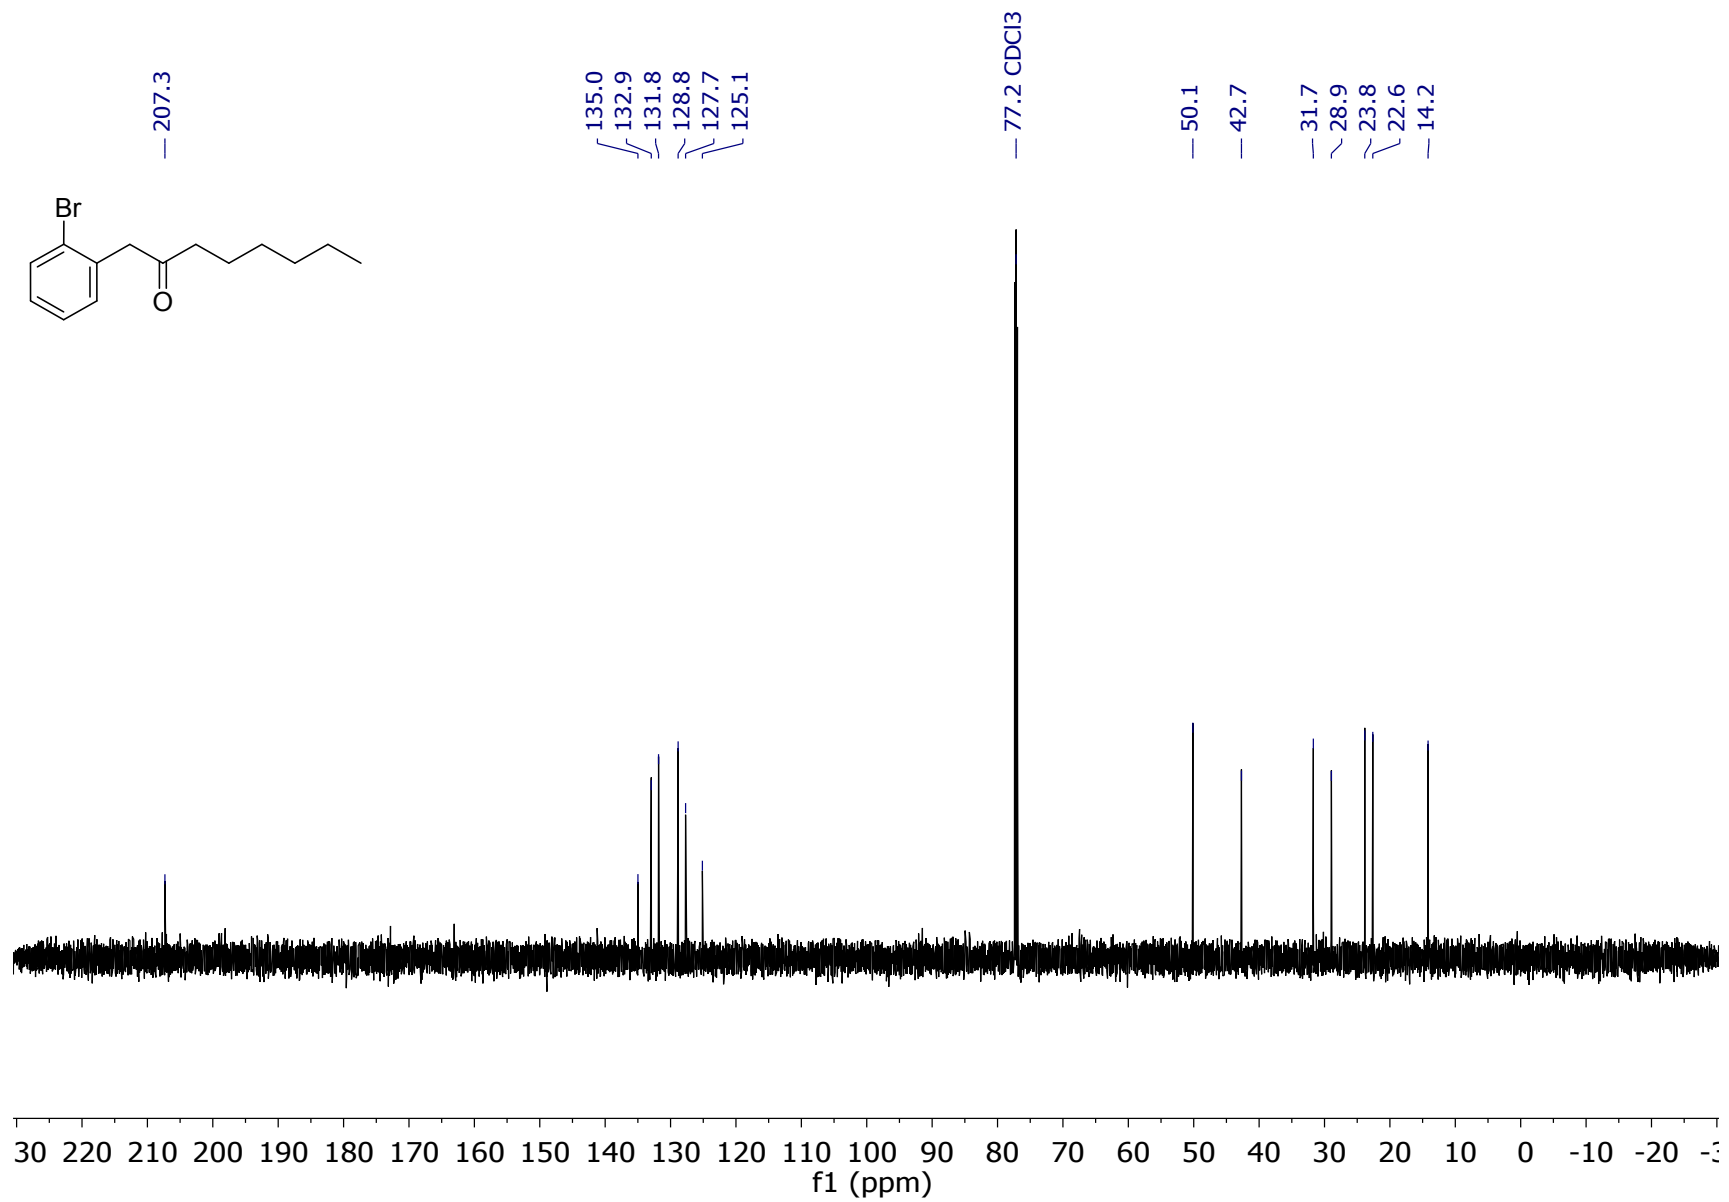

Figure S32.  $^{13}\text{C}\{^1\text{H}\}$  NMR (151 MHz, Chloroform-d) of 1-(2-bromophenyl)octan-2-one (14b).

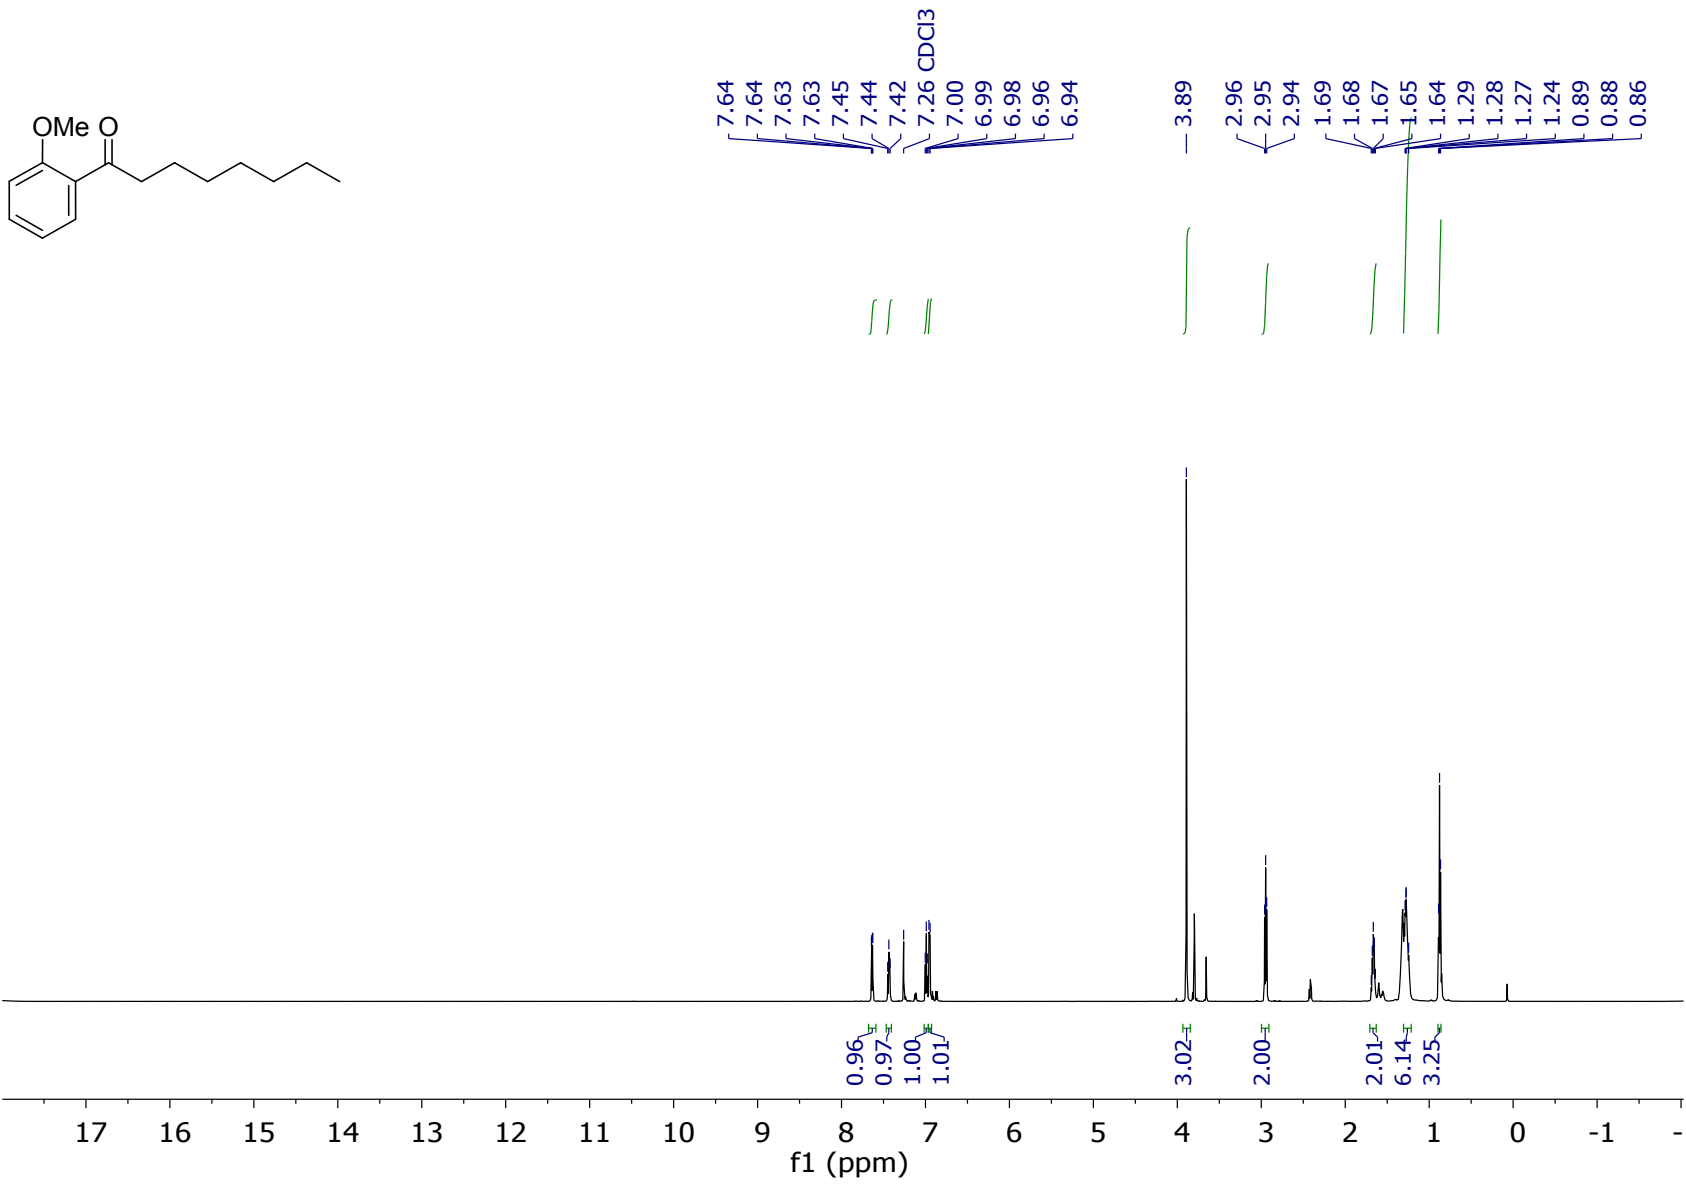

Figure S36. <sup>1</sup>H NMR (600 MHz, Chloroform-d) of 1-(2-methoxyphenyl)octan-1-one (15a).

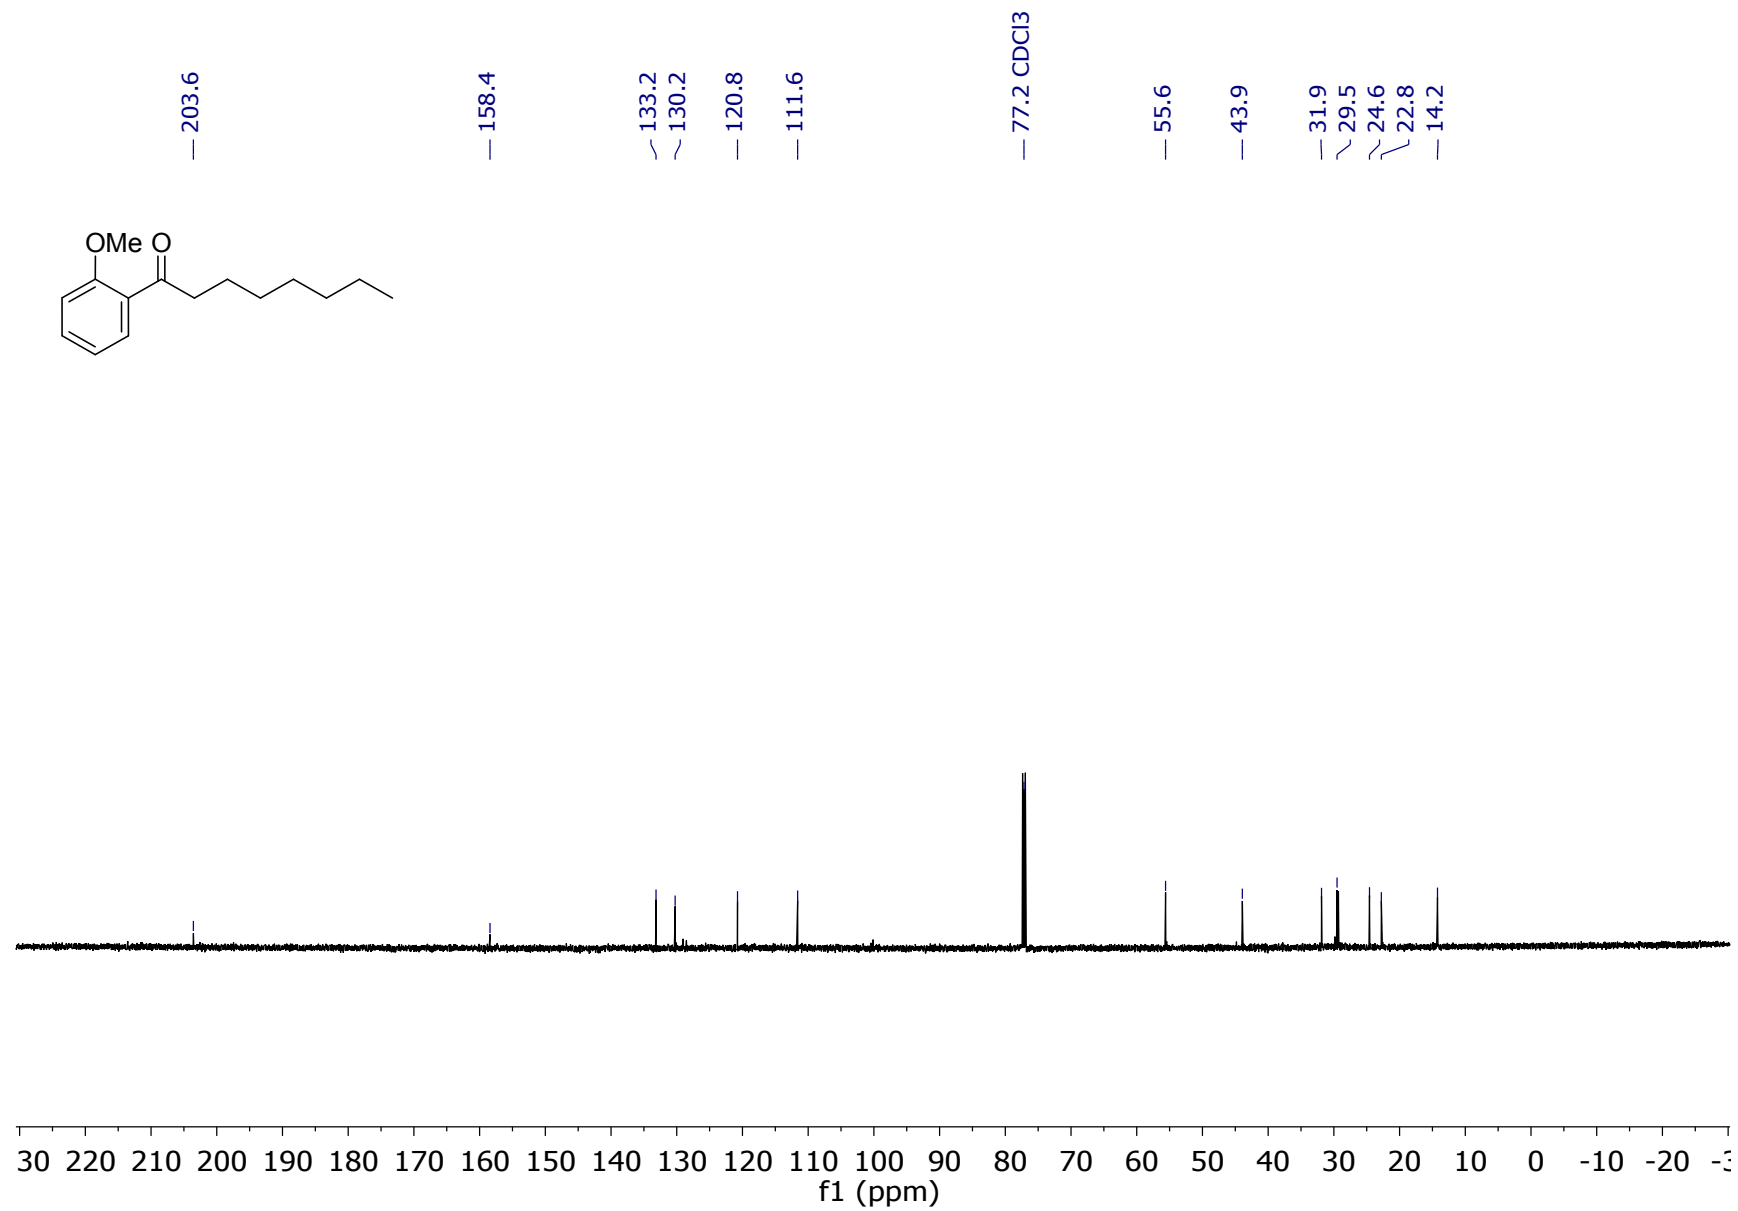

Figure S37.  $^{13}\text{C}\{^1\text{H}\}$  NMR (151 MHz, Chloroform-d) of 1-(2-methoxyphenyl)octan-1-one (15a).

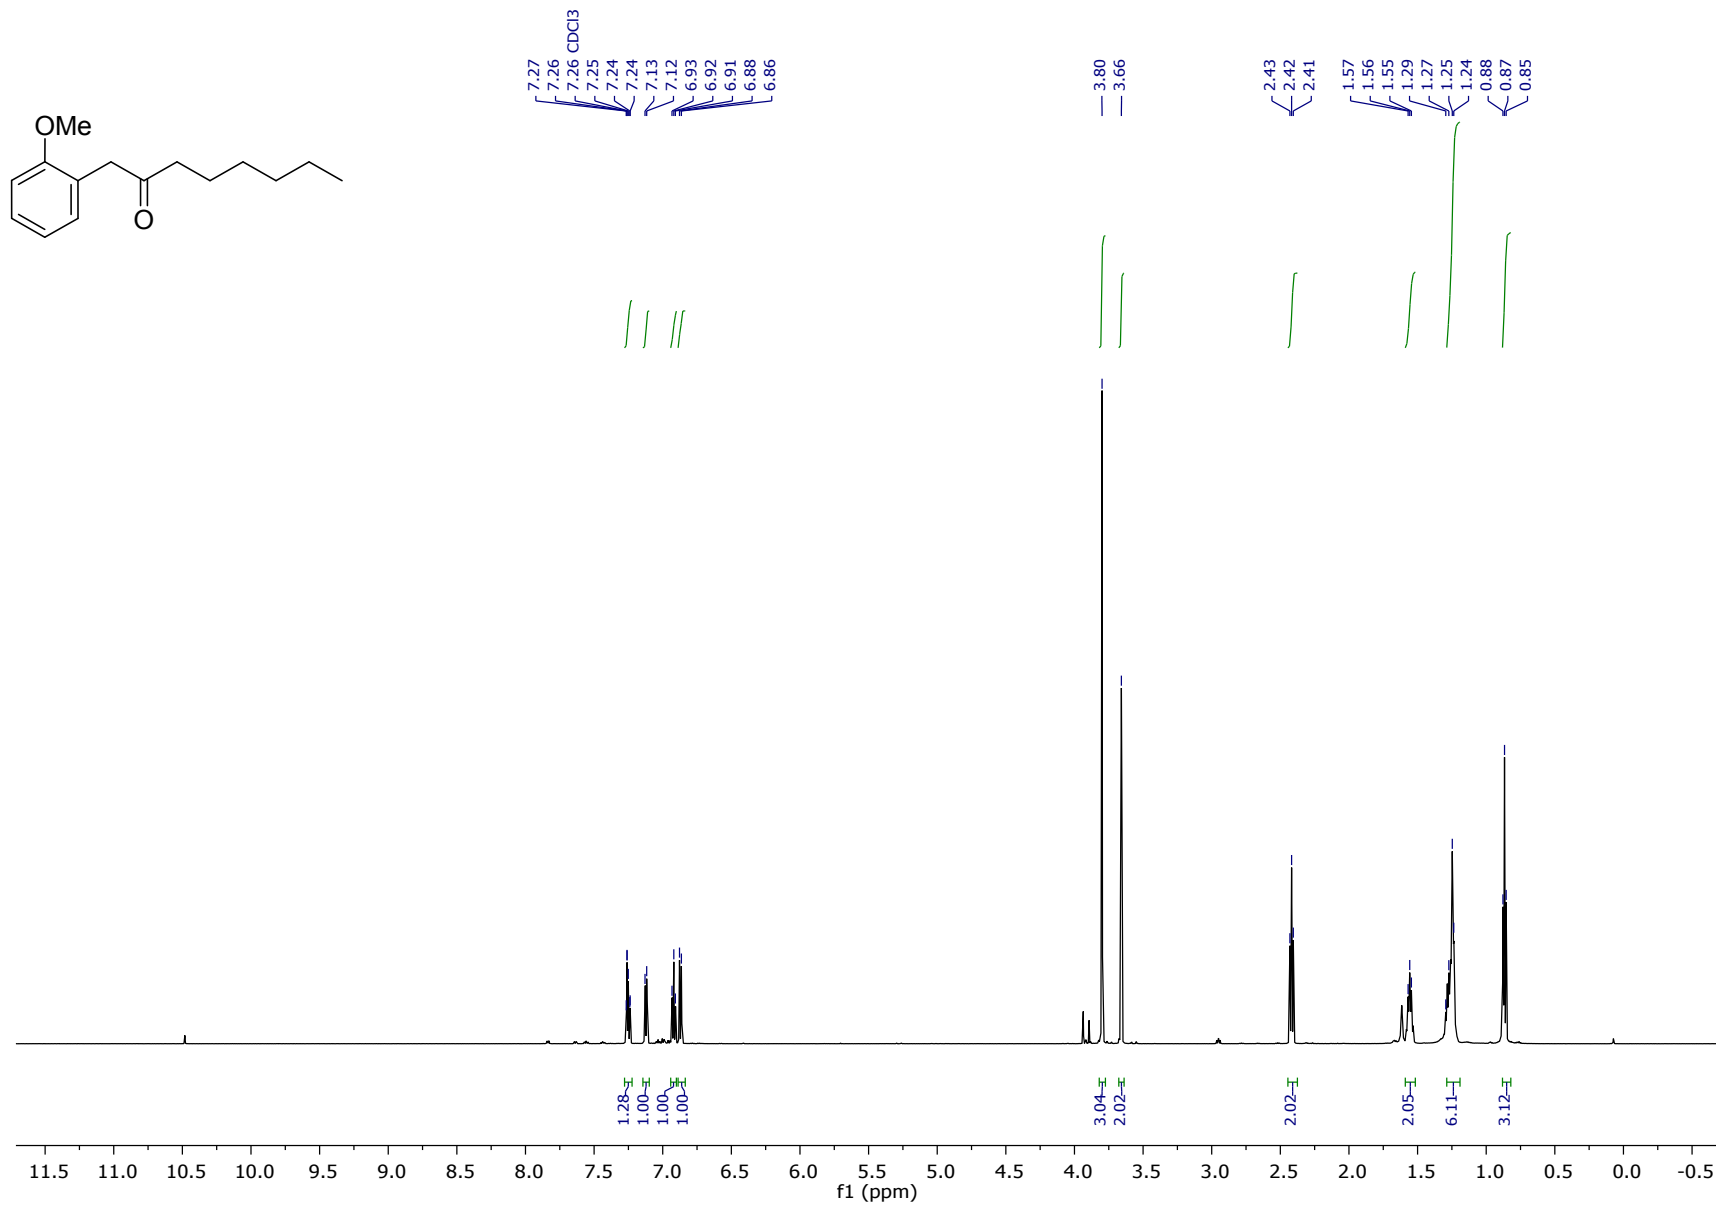

Figure S33. <sup>1</sup>H NMR (600 MHz, Chloroform-d) of 1-(2-methoxyphenyl)octan-2-one (15b).

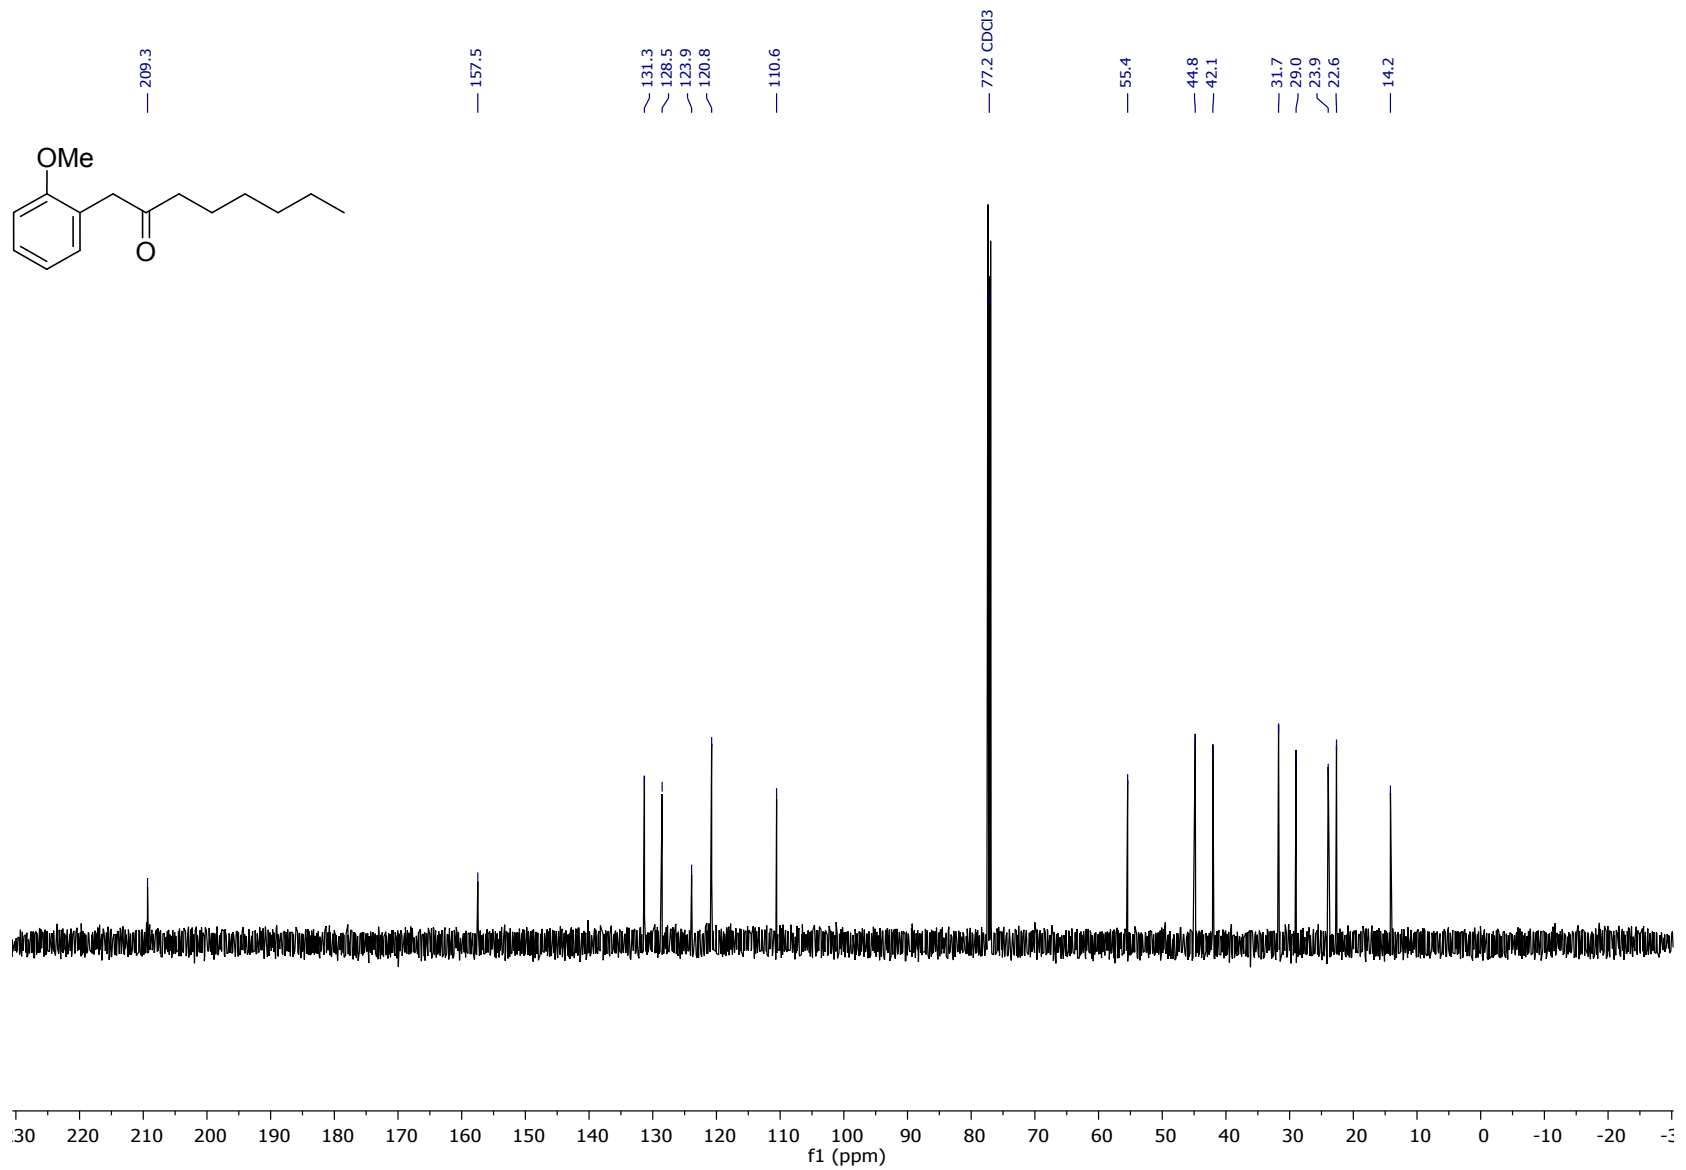

Figure S34.  $^{13}\text{C}\{^1\text{H}\}$  NMR (151 MHz, Chloroform-d) of 1-(2-methoxyphenyl)octan-2-one (15b).

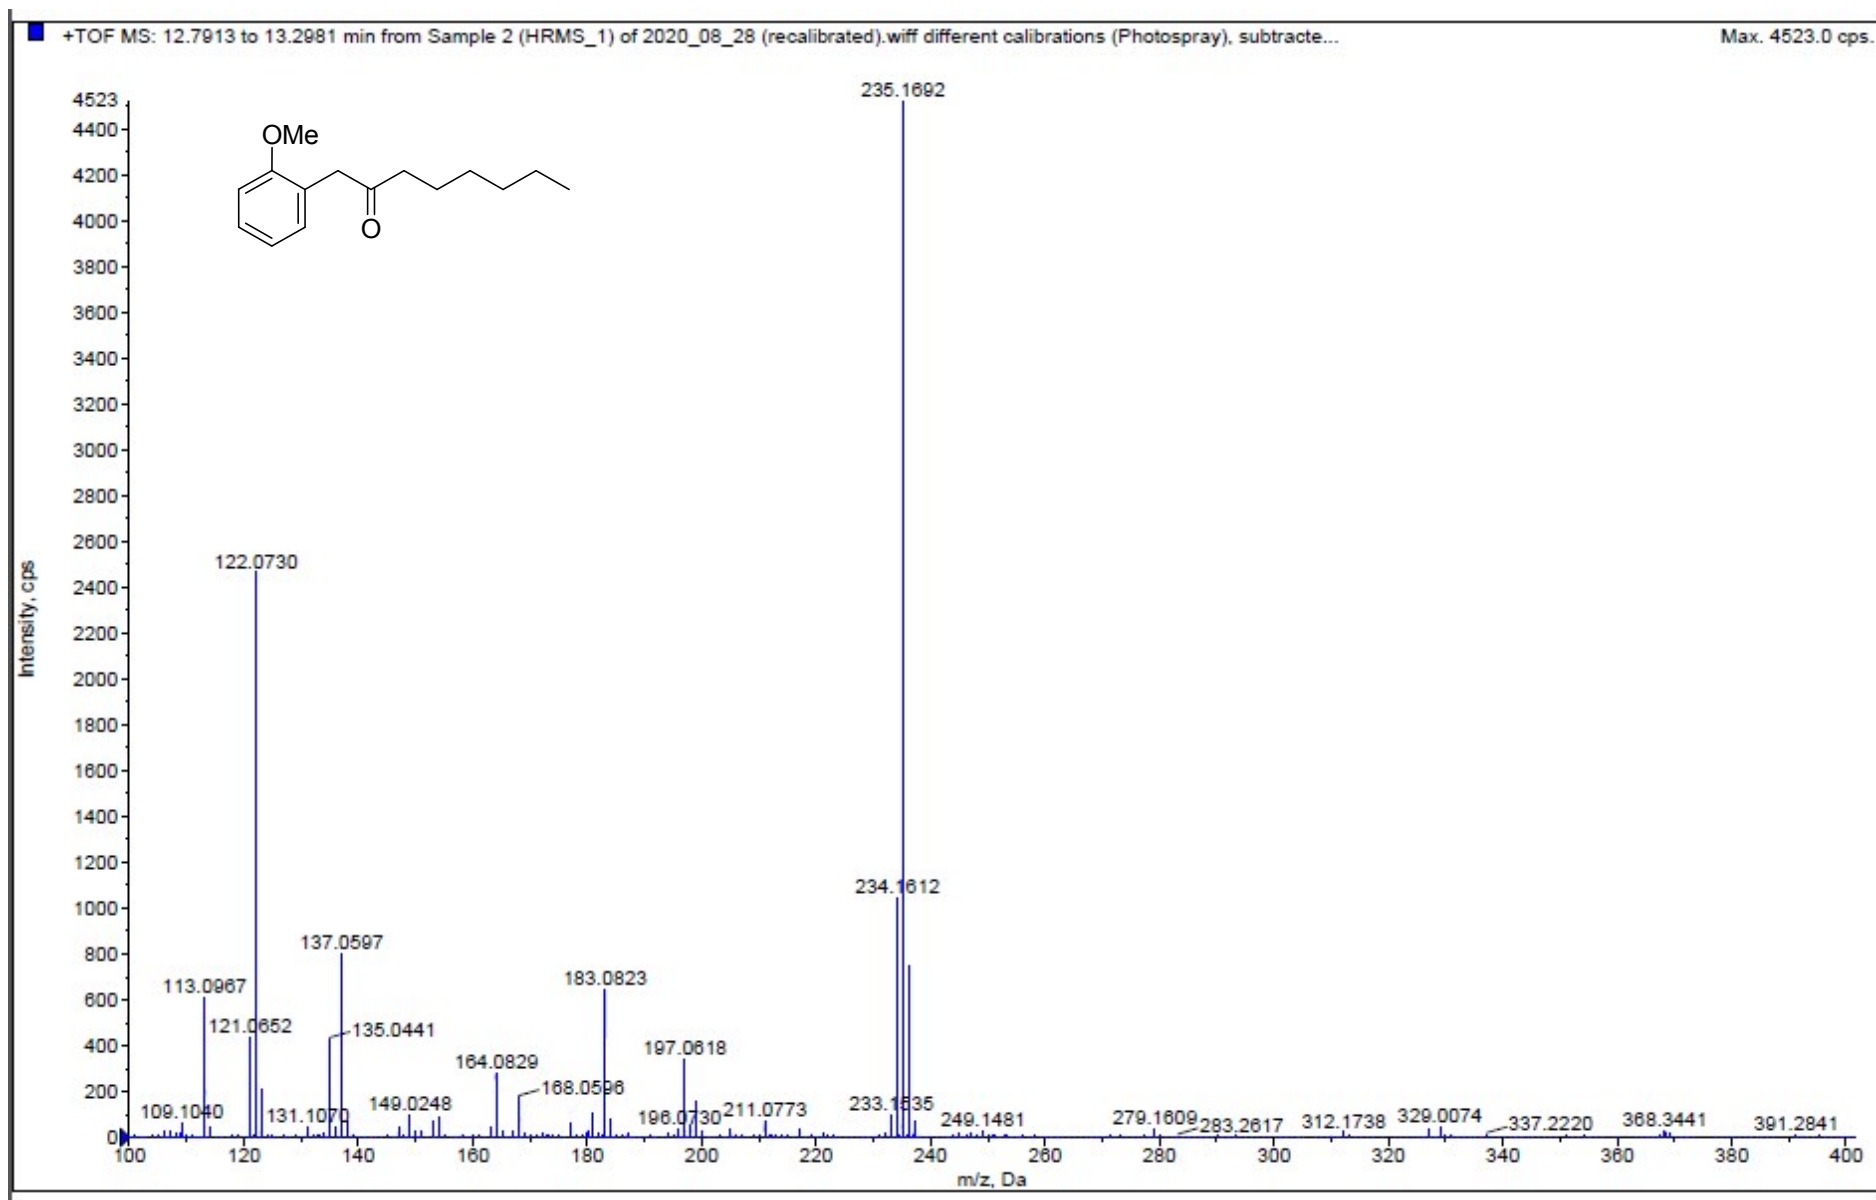

Figure S35. HRMS spectra of 1-(2-methoxyphenyl)octan-2-one (15b).

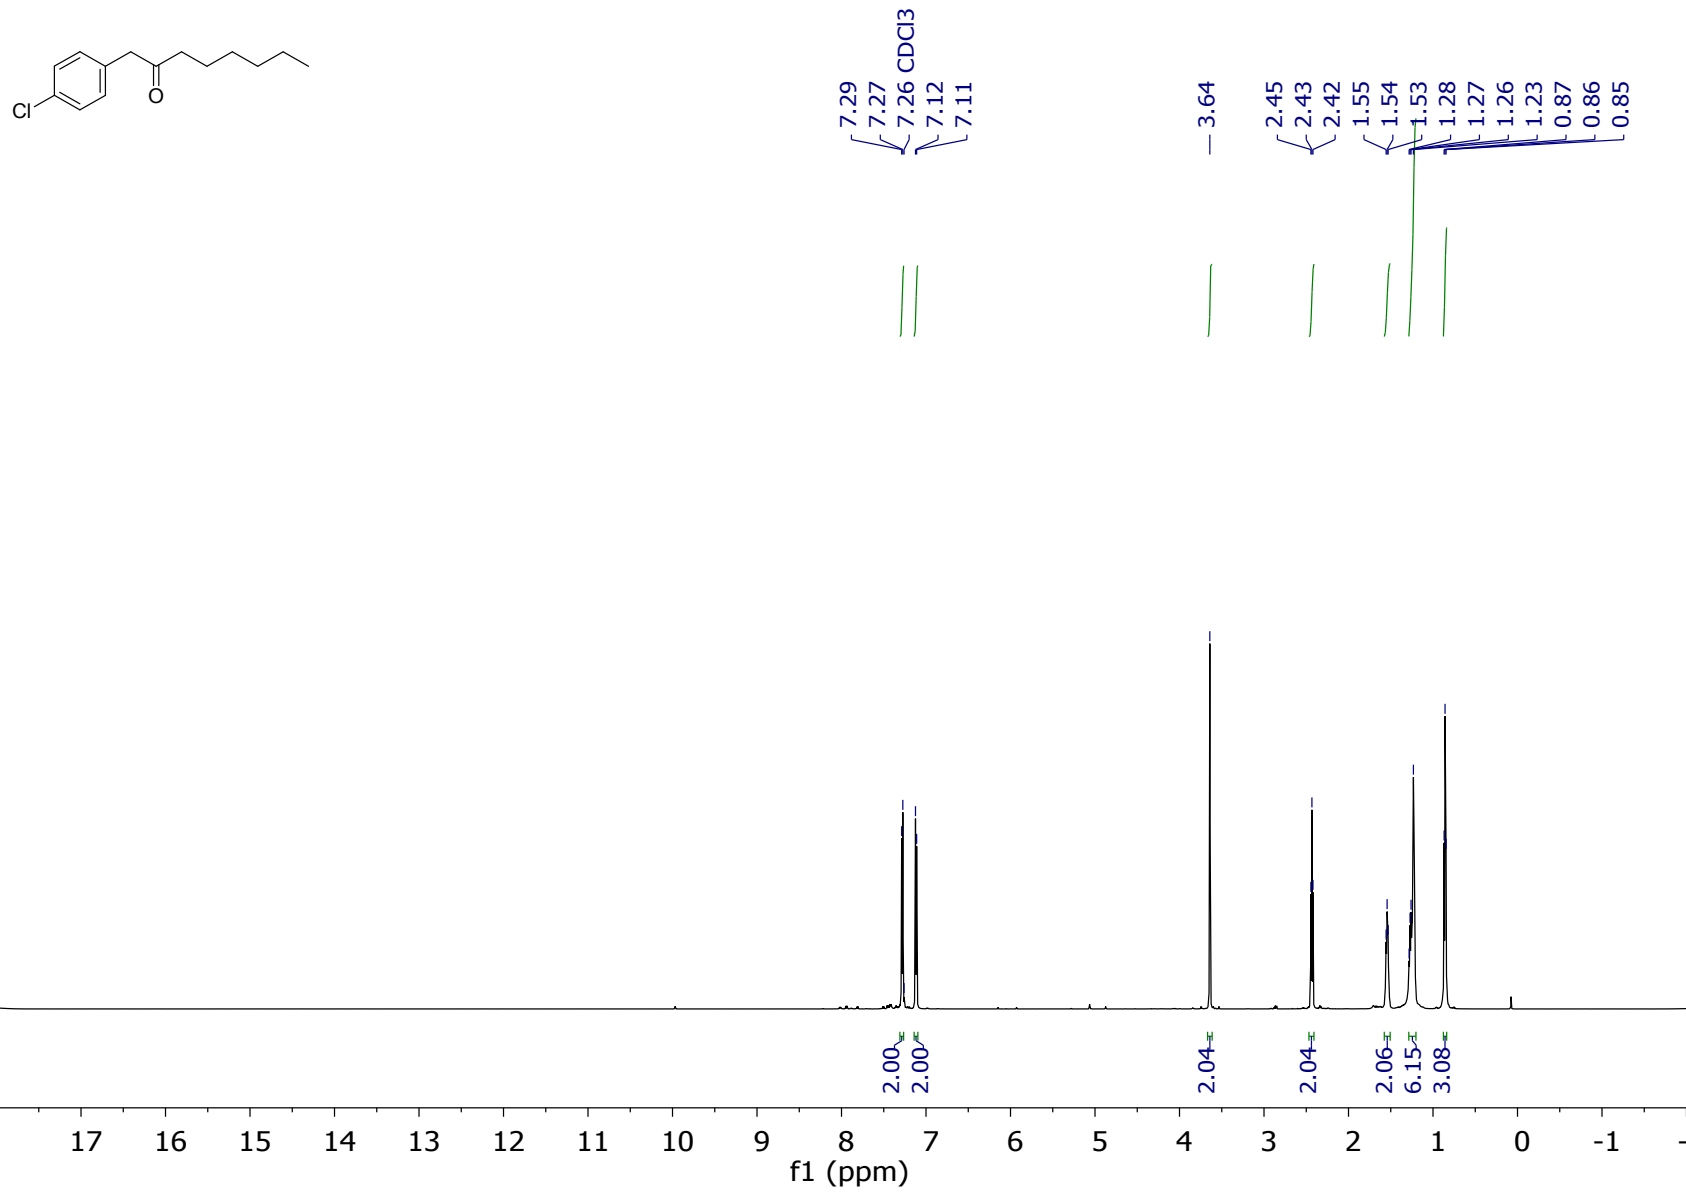

Figure S43. <sup>1</sup>H NMR (600 MHz, Chloroform-d) of 1-(4-chlorophenyl)octan-2-one (16b).



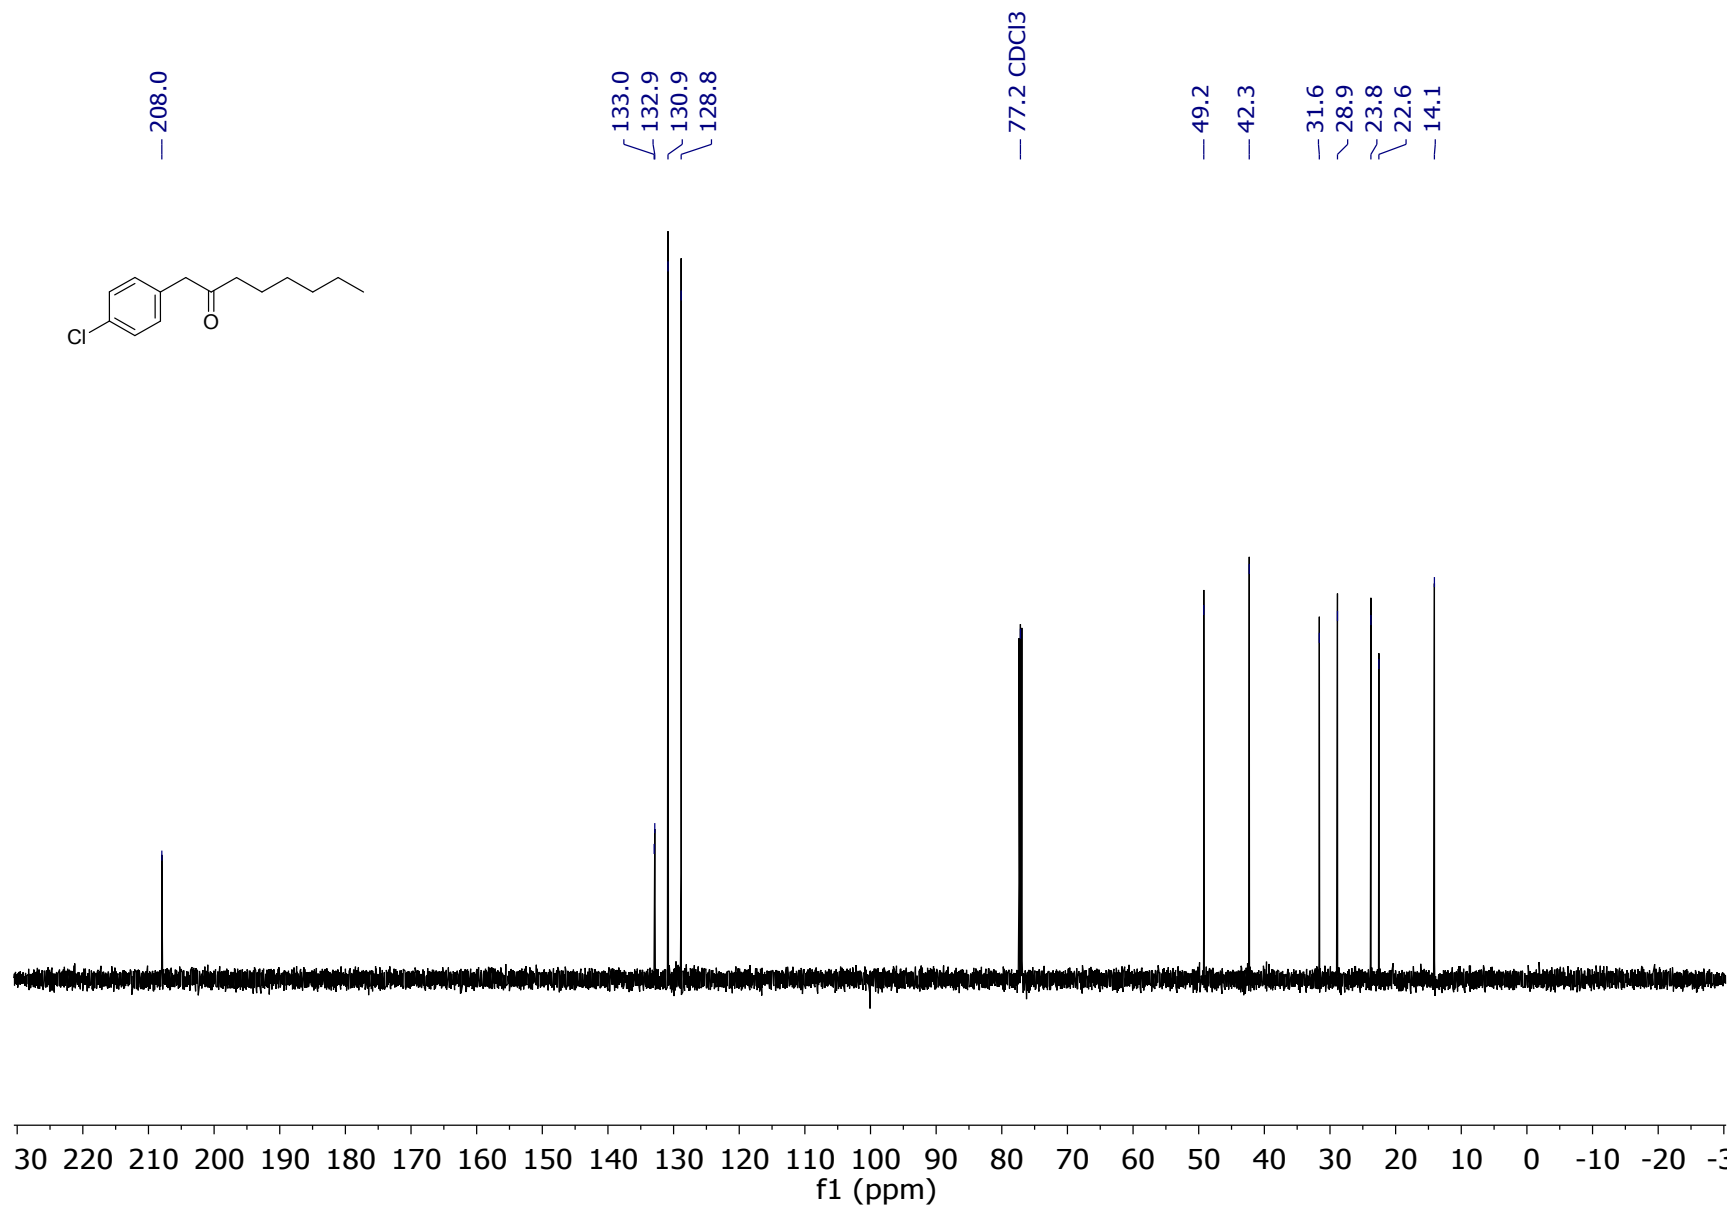

Figure S44. <sup>1</sup>H NMR (600 MHz, Chloroform-d) of 1-(4-chlorophenyl)octan-2-one (16b).

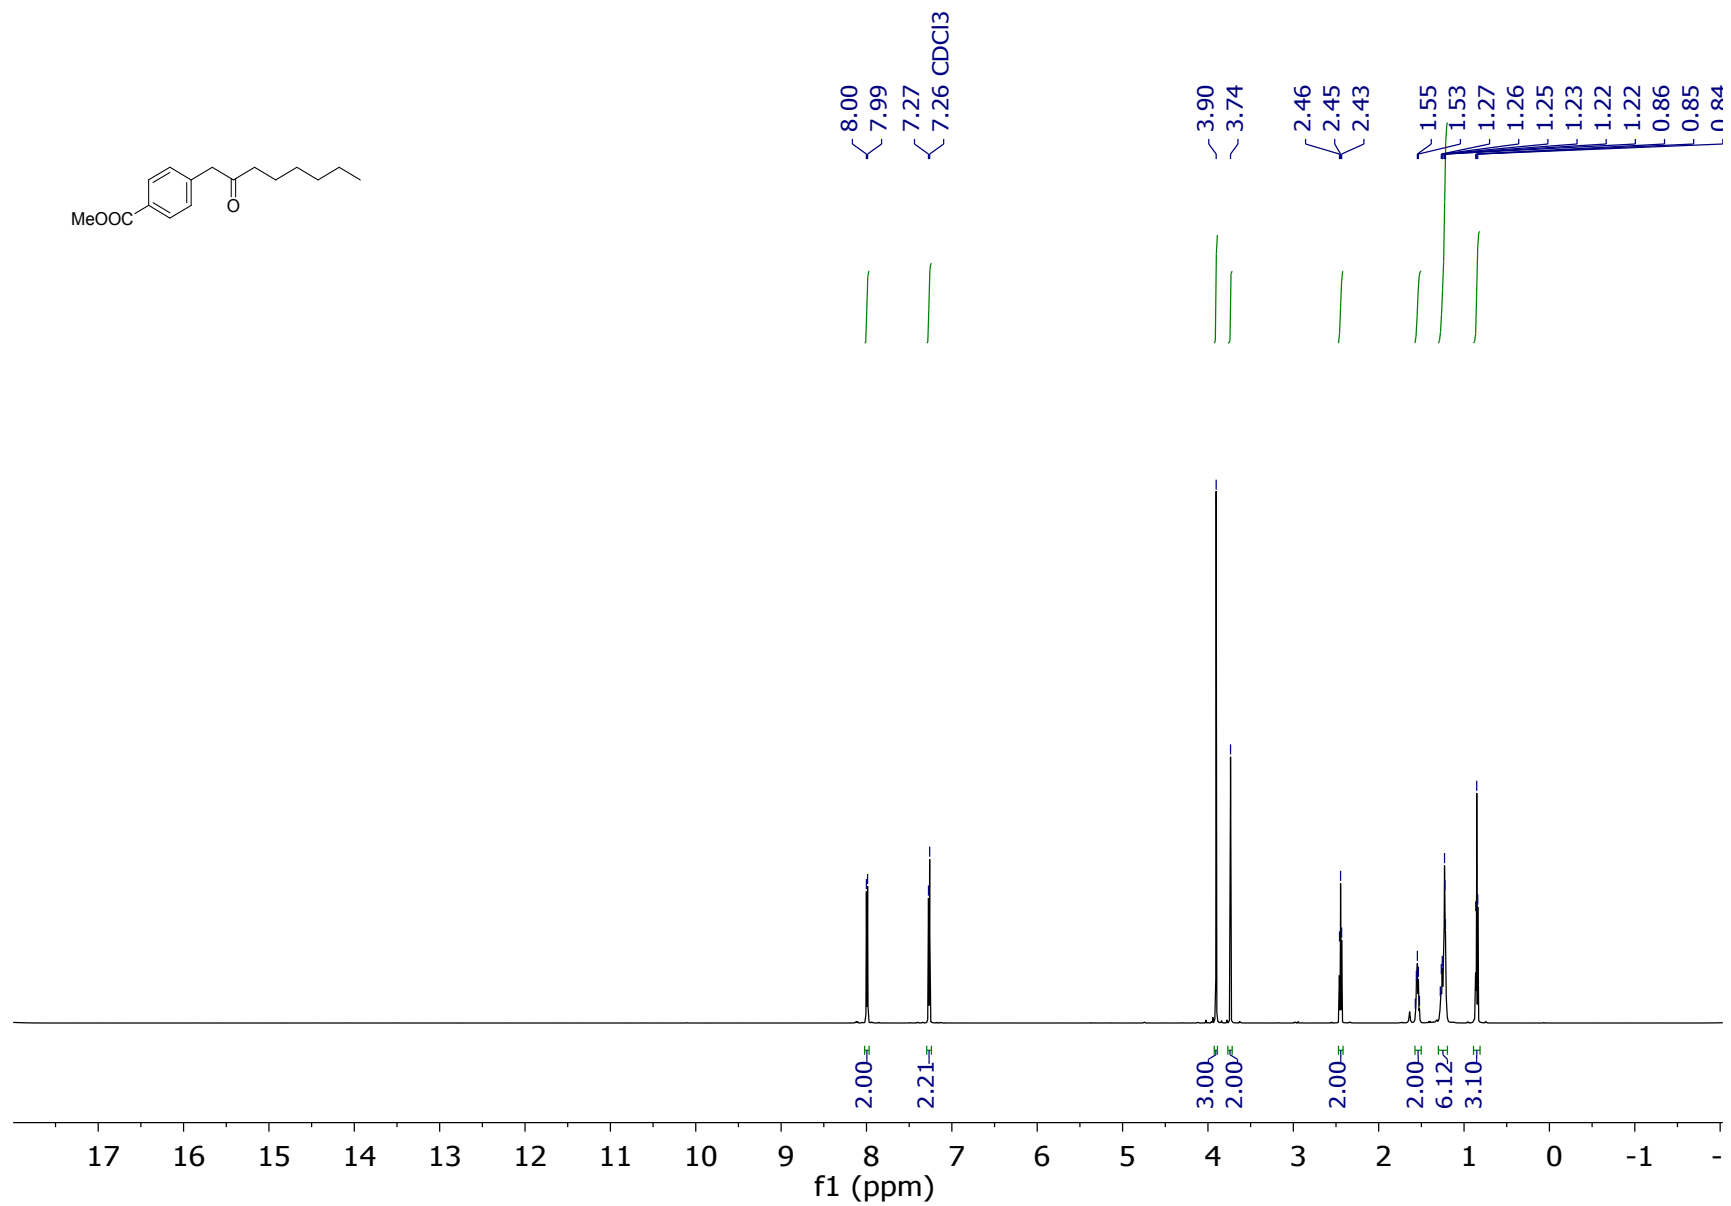

Figure S38. <sup>1</sup>H NMR (600 MHz, Chloroform-d) of methyl 4-(2-oxooctyl)benzoate (17b).

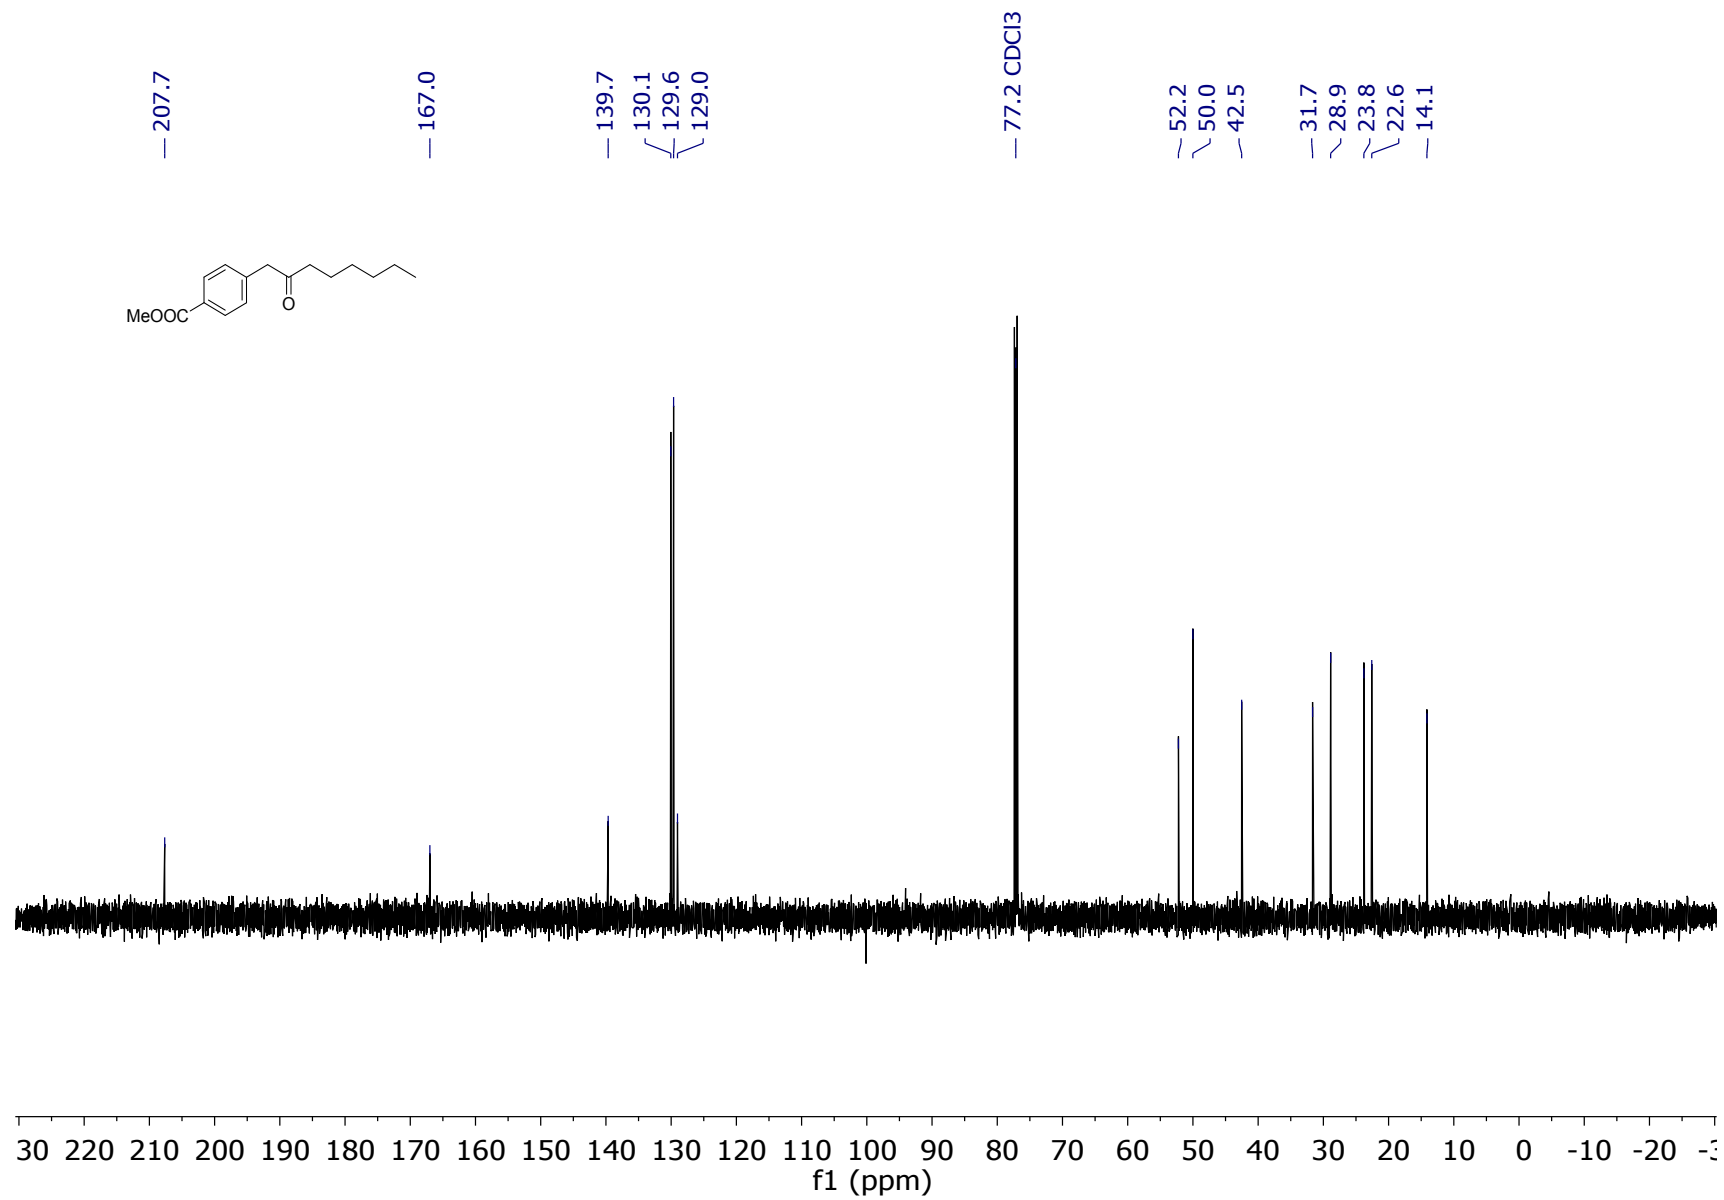

Figure S39.  $^{13}\text{C}\{^1\text{H}\}$  NMR (151 MHz, Chloroform-d) of methyl 4-(2-oxooctyl)benzoate (17b).

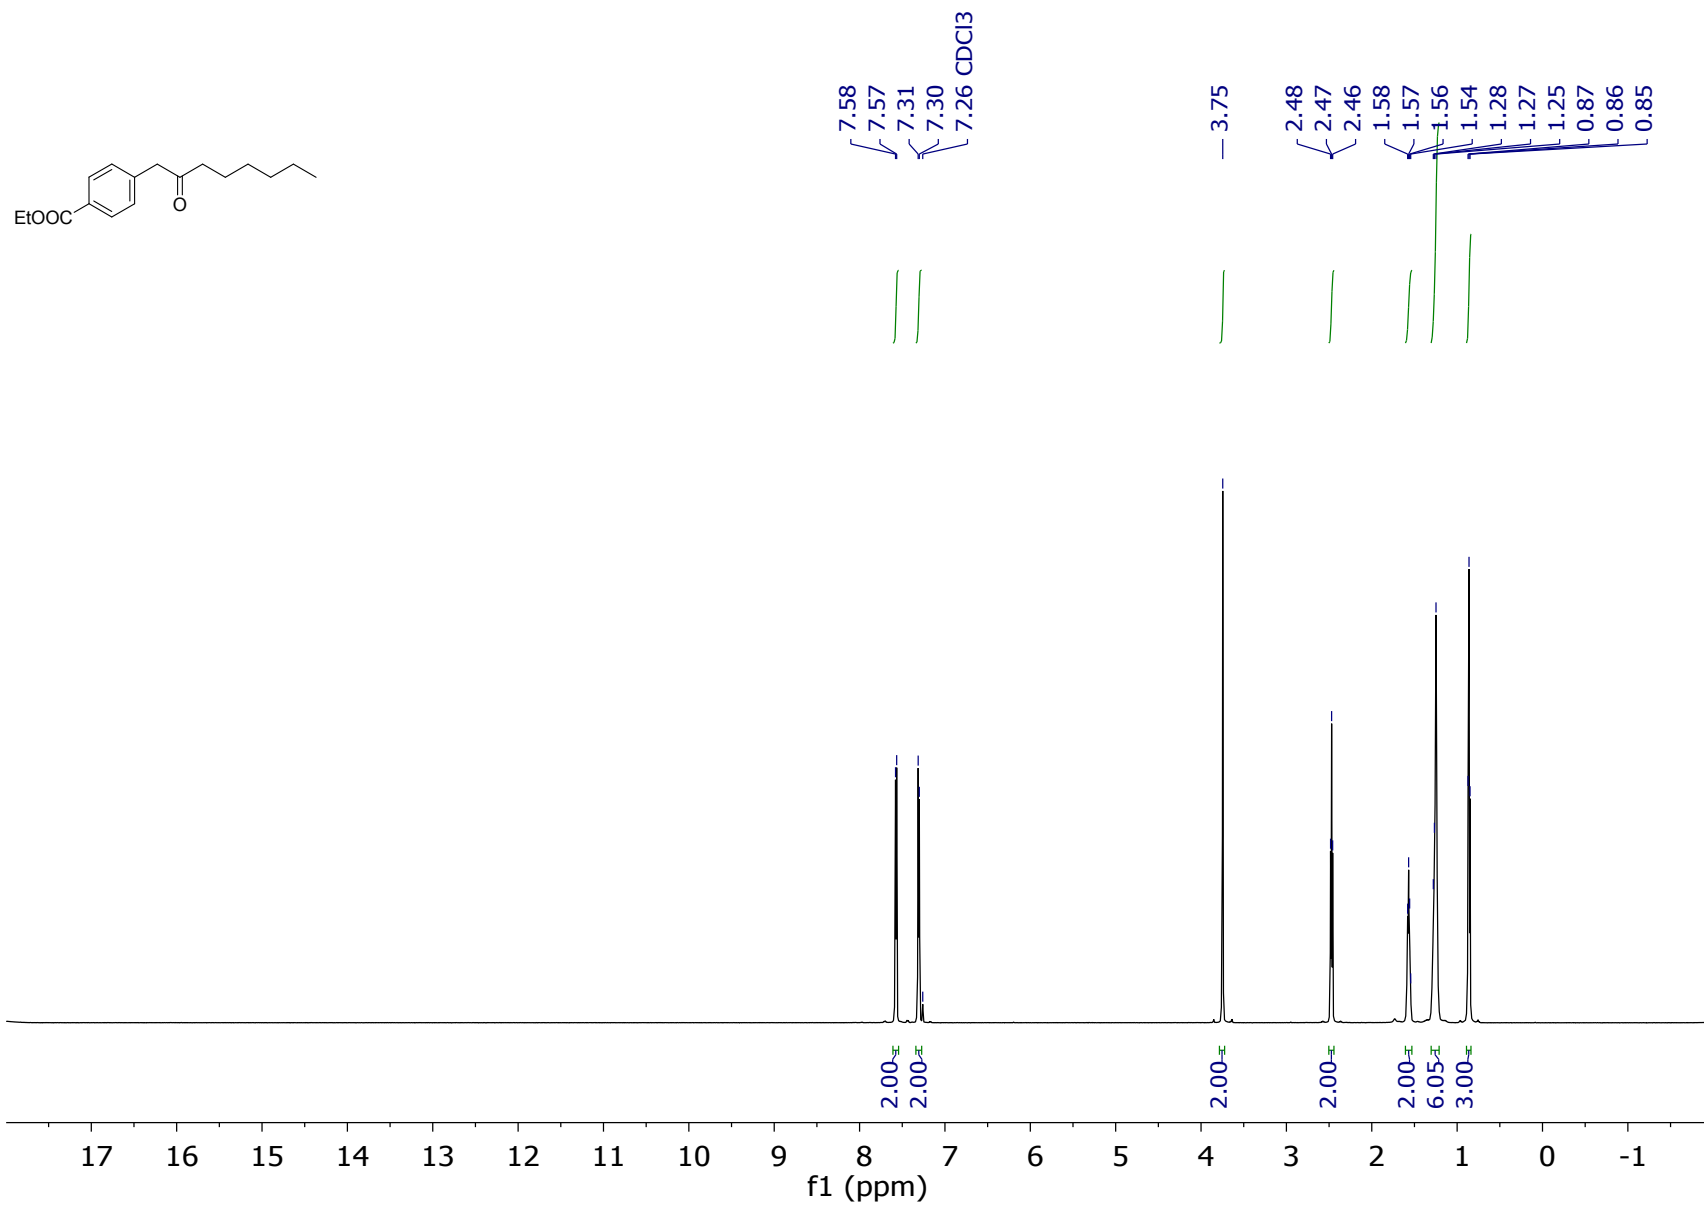

Figure S40. <sup>1</sup>H NMR (600 MHz, Chloroform-d) of ethyl 4-(2-oxooctyl)benzoate (18b).

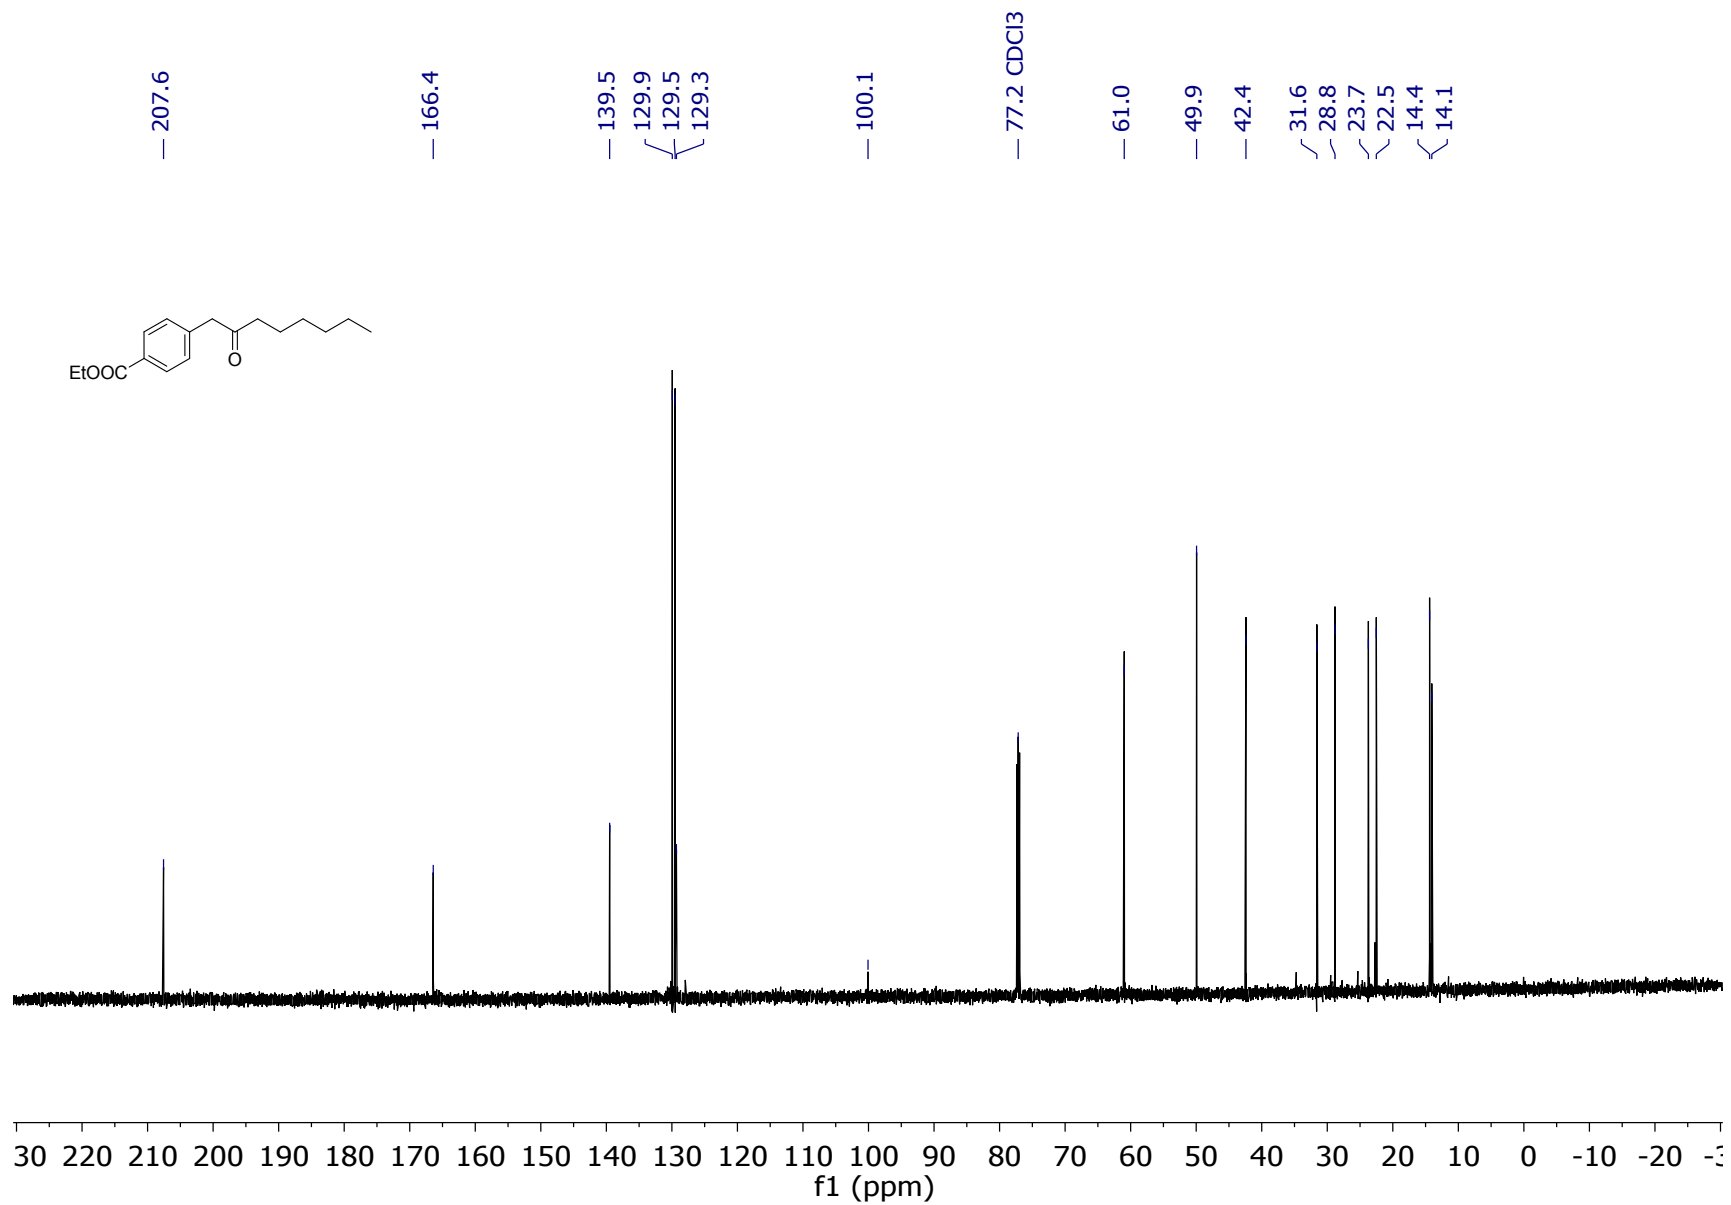

Figure S41.  $^{13}\text{C}\{^1\text{H}\}$  NMR (151 MHz, Chloroform-d) of ethyl 4-(2-oxooctyl)benzoate (18b).

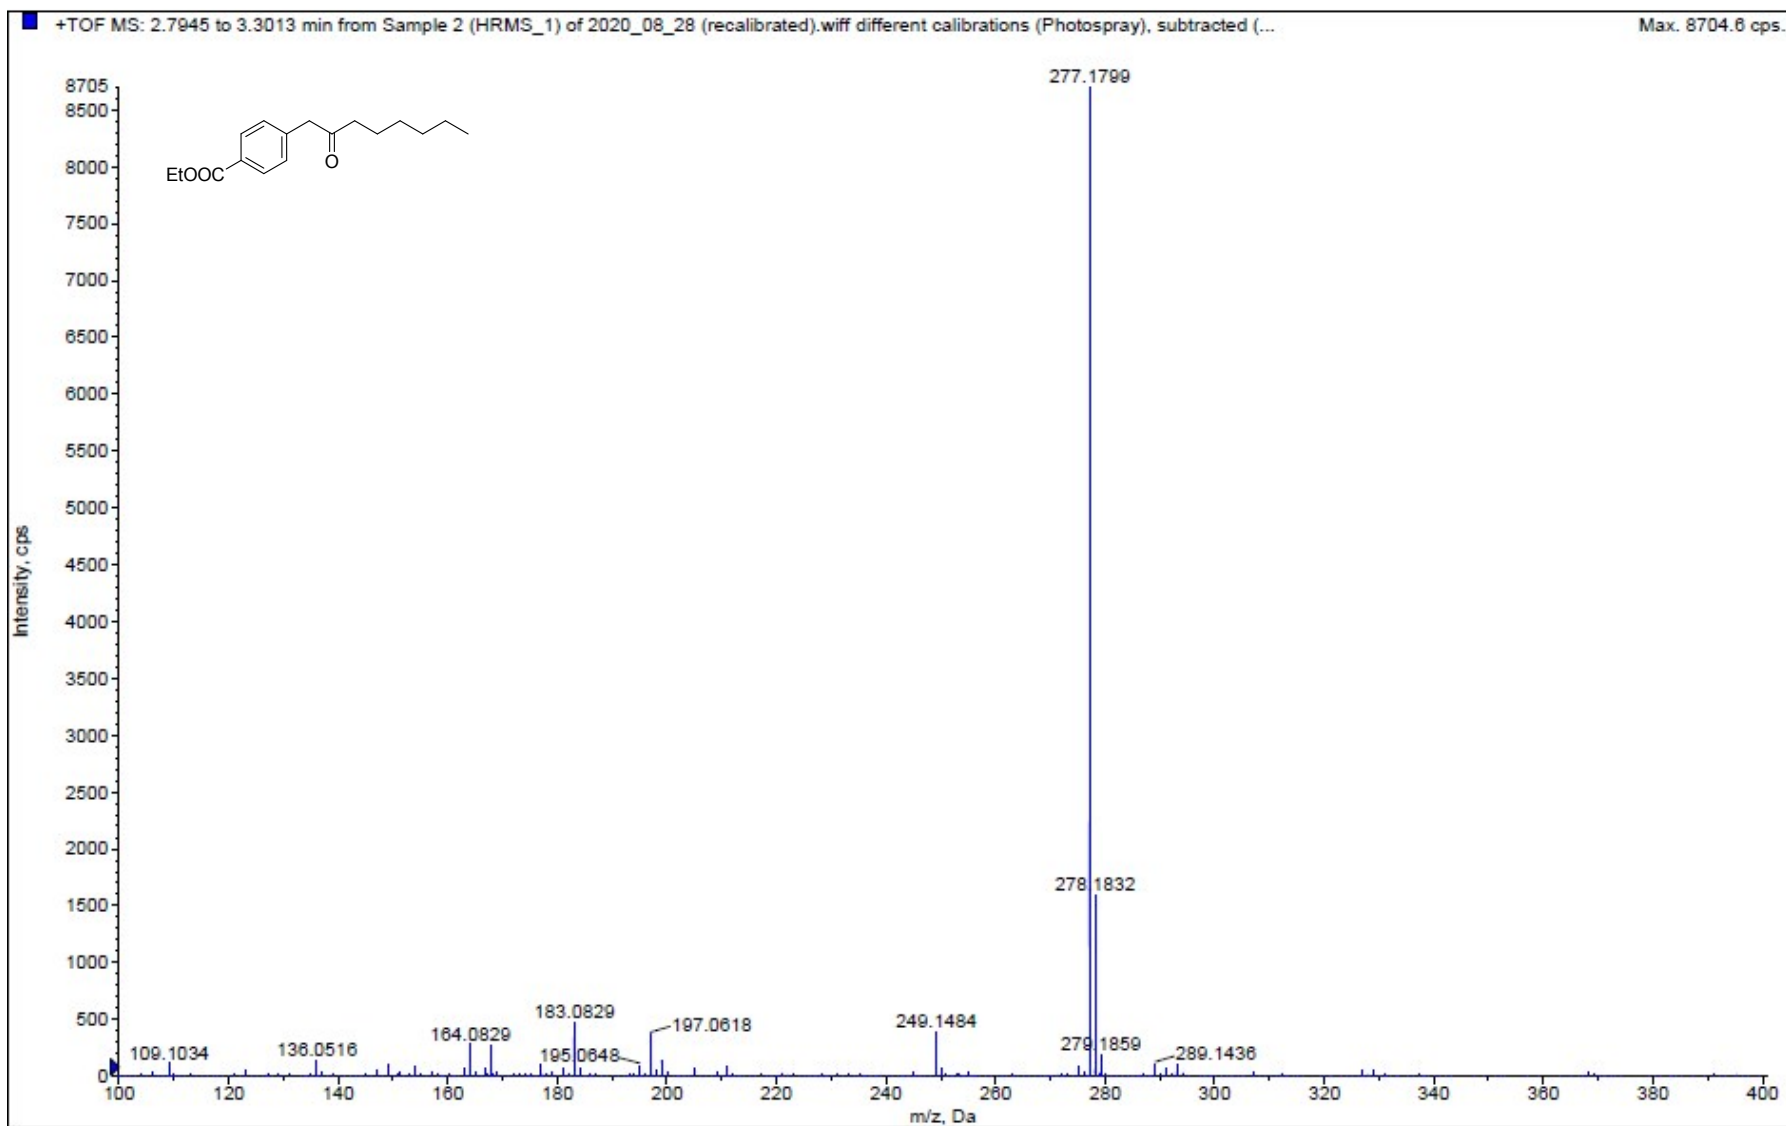

Figure S42. HRMS spectra of ethyl 4-(2-oxooctyl)benzoate (18b).

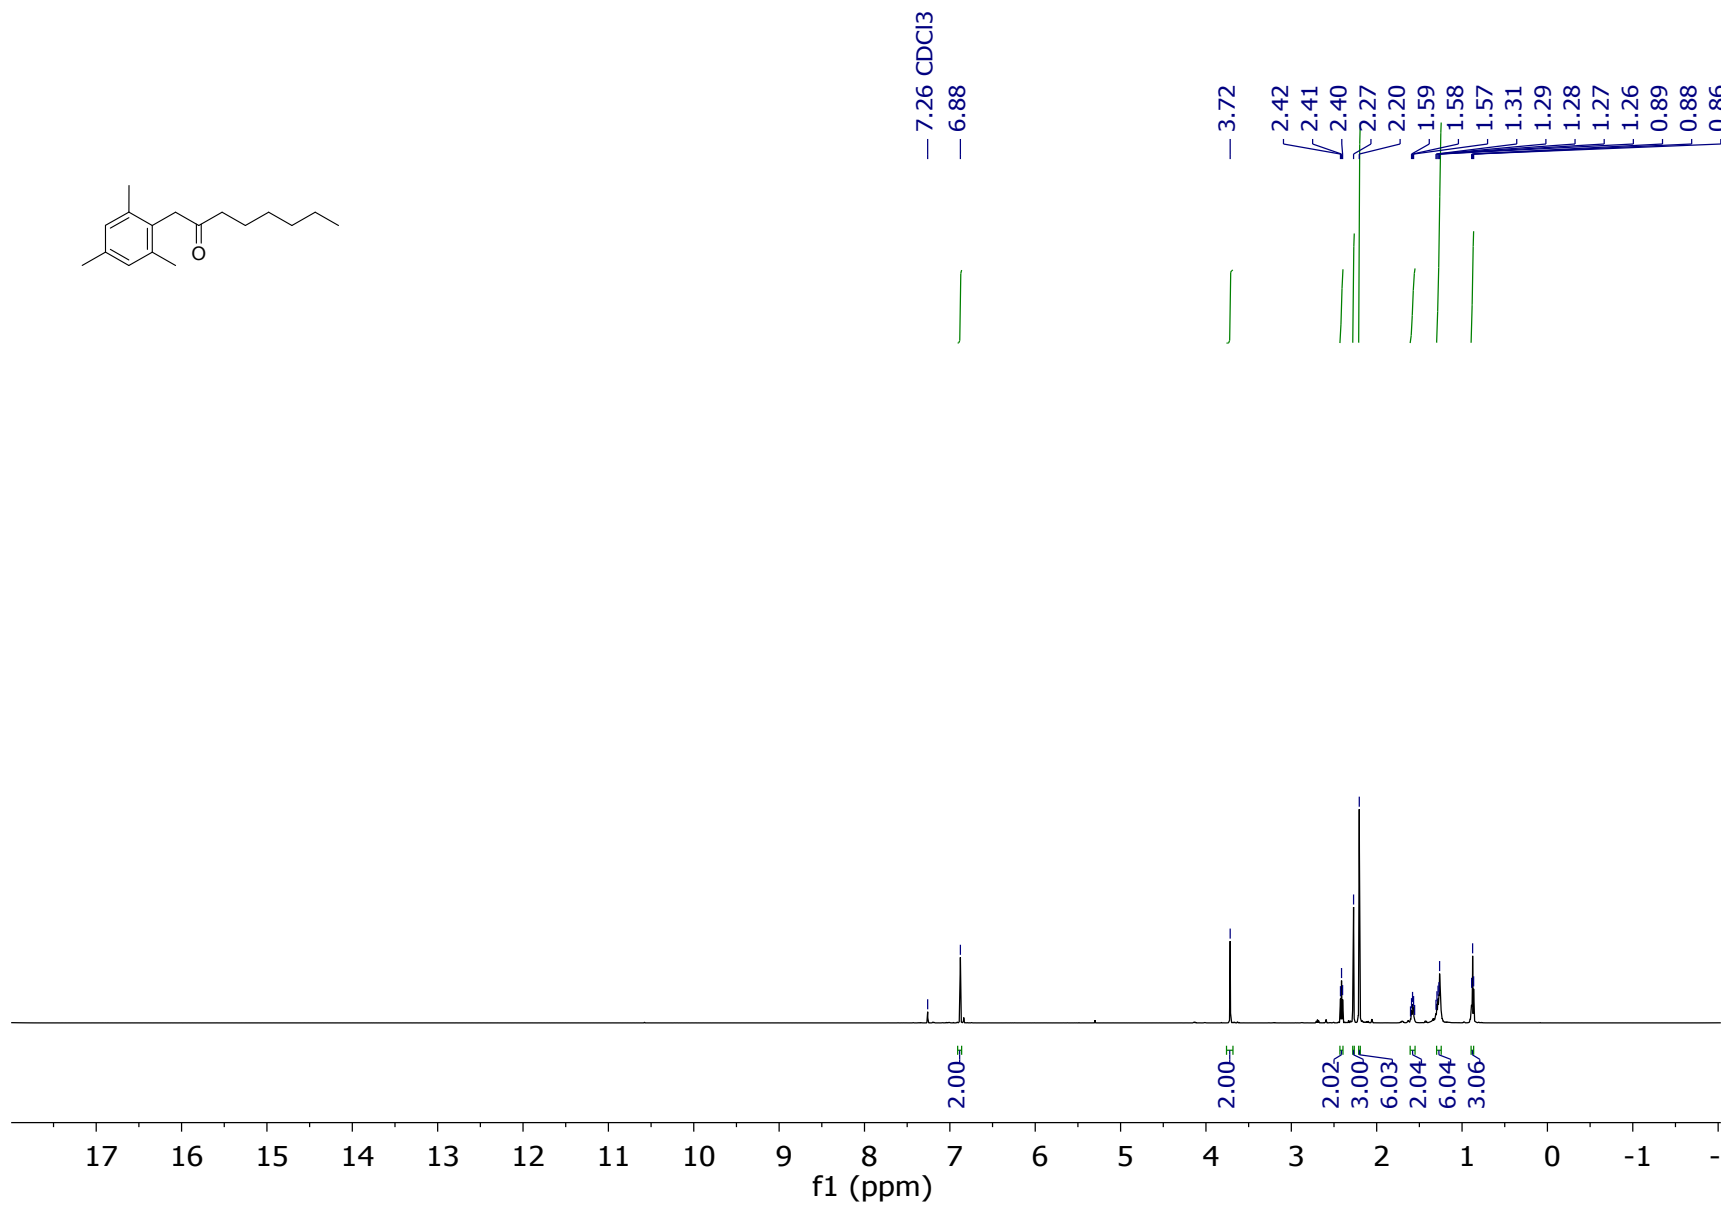

Figure S45. <sup>1</sup>H NMR (600 MHz, Chloroform-d) of 1-mesityloctan-2-one (19b).

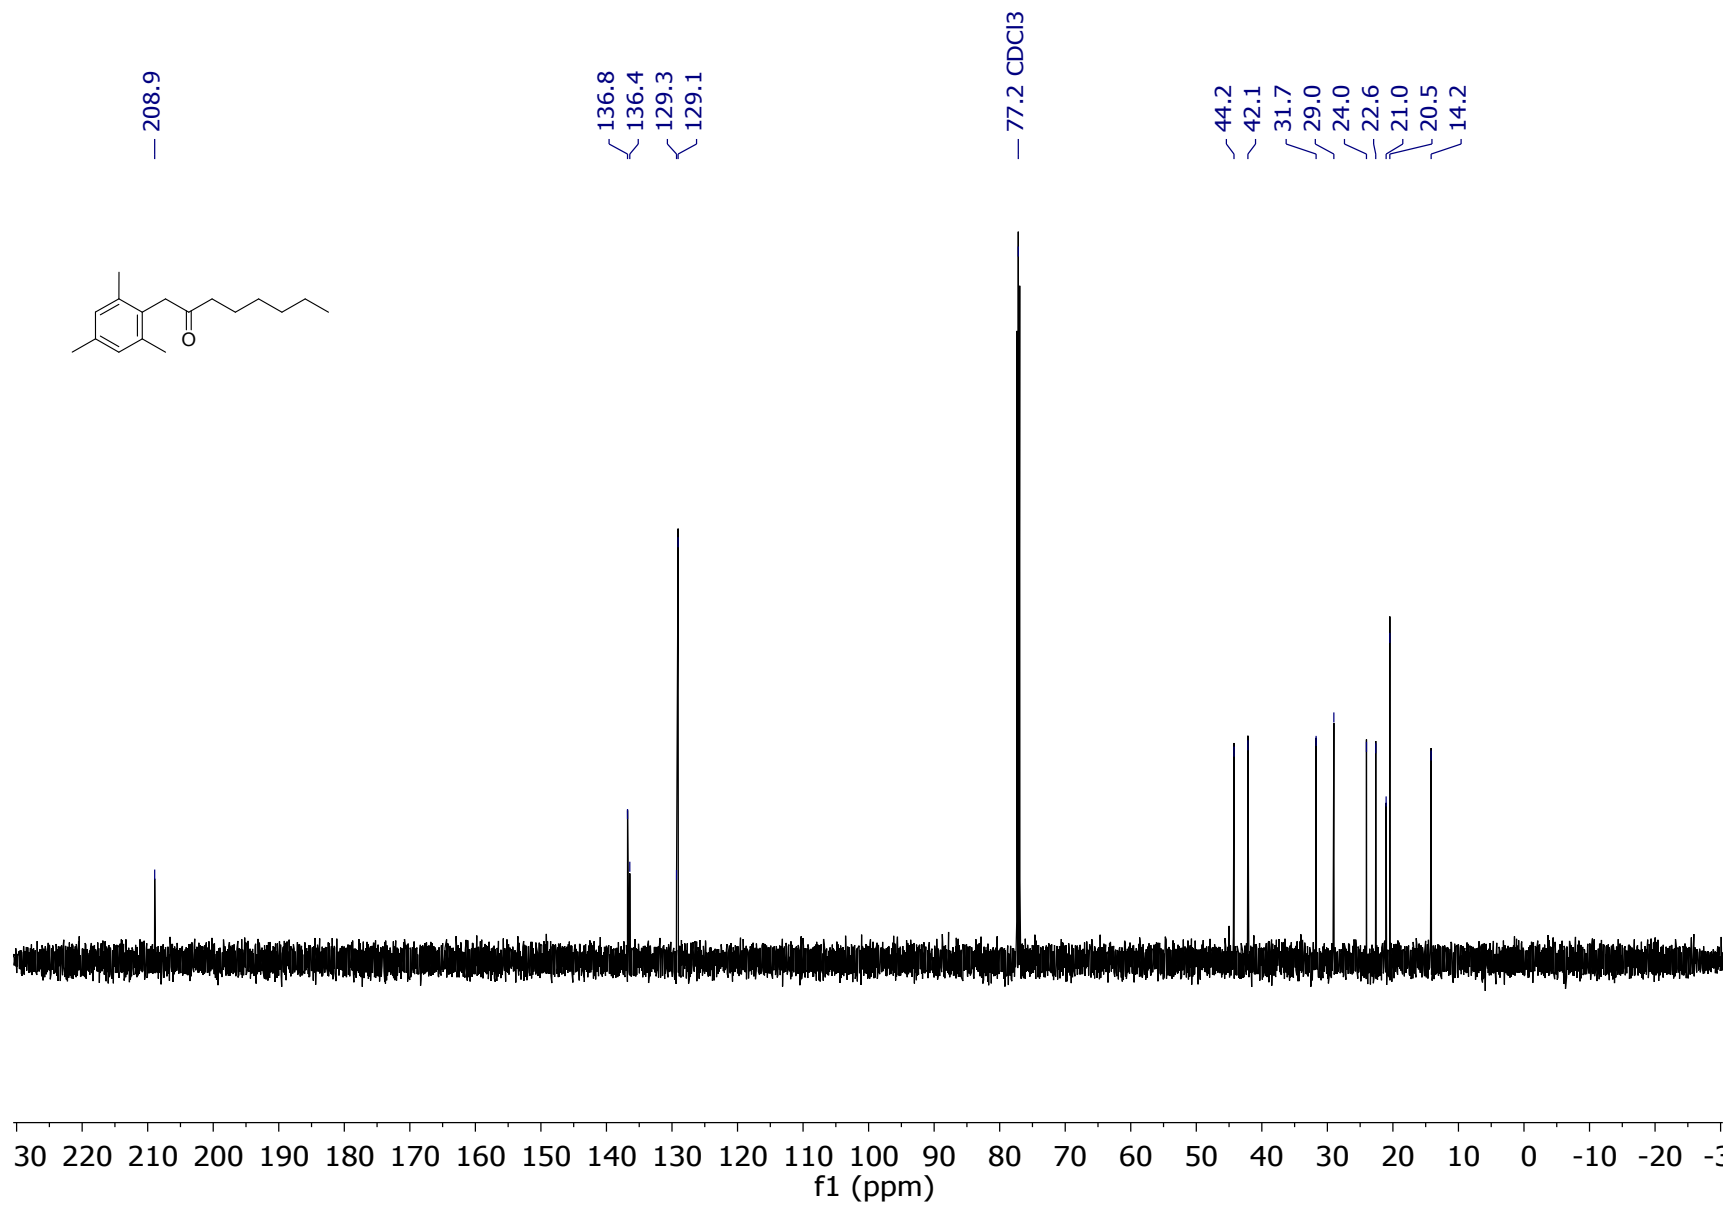

Figure S46.  $^{13}\text{C}\{^1\text{H}\}$  NMR (151 MHz, Chloroform-d) of 1-mesityloctan-2-one (19b).



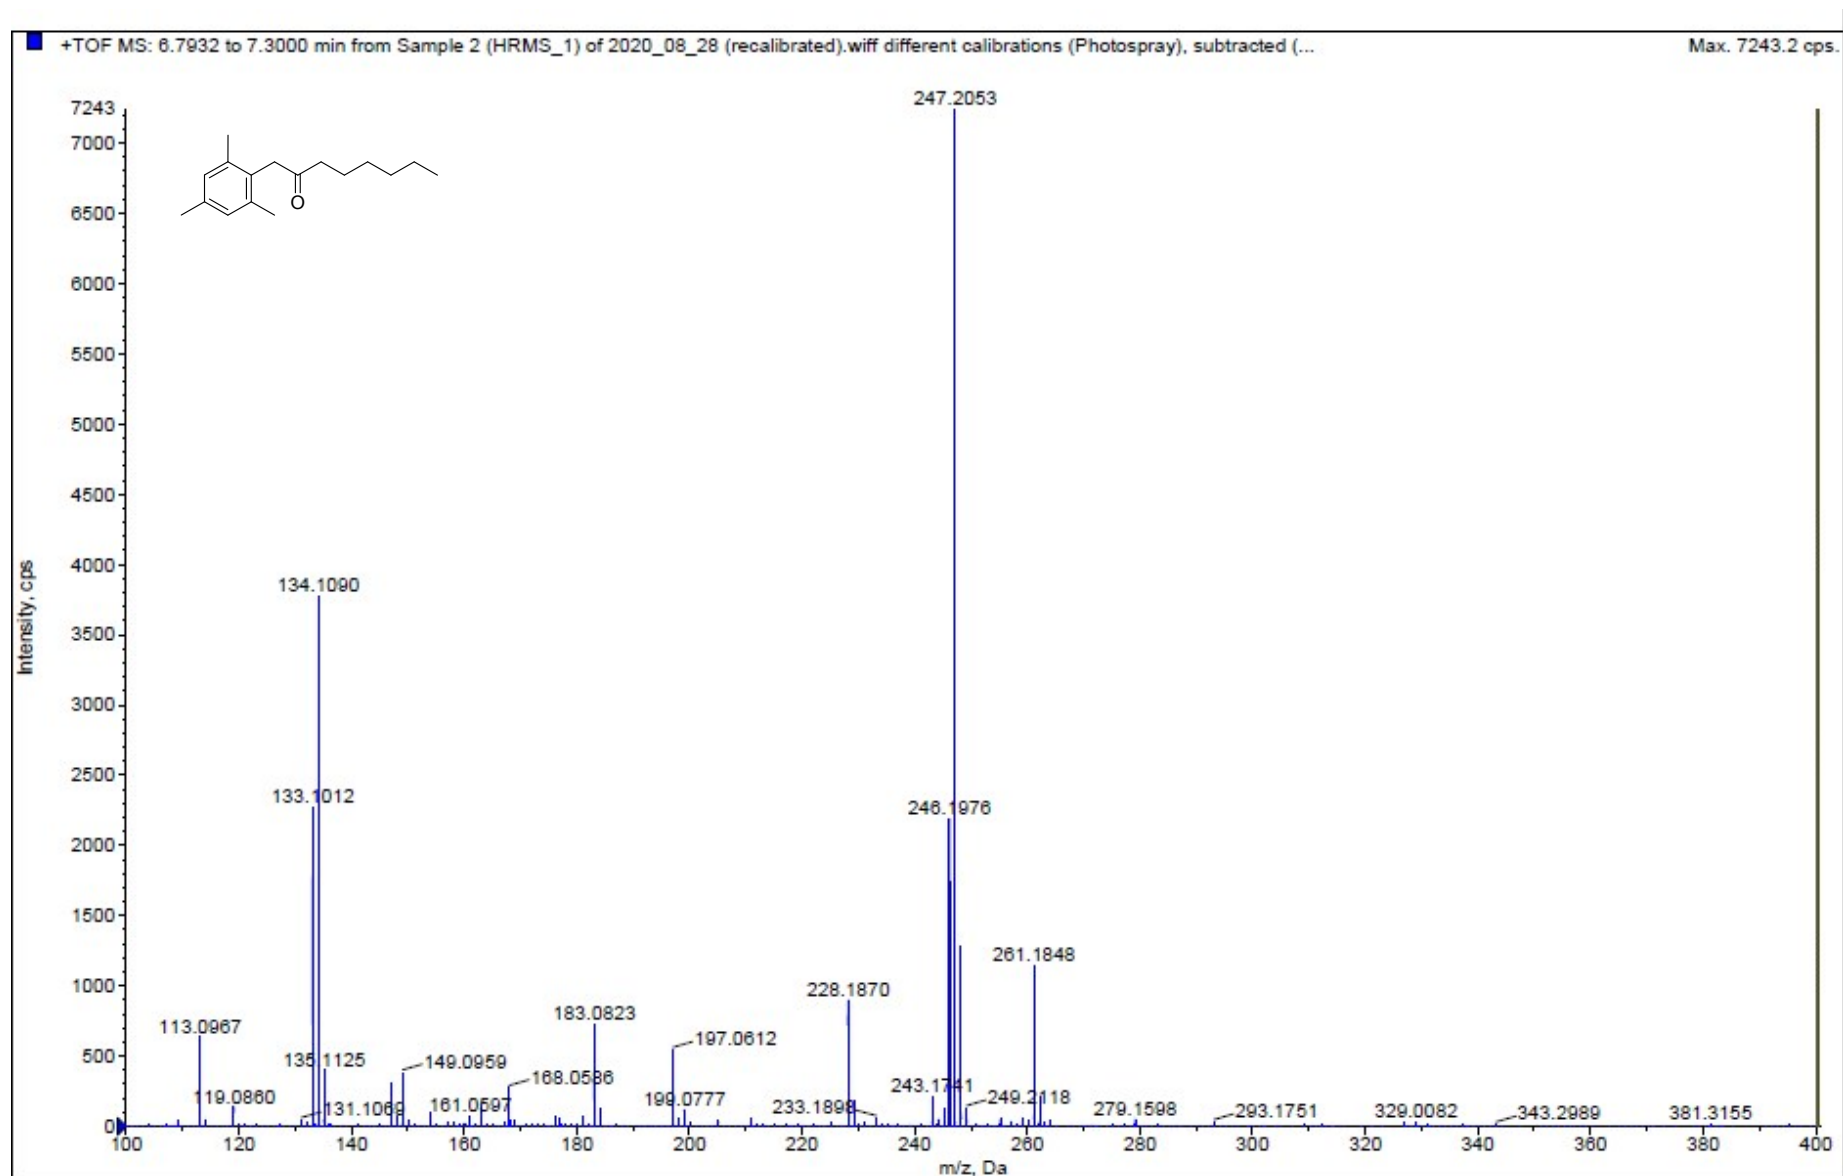

Figure S47. HRMS spectra of 1-mesityloctan-2-one (19b).

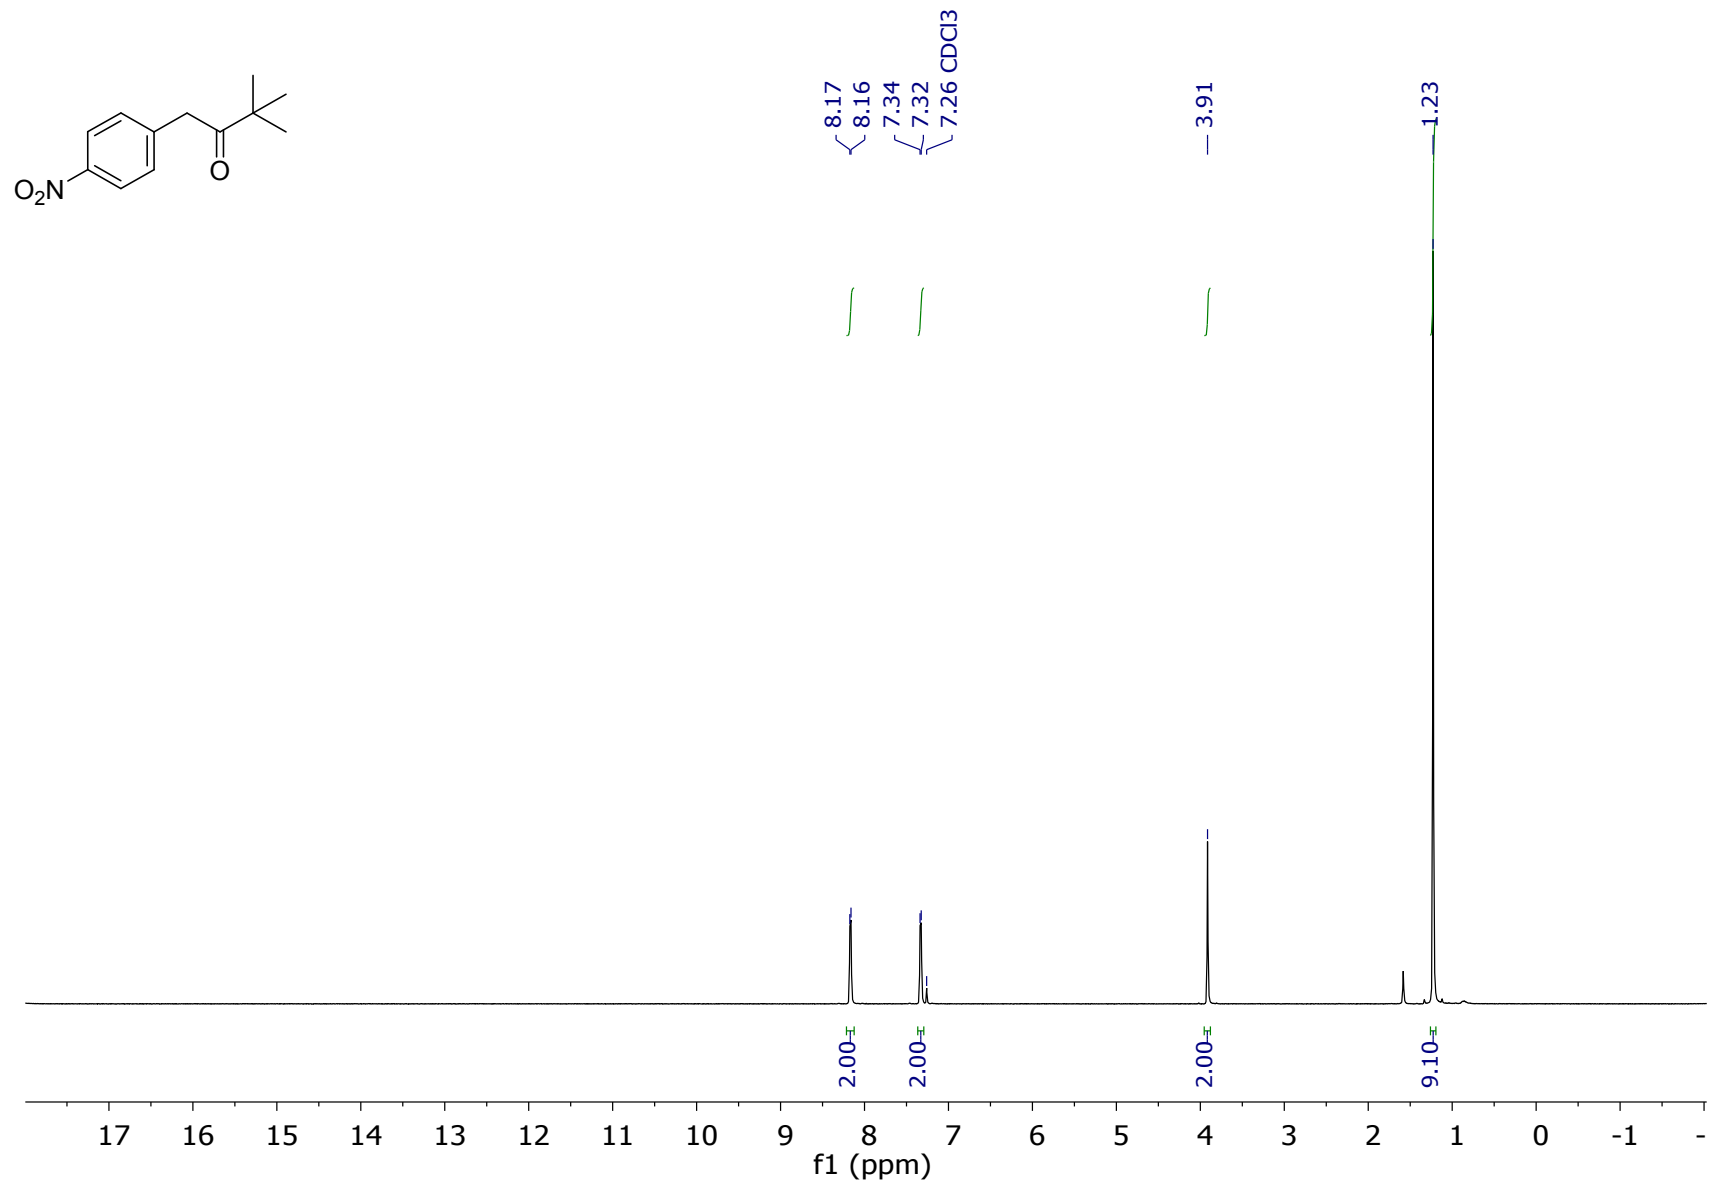

Figure S48. <sup>1</sup>H NMR (600 MHz, Chloroform-d) of 3,3-dimethyl-1-(4-nitrophenyl)butan-2-one (20b).

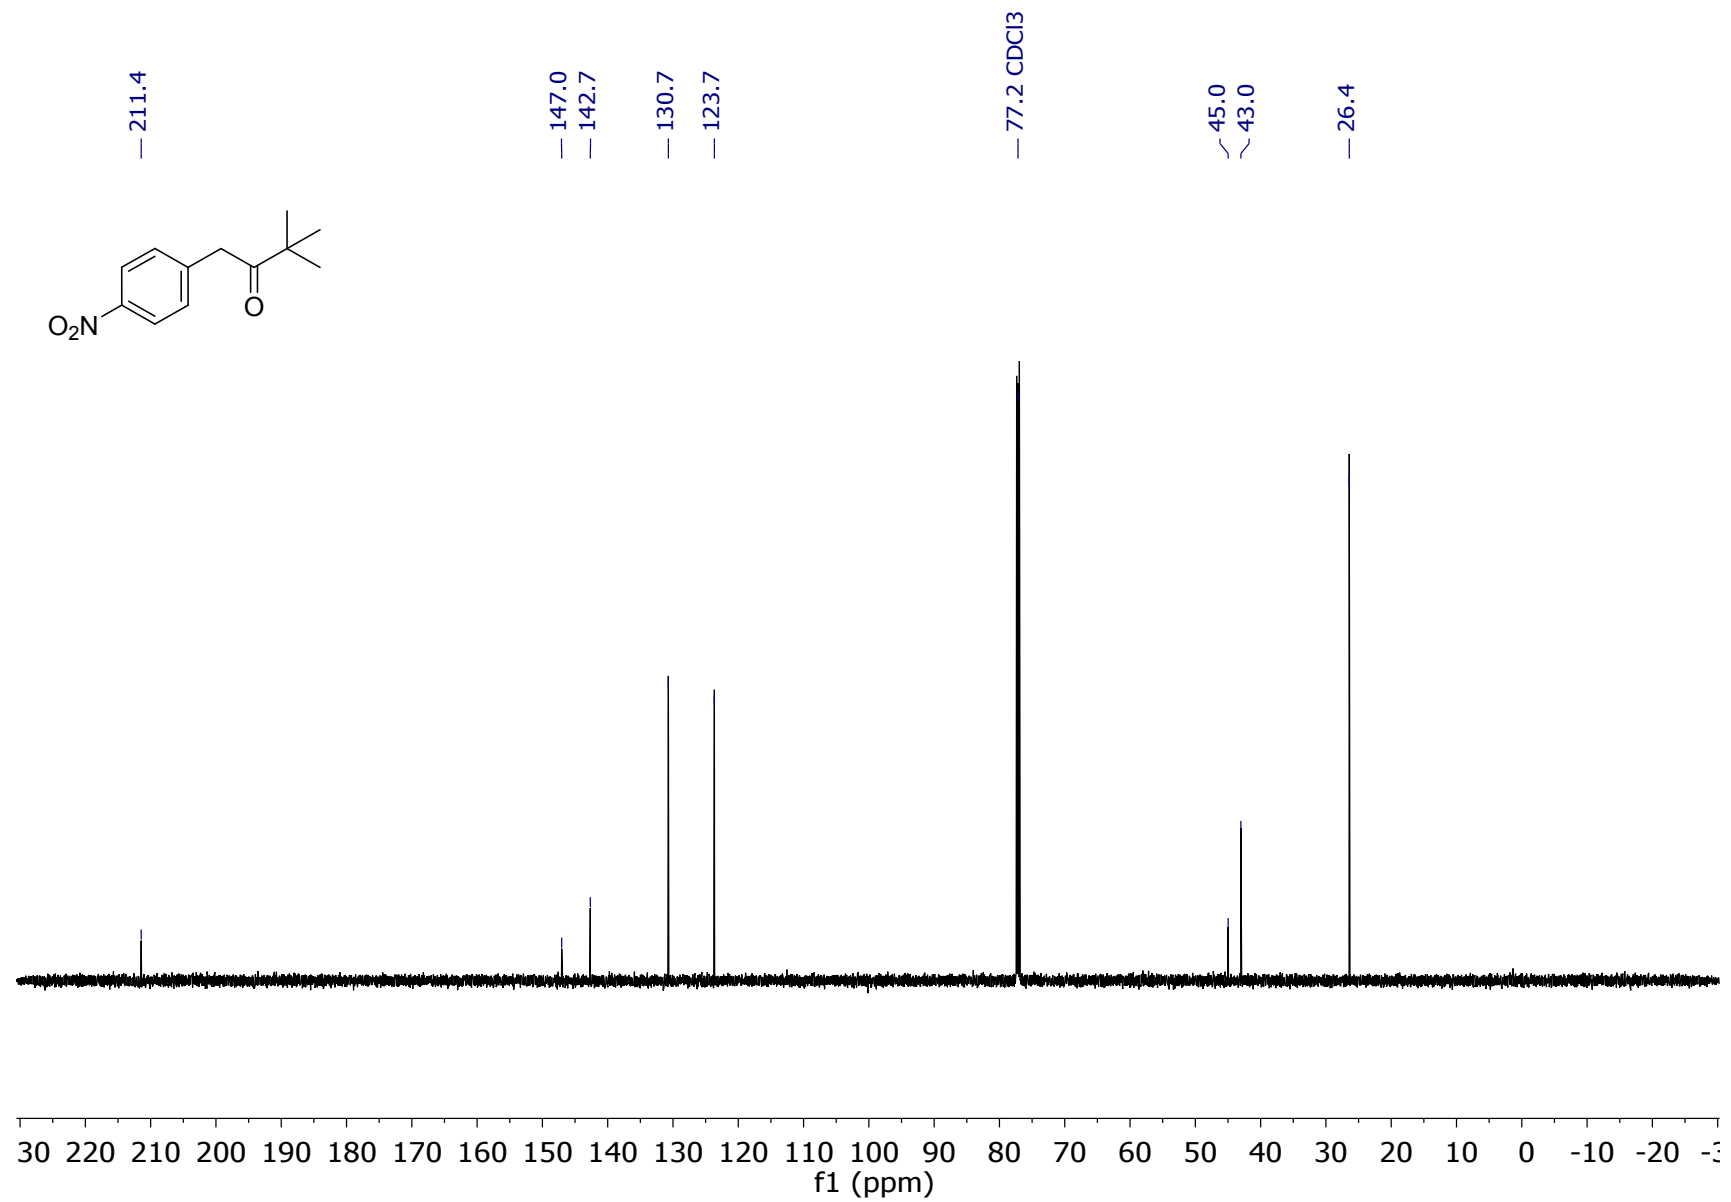

Figure S49.  $^{13}\text{C}\{^1\text{H}\}$  NMR (151 MHz, Chloroform-d) of 3,3-dimethyl-1-(4-nitrophenyl)butan-2-one (20b).

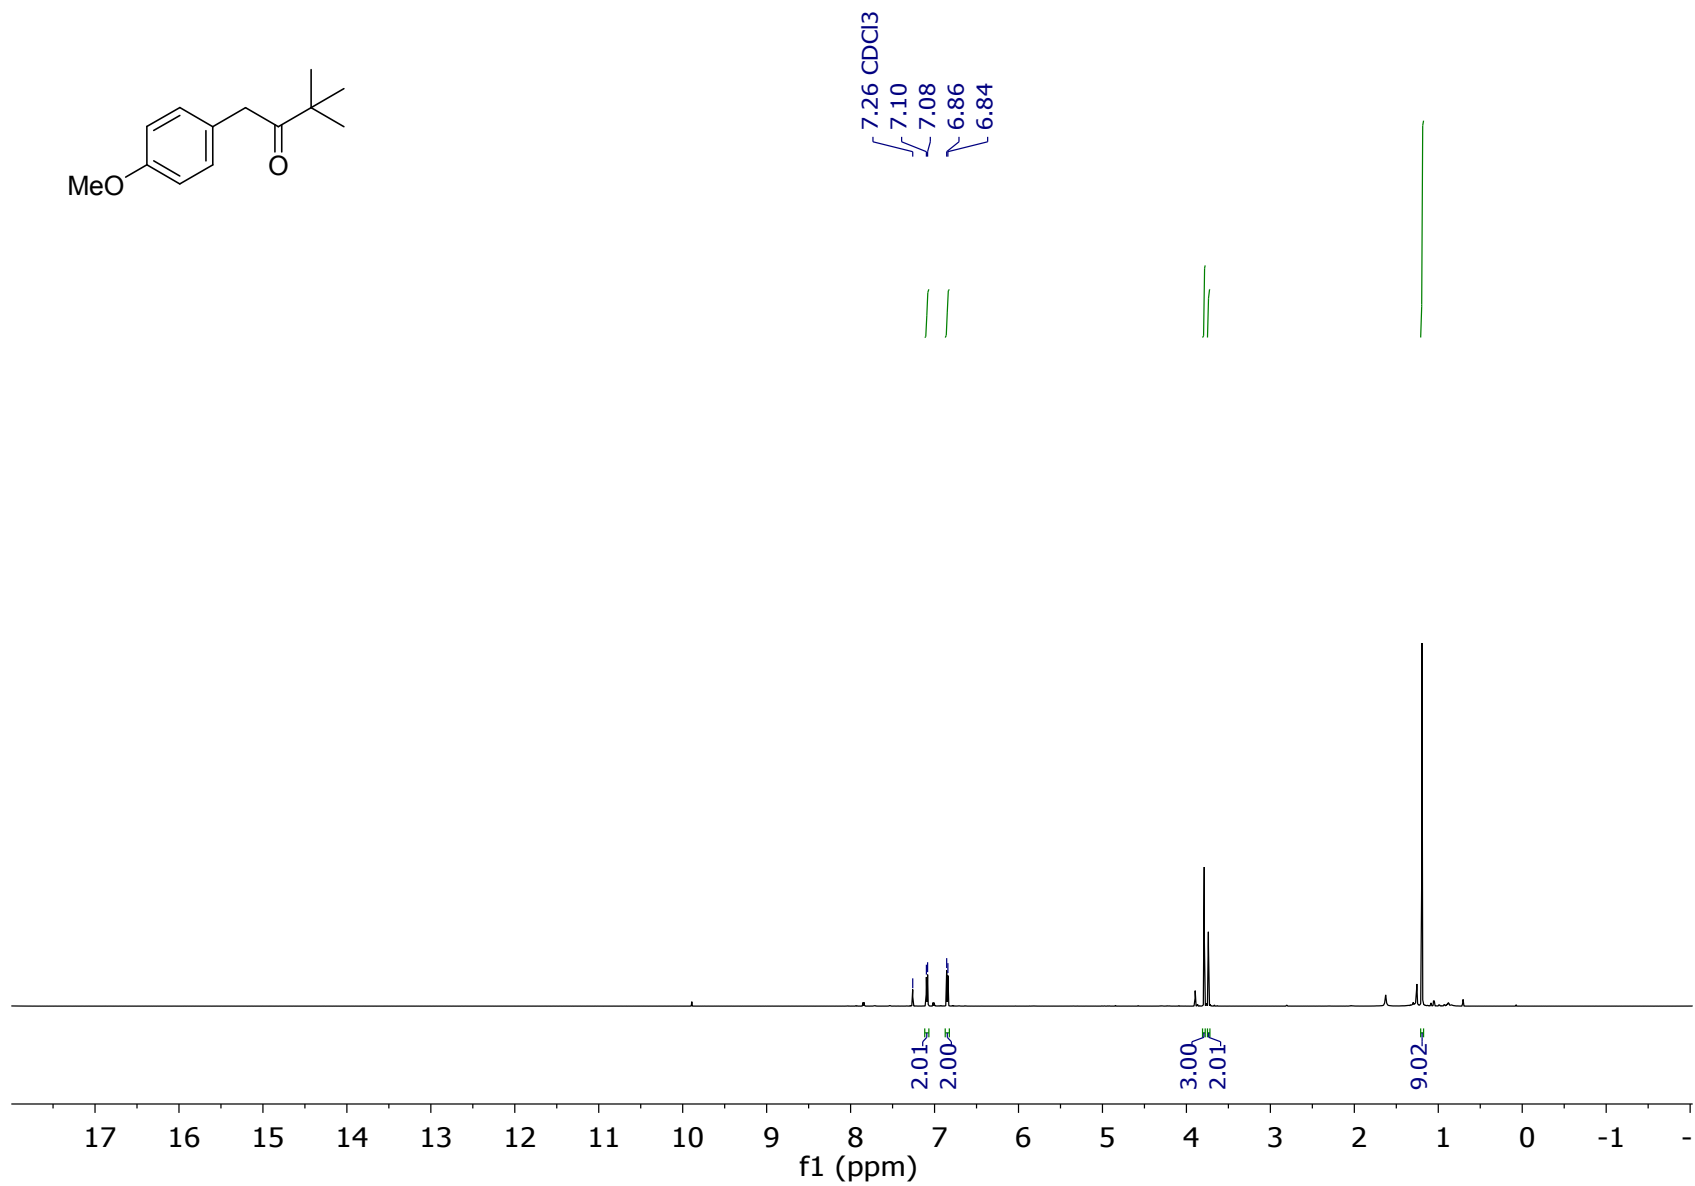

Figure S50. <sup>1</sup>H NMR (600 MHz, Chloroform-d) of 1-(4-methoxyphenyl)-3,3-dimethylbutan-2-one (21b).

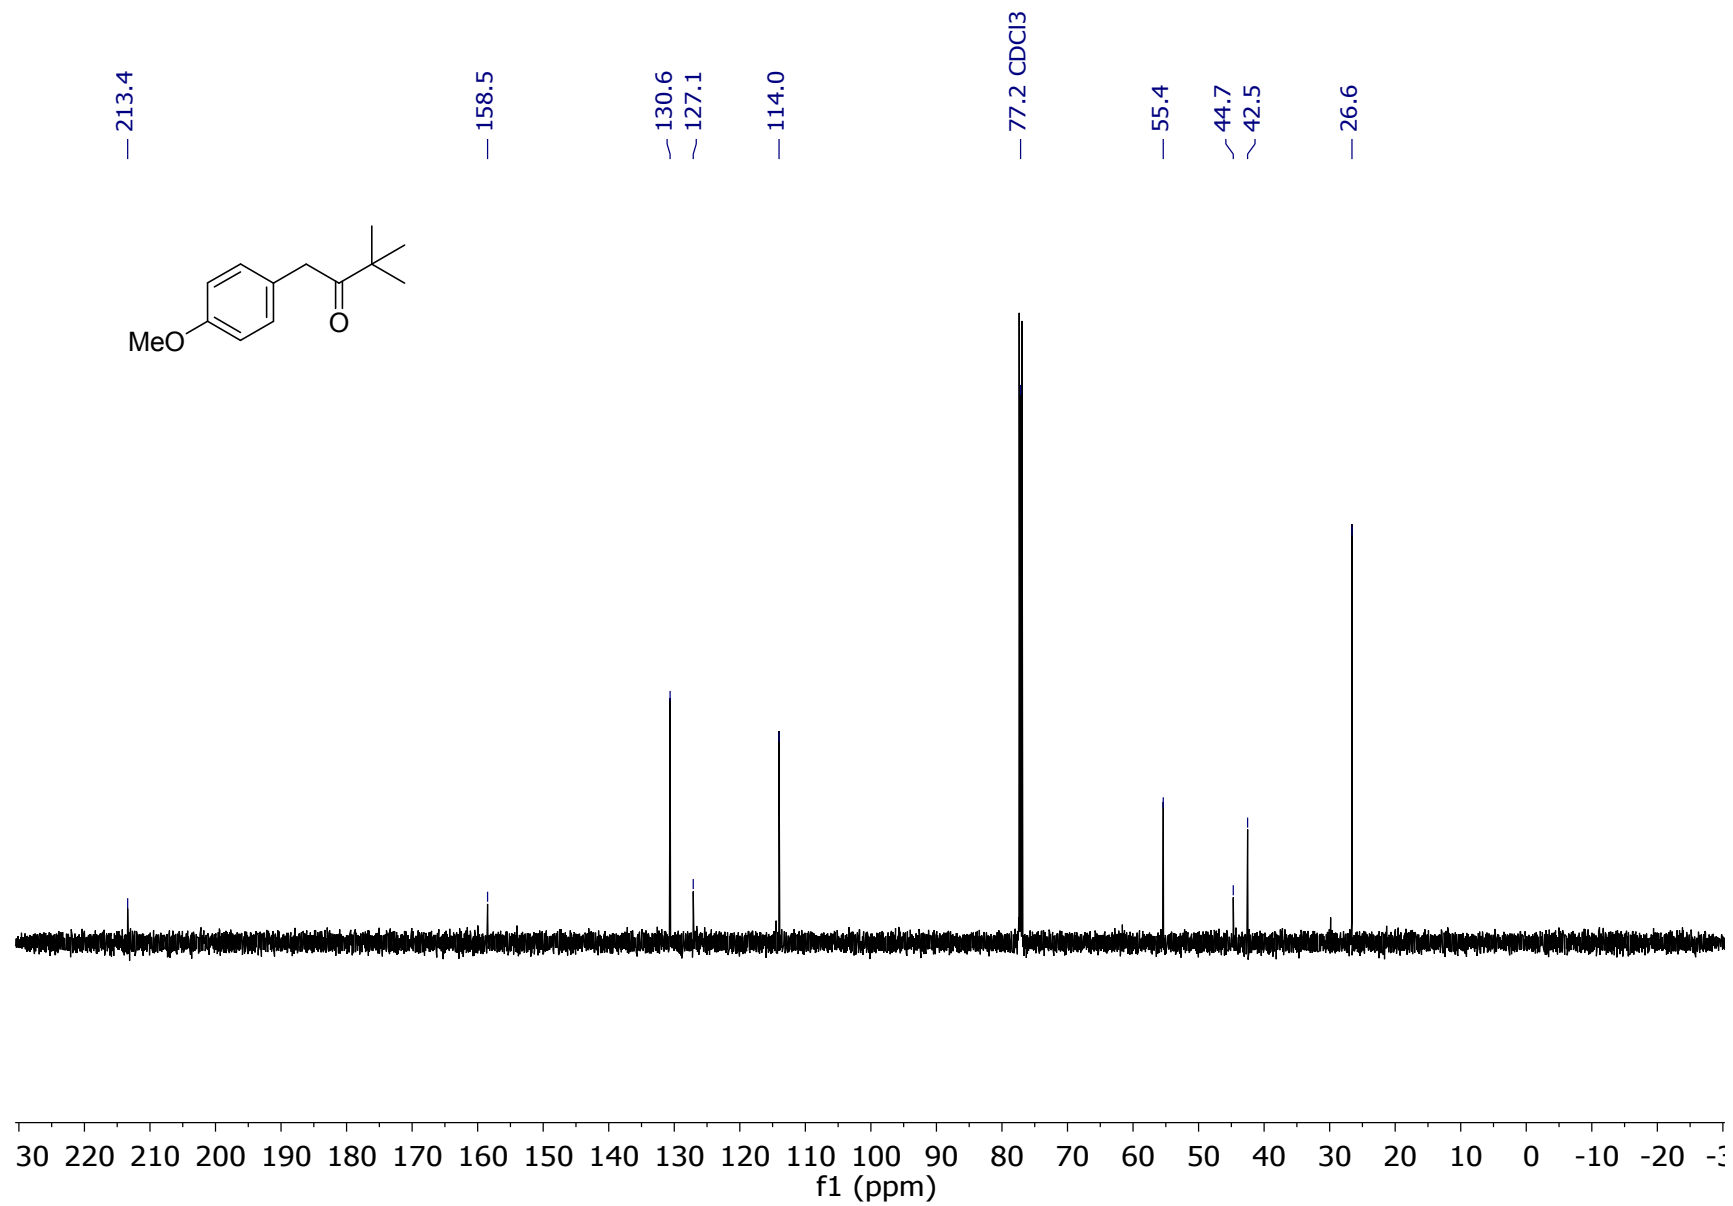

Figure S51.  $^{13}\text{C}\{^1\text{H}\}$  NMR (151 MHz, Chloroform-d) of 1-(4-methoxyphenyl)-3,3-dimethylbutan-2-one (21b).

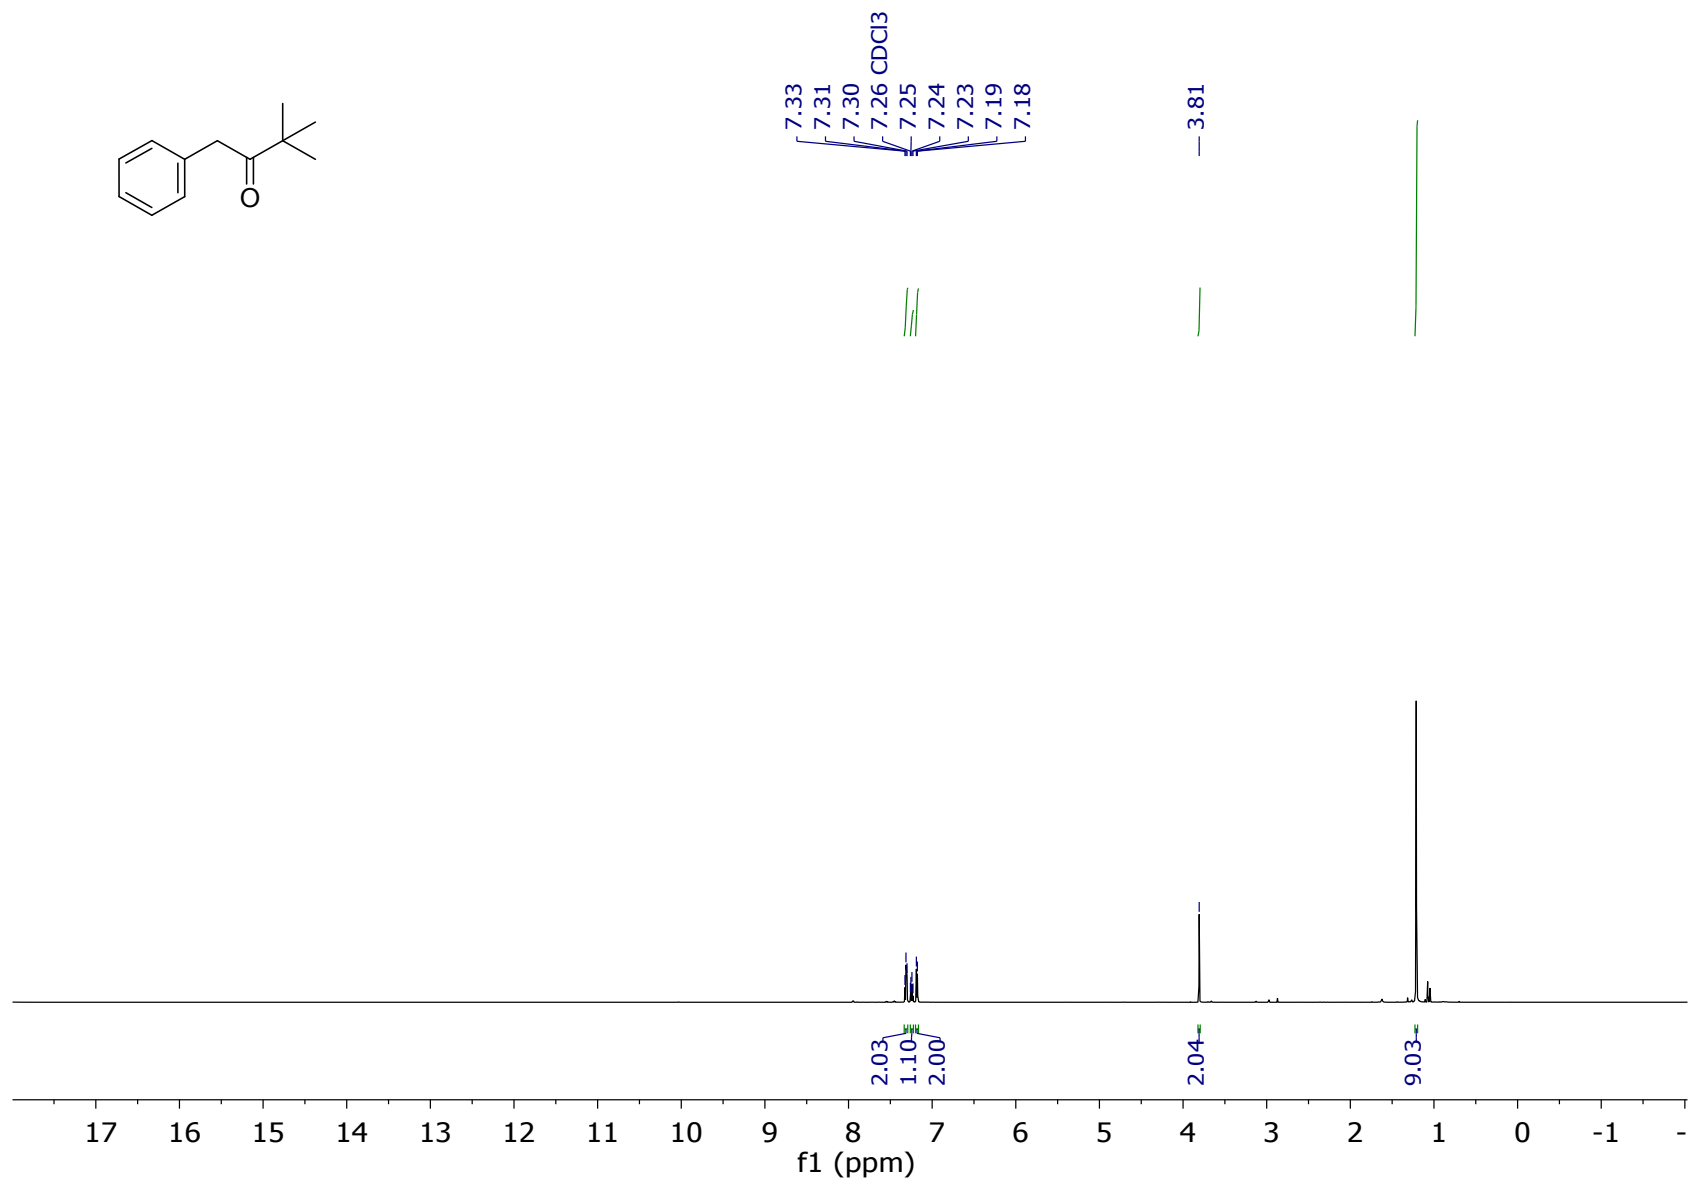

Figure S52. <sup>1</sup>H NMR (600 MHz, Chloroform-d) of 3,3-dimethyl-1-phenylbutan-2-one (22b).

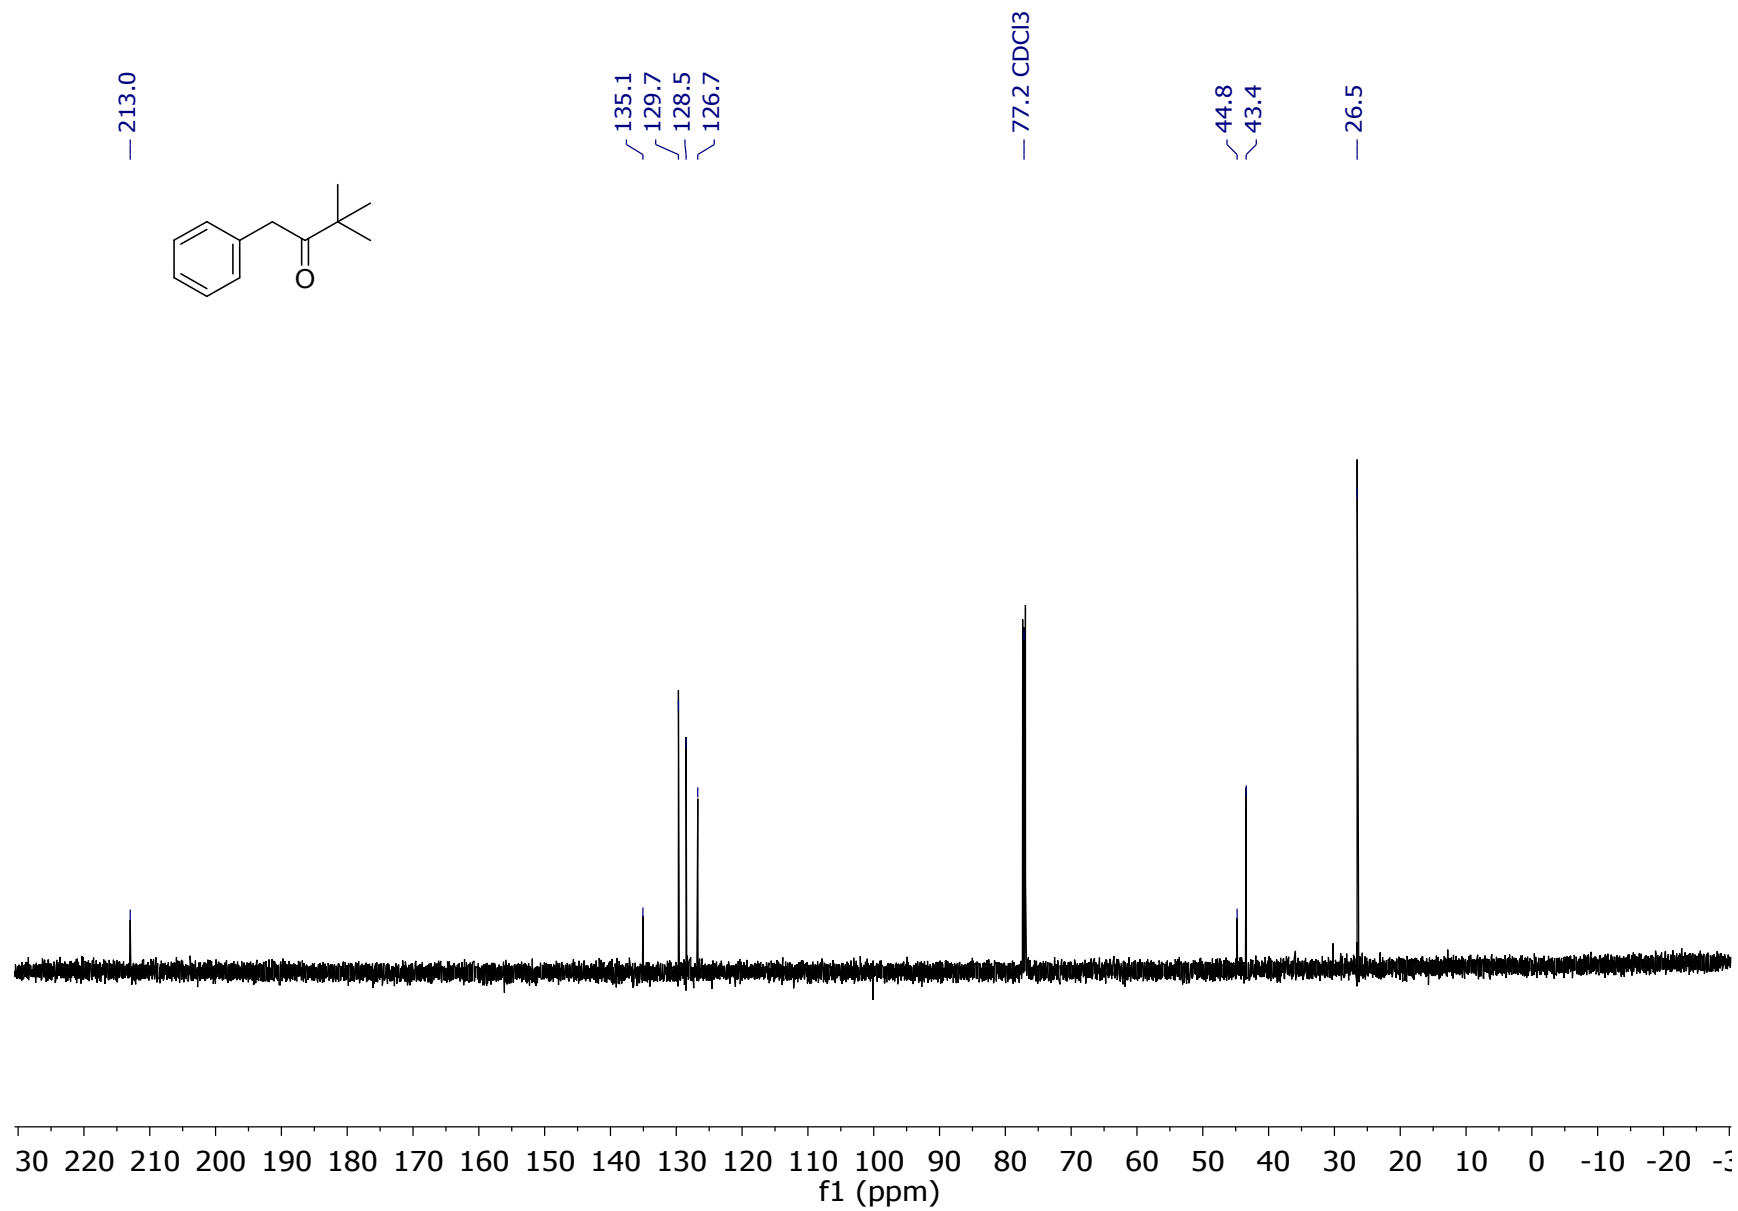

Figure S53.  $^{13}\text{C}\{^1\text{H}\}$  NMR (151 MHz, Chloroform-d) of 3,3-dimethyl-1-phenylbutan-2-one (22b).

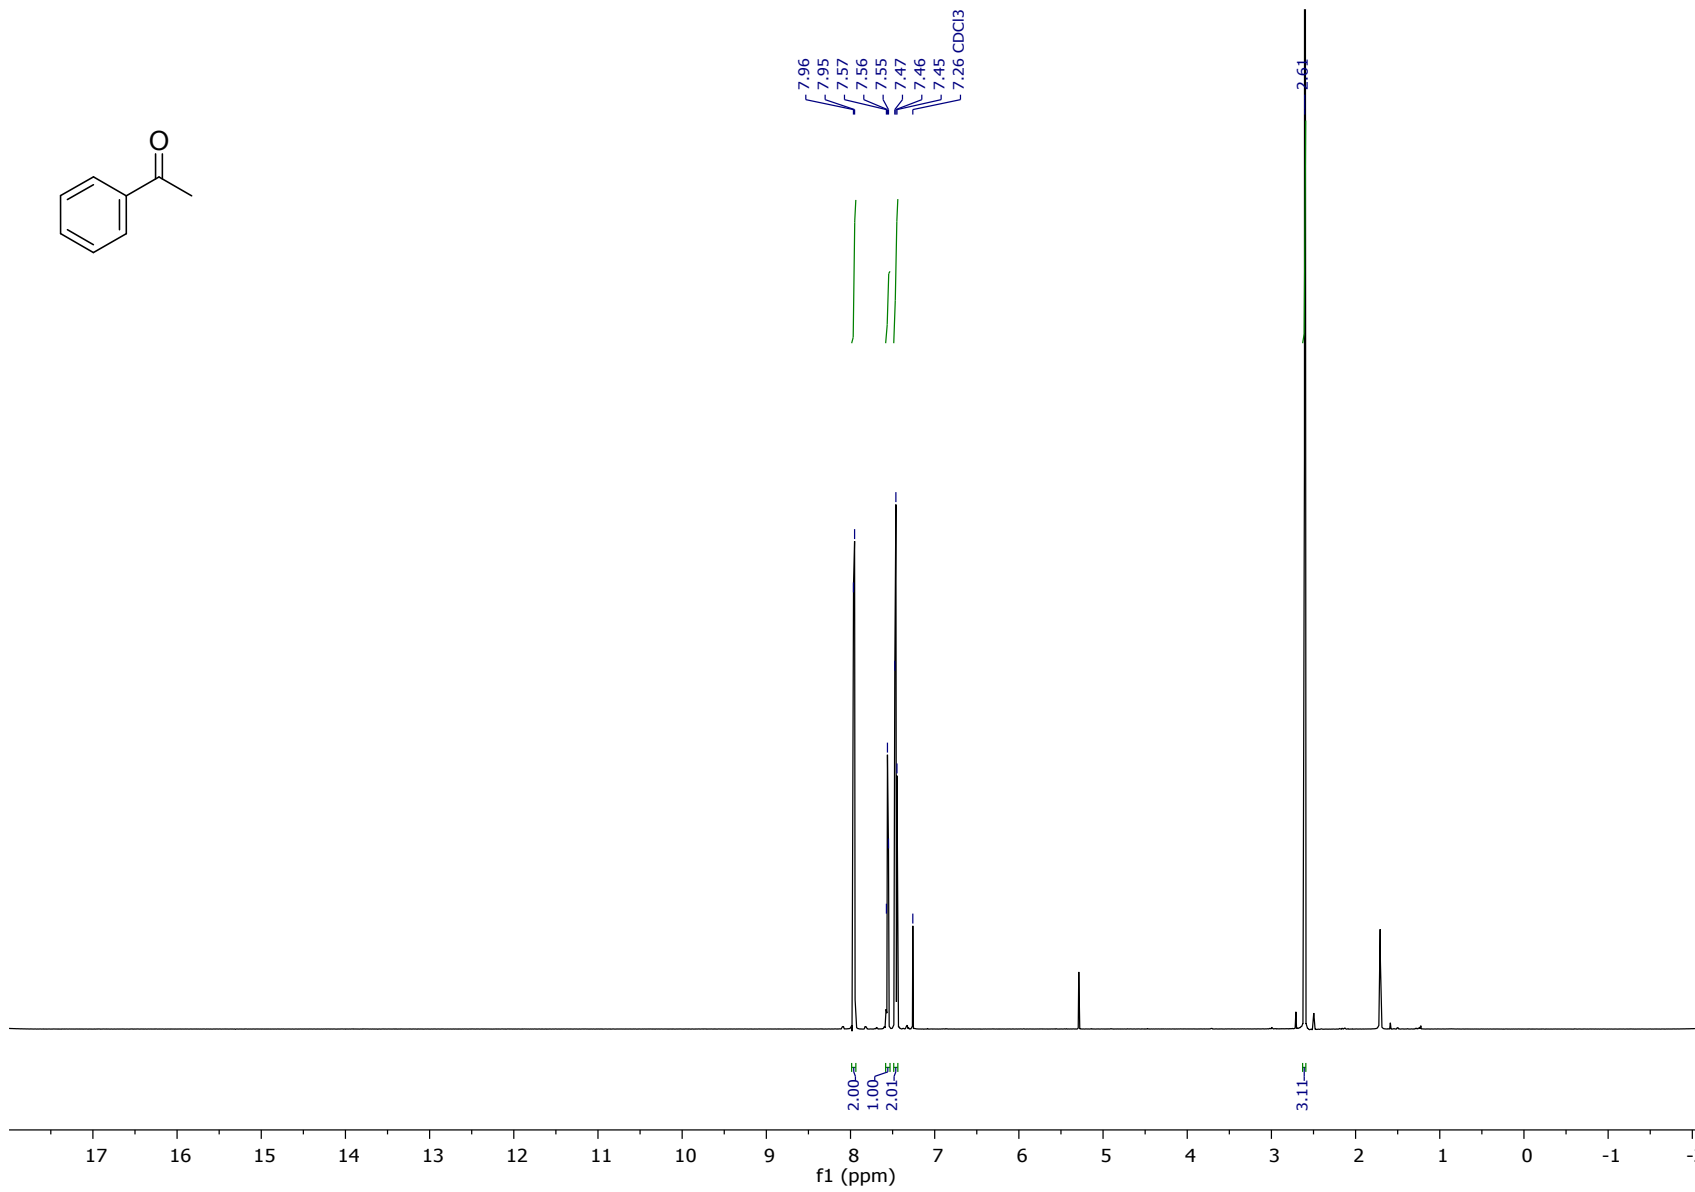

Figure S54. <sup>1</sup>H NMR (600 MHz, Chloroform-d) of acetophenone (23a).



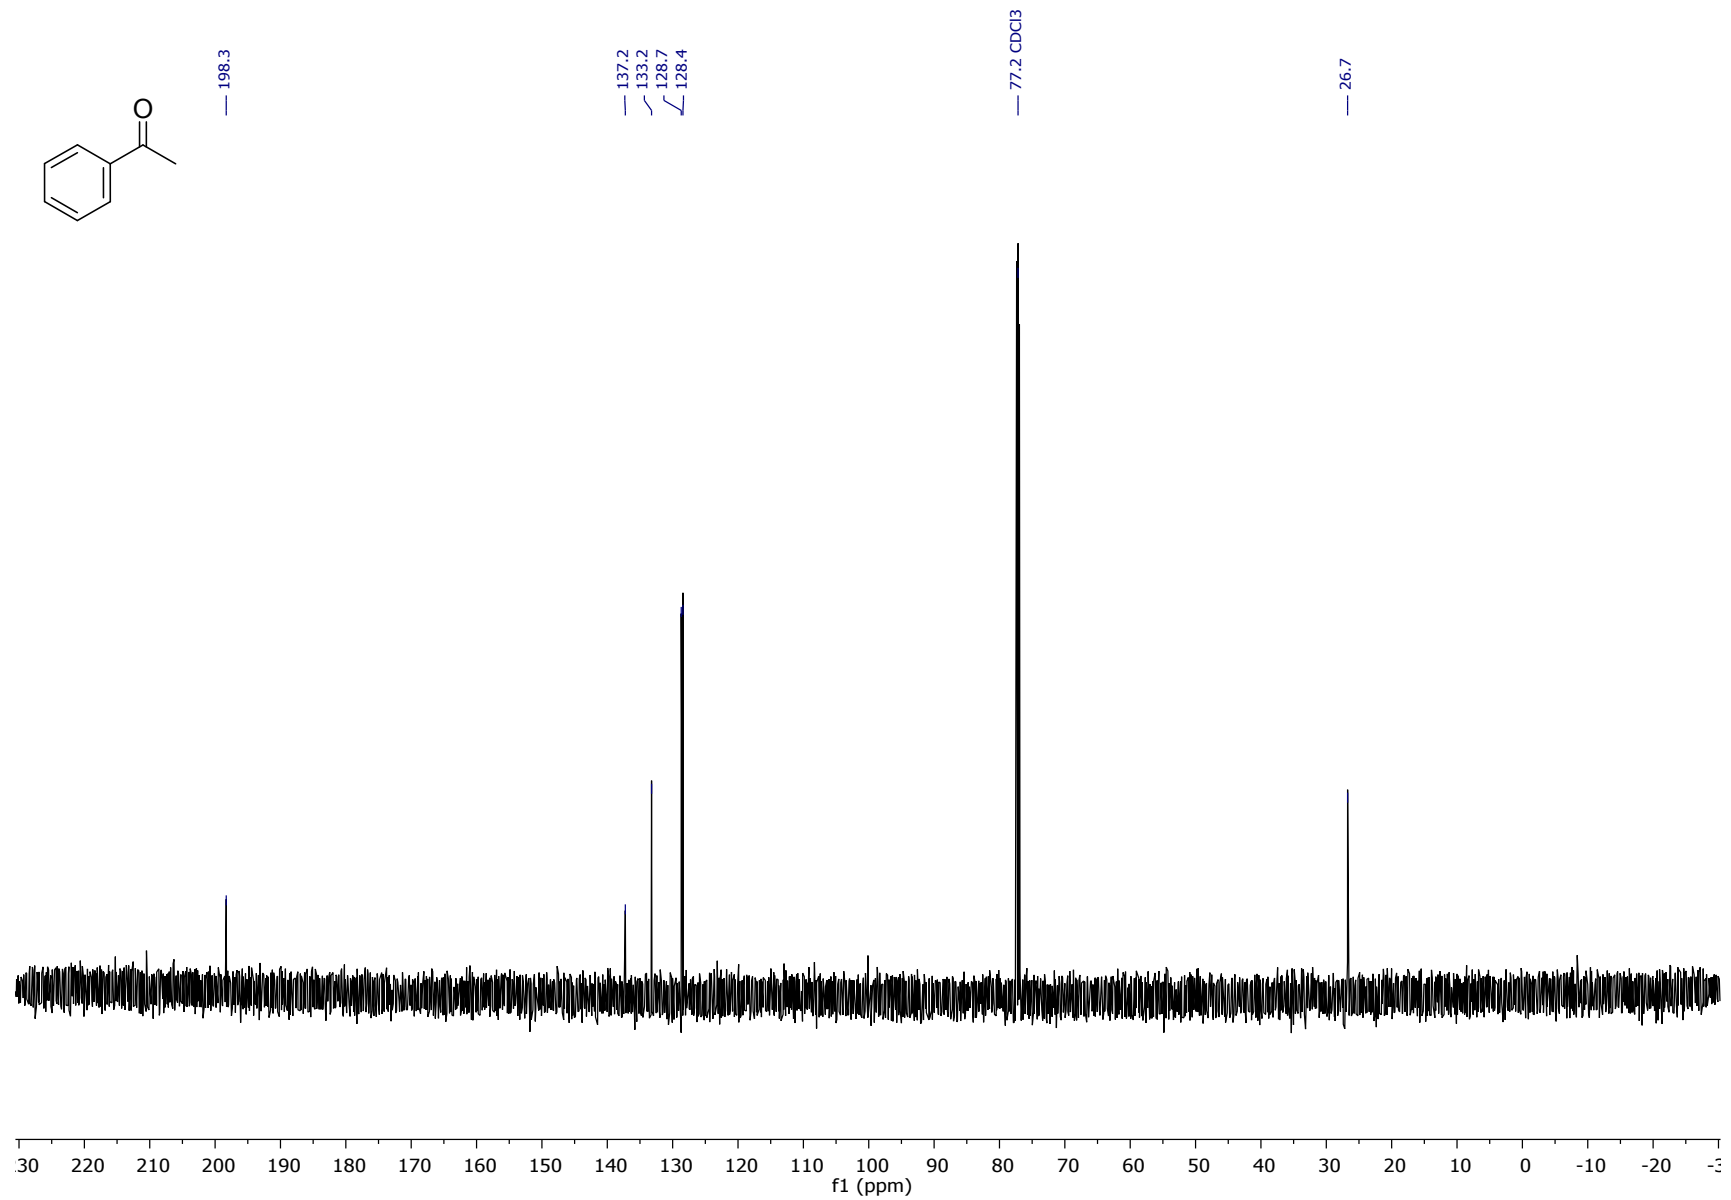

Figure S55.  $^{13}\text{C}\{^1\text{H}\}$  NMR (151 MHz, Chloroform-d) of acetophenone (23a).
